# Supplementary material for: Asymmetric [3 + 2] cycloaddition of donor–acceptor cyclopropanes with azadienes enabled by Brønsted base catalysis
Source: Royal Society of Chemistry journal article supplement (doi:10.1039/d4qo00002a), 2024-01-01
Supplement: d4qo00002a1.pdf [file d4qo00002a1.pdf]

# Supporting Information

## Asymmetric [3+2] Cycloaddition of Donor–Acceptor Cyclopropanes with Azadienes Enabled by Brønsted Base Catalysis

Shu Li,<sup>‡</sup> Zhi-Hong Dong,<sup>‡</sup> Si-Yu Dan, Mei-Jun Zheng, Teng Long, Jie Zhan, Qing Zhou, Wen-Dao  
Chu,<sup>\*</sup> Quan-Zhong Liu<sup>\*</sup>

### Table of Contents

|                                                                                |     |
|--------------------------------------------------------------------------------|-----|
| <b>1. General information</b> .....                                            | 2   |
| <b>2. Preparation of azadienes 1</b> .....                                     | 2   |
| <b>3. Preparation of cyclopropanes 2</b> .....                                 | 4   |
| <b>4. General steps of the racemic [ 3 + 2 ] cycloaddition reaction</b> .....  | 5   |
| <b>5. General procedure for the enantioselective [3+2] cycloaddition</b> ..... | 6   |
| <b>7. Experimental Procedure for the Gram-Scale Reaction</b> .....             | 24  |
| <b>8. Transformations of the Product 3a</b> .....                              | 24  |
| <b>9. References</b> .....                                                     | 26  |
| <b>10. NMR spectra of the products</b> .....                                   | 27  |
| <b>11. HPLC spectra of the products</b> .....                                  | 69  |
| <b>12. X-ray crystallographic data of 3q</b> .....                             | 106 |

## 1. General information

All reactions were carried out under an atmosphere of argon using standard Schlenk techniques. All the reagents were obtained from commercial supplier and used as received, without further purification unless otherwise noted. Solvents used in the reactions were distilled from appropriate drying agents prior to use.  $^1\text{H}$  NMR,  $^{13}\text{C}$  NMR and  $^{19}\text{F}$  NMR spectra were recorded respectively at 400 MHz, 100 MHz, 377 MHz on Bruker Avance 400M. Chemical shifts were reported in parts per million (ppm) down field from TMS with the solvent resonance as the internal standard. Data are reported as: multiplicity (s = singlet, d = doublet, t = triplet, q = quartet, m = multiplet), coupling constant in hertz (Hz) and signal area integration in natural numbers. Optical rotations were measured in the indicated solvents on Perkin Elmer polarimeter (Polartronic MH8) with a 10 cm cell (c given in g/100 mL). Flash column chromatography was performed using 200-300 mesh silica gel. Enantiomeric excess (*ee*) were determined by HPLC analysis on a Shimadzu LC-20A, using Daicel Chiralpak IA columns, IC columns, IE columns, and OD-H columns. High resolution mass spectra were obtained on Waters Vion<sup>®</sup> IMS Q-TOF and Thermo Fisher Scientific Orbitrap 120 in ESI mode. The X-ray single-crystal determination was performed on Bruker D8 VENTURE X-ray single crystal diffractometer. The catalysts were commercially available.

## 2. Preparation of azadienes 1

### Route 1 :

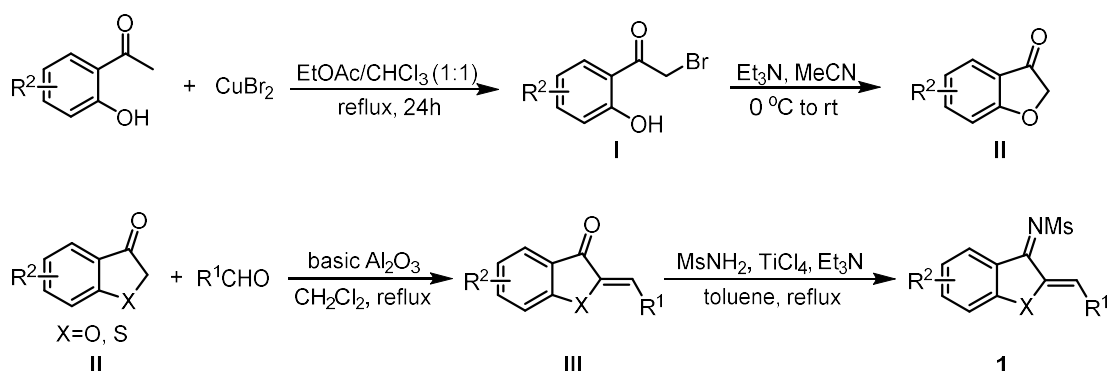

The azadienes **1** were prepared according to the literature procedures.<sup>1</sup> To a solution of *o*-Acetyl phenol (30.0 mmol, 1.0 equiv.) in CHCl<sub>3</sub> was added CuBr<sub>2</sub> (51.0 mmol, 1.7 equiv.) dissolved in ethyl acetate, the reaction was kept at reflux until the starting material was consumed. The reaction mixture was concentrated under vacuum and the

residue was purified by flash chromatography on silica gel to give the desired compound **I**.

The compound **I** (20.0 mmol, 1.0 equiv.) was dissolved in MeCN, then cooled to 0 °C, Et<sub>3</sub>N (40.0 mmol, 2.0 equiv.) was slowly added. The solution was quenched with water (50 mL) and extracted with CH<sub>2</sub>Cl<sub>2</sub> (3 × 50 mL). The combined organic phase was dried over Na<sub>2</sub>SO<sub>4</sub> and concentrated. The residue was purified by flash chromatography on silica gel to afford the product **II**.

Under nitrogen, aluminium oxide (50.0 mmol, 10 equiv., activated, basic) was added to a solution of ketones **II** (10.0 mmol, 1.0 equiv.) and aldehydes (20.0 mmol, 2.0 equiv.) in CH<sub>2</sub>Cl<sub>2</sub> (40 mL). The mixture was thoroughly stirred at 40 °C under nitrogen. The progress of the reaction was monitored by TLC analysis. The suspension was filtered off, the residue washed with CH<sub>2</sub>Cl<sub>2</sub>, and the washes were combined with the filtrate. The solvent was evaporated in vacuo. The residue was purified by flash chromatography on silica gel and recrystallized from ethyl acetate/hexane to give pure enones **III**.

Methanesulfonamide (3.0 mmol, 1.0 equiv.) and compound **III** (3.0 mmol, 1.0 equiv.) were added in a round bottom flask under nitrogen, then toluene (30 mL) was added and cooled to 0 °C. Et<sub>3</sub>N (6.0 mmol, 2.0 equiv.) and TiCl<sub>4</sub> (3.0 mmol, 1.0 equiv.) were slowly added and the mixture was kept at reflux under nitrogen overnight. The solution was then cooled to room temperature, quenched with water (30 mL) and extracted with CH<sub>2</sub>Cl<sub>2</sub> (3 × 30 mL). The combined organic phase was dried over Na<sub>2</sub>SO<sub>4</sub> and concentrated. The residue was purified by flash chromatography on silica gel to afford azadienes **1**.

#### Route 2 :

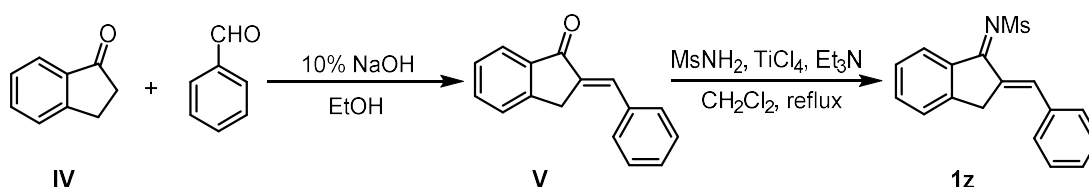

The azadienes **1z** was prepared according to the reported literature procedures.<sup>2</sup> 1-Indanone **IV** was added in ethanol followed by the addition of equivalent amount of aryl aldehydes. The 10% aqueous solution of NaOH was added drop wise to the mixture

at room temperature which resulted in precipitation. The mixture was then cooled for 30 minutes, filtered, washed with cold methanol, and dried to solid compounds **V**.

To a solution of methanesulfonamide (5.0 mmol) and solid compounds **V** (5.0 mmol) in DCM (15 mL) were successively added Et<sub>3</sub>N (10 mmol) and TiCl<sub>4</sub> (5.0 mmol) at 0 °C with stirring. The resulting mixture was heated at reflux overnight. After being cooled to room temperature and quenched with water (100 mL), the organic layer was separated and the aqueous layer was extracted with DCM (3 × 50 mL). The combined organic phase was washed with water (3 × 20 mL) and dried over Na<sub>2</sub>SO<sub>4</sub> and concentrated. The residue was purified by flash chromatography on silica gel to afford azadienes **1z**.

### 3. Preparation of cyclopropanes **2**

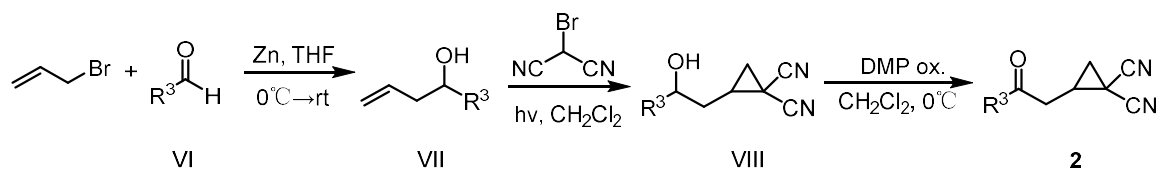

Cyclopropanes were synthesized according to literature procedure.<sup>3</sup> To the corresponding aldehyde **VI** (50 mmol, 1.0 equiv.) in THF (50 mL) were added allyl bromide (5.19 mL, 60 mmol, 1.2 equiv.) followed by Zn dust (4.25 g, 65 mmol, 1.3 equiv.) in one portion. The reaction was cooled to 0 °C in an ice-bath. With vigorous stirring, a saturated aqueous solution of NH<sub>4</sub>Cl (50 mL) was added dropwise from an addition funnel over 1 h. The ice bath was removed following the addition of NH<sub>4</sub>Cl and the reaction warmed to rt. After 2 h at rt, an aqueous solution of citric acid (100 mL) was added and the mixture vigorously stirred for 15 min. Diethyl ether (120 mL) was added and the organic layer separated. The organic layer was then washed sequentially with aq. HCl (1 M, 50 mL), sat. aq. NaHCO<sub>3</sub> and sat. aq. brine, and the combined organic extracts were dried over Na<sub>2</sub>SO<sub>4</sub>, filtered and concentrated under reduced pressure. The crude products were then purified by vacuum distillation or column chromatography to afford the desired products **VII**.

In a 100 mL Schlenk flask was added dry CH<sub>2</sub>Cl<sub>2</sub> (70 mL, 0.15 M). The flask was purged with argon, fitted with an argon balloon and then sonicated for 20 min to de-gas the solvent. Bromomalononitrile (2.17 g, 15 mmol, 1.5 equiv.) and the corresponding homoallyl alcohol **VII** (10 mmol, 1 equiv.) were then added and the reaction mixture

subjected to photo-irradiation (365-370 nm, 15 V, 1 A, 45 W). Reaction progress was monitored by crude NMR. After full consumption of the homoallyl alcohol, photoirradiation was halted and the reaction mixture was cooled to 0 °C. Triethylamine (2.09 mL, 15 mmol, 1.5 eq.) was added and the reaction stirred for 2 h. The crude mixture was poured into a round-bottomed flask and concentrated under reduced pressure, then directly column chromatographed (silica gel) to afford the desired cyclopropanes **VIII** as mixtures of diastereomers.

The corresponding cyclopropyl alcohol **VIII** (5 mmol, 1.0 equiv.) was dissolved in CH<sub>2</sub>Cl<sub>2</sub> (120 mL) and cooled to 0 °C. Dess-Martin periodinane (6 mmol, 1.2 equiv.) was added in two portions with a 10 min interval. The mixture was stirred for 2 h while slowly warming. The crude mixture was then concentrated to one-third volume and column chromatographed (silica gel) to afford the desired product **2**.

#### 4. General procedure for the racemic [ 3 + 2 ] cycloaddition

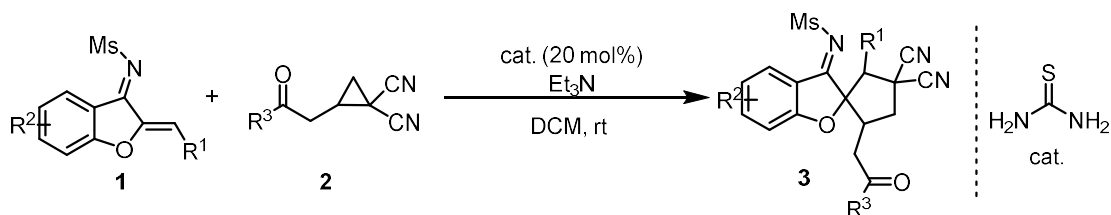

A flame-dried vial equipped with a magnetic stirring bar was charged with benzofuranone **1** (0.1 mmol, 1.0 equiv.), catalyst (0.002 mmol, 0.02 equiv.), Et<sub>3</sub>N (0.002 mmol, 0.02 equiv.) and CH<sub>2</sub>Cl<sub>2</sub> (1.0 mL) were added to the vial which was then sealed with a septum. The vial was connected to an argon-vacuum line, evacuated, backfilled with argon and then filled with a solution of ketone **2** (0.15 mmol, 1.5 equiv.) in CH<sub>2</sub>Cl<sub>2</sub> (1.0 mL). The mixture was then reacted at room temperature for 2 hours. After confirming full conversion by TLC, the reaction mixture was filtered through a short pad of Celite®. The solvent was then evaporated in vacuo and the crude reaction mixture was purified by column chromatography on silica gel to give the corresponding racemic product **3**.

## 5. General procedure for the enantioselective [3+2] cycloaddition

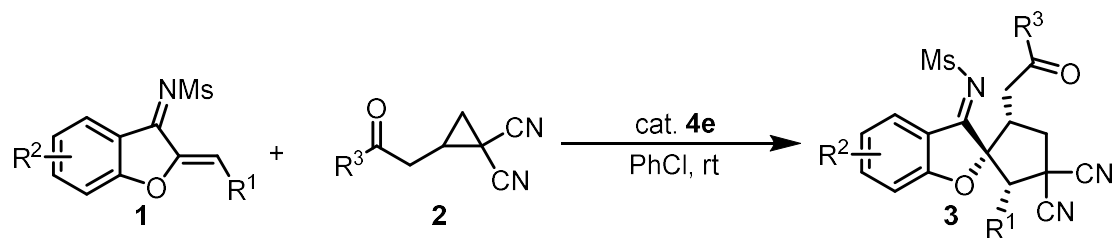

A flame-dried vial equipped with a magnetic stirring bar was charged with benzofuranone **1** (0.1 mmol, 1.0 equiv.), Catalyst **4e** (0.002 mmol, 0.02 equiv.) and PhCl (1.0 mL) were added to the vial which was then sealed with a septum. The vial was connected to an argon-vacuum line, evacuated, backfilled with argon and then filled with a solution of ketone **2** (0.15 mmol, 1.5 equiv.) in PhCl (1.0 mL). The mixture was allowed to react for 24-48 h at rt. After confirming full conversion by TLC, the reaction mixture was filtered through a short pad of Celite®. The solvent was then evaporated in vacuo and the crude reaction mixture was purified by column chromatography on silica gel to give the corresponding product **3**.

## 6. Characterization of the Products of 3

### *N*-((2*R*,2'*S*,5'*S*,*E*)-3',3'-dicyano-5'-(2-oxopropyl)-2'-phenyl-3*H*-spiro[benzofuran-2,1'-cyclopentan]-3-ylidene)methanesulfonamide (**3a**)

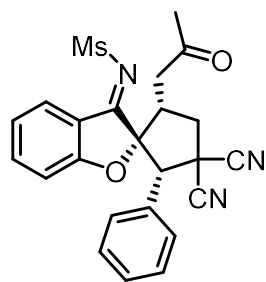

White solid, 43.4 mg. 97% yield.  $R_f = 0.3$  (petroleum ether/ethyl acetate = 2:1), 7:1 dr.  $M_p = 86.9-87.3$  °C,  $[\alpha]_D^{25} = +66.15$  ( $c = 0.214$ ,  $\text{CHCl}_3$ ). 91% ee. **<sup>1</sup>H NMR** (400 MHz,  $\text{CDCl}_3$ , ppm)  $\delta$  8.27 (d,  $J = 8.2$  Hz, 1H), 7.65 (t,  $J = 7.5$  Hz, 1H), 7.48 – 7.37 (m, 2H), 7.22 (dt,  $J = 13.3, 5.8$  Hz, 4H), 7.06 (t,  $J = 7.7$  Hz, 1H), 3.92 (s, 1H), 3.44 (dd,  $J = 14.3, 9.6$  Hz, 1H), 3.30 (s, 3H), 3.28 – 3.18 (m, 1H), 2.77 – 2.58 (m, 2H), 2.49 (dd,  $J = 18.5, 4.2$  Hz, 1H), 2.07 (s, 3H). **<sup>13</sup>C NMR** (100 MHz,  $\text{CDCl}_3$ , ppm)  $\delta$  205.1, 177.5, 169.5, 140.0, 131.1, 130.1, 129.9, 129.2, 128.5, 123.4, 117.9, 115.9, 115.5, 112.5, 98.8, 64.0, 44.4, 43.2, 43.0, 42.2, 39.0, 30.0. **HPLC**: Chiralpak IA (250 mm); detected at 280 nm; *n*-hexane/*i*-propanol = 90/10, flow = 1.0 mL/min; Retention time: 22.945 min (major), 28.097 min (minor). **HRMS (ESI)**: calcd for  $\text{C}_{24}\text{H}_{22}\text{N}_3\text{O}_4\text{S}$   $[\text{M}+\text{H}]^+$  448.1326, found 448.1323.

**N-((2*R*,2'*S*,5'*S*,*E*)-3',3'-dicyano-5'-(2-oxopropyl)-2'-phenyl-3*H*-spiro[benzofuran-2,1'-cyclopentan]-3-ylidene)-4-methylbenzenesulfonamide(3a')**

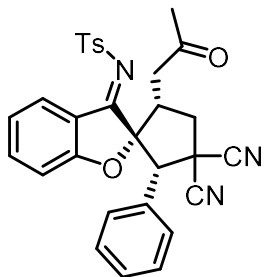

White solid, 35.6 mg. 68% yield.  $R_f = 0.3$  (petroleum ether/ethyl acetate = 2:1), 6:1 dr.  $M_p = 85.4\text{--}86.7\text{ }^\circ\text{C}$ ,  $[\alpha]_D^{25} = +70.38$  ( $c = 0.152$ ,  $\text{CHCl}_3$ ). 90% ee.  $^1\text{H NMR}$  (400 MHz,  $\text{CDCl}_3$ , ppm)  $\delta$  8.46 (d,  $J = 8.1$  Hz, 1H), 7.86 (d,  $J = 8.1$  Hz, 2H), 7.67 (ddd,  $J = 8.5, 7.2, 1.4$  Hz, 1H), 7.40 (d,  $J = 8.1$  Hz, 2H), 7.37 – 7.31 (m, 2H), 7.2 – 7.24 (m, 1H), 7.21 (t,  $J = 7.4$  Hz, 3H), 7.11 (t,  $J = 7.7$  Hz, 1H), 3.79 (s, 1H), 3.36 (dd,  $J = 14.4, 9.8$  Hz, 1H), 3.15 (d,  $J = 9.3$  Hz, 1H), 2.71 – 2.56 (m, 2H), 2.51 (m, 4H), 2.06 (s, 3H).  $^{13}\text{C NMR}$  (100 MHz,  $\text{CDCl}_3$ , ppm)  $\delta$  205.1, 176.7, 169.7, 144.4, 139.9, 137.8, 131.3, 130.1, 129.9, 129.1, 128.6, 127.3, 123.5, 118.0, 115.8, 115.6, 112.5, 99.0, 63.6, 44.4, 43.1, 42.3, 38.9, 30.1, 21.8. **HPLC**: Chiralpak IA (250 mm); detected at 280 nm; *n*-hexane/*i*-propanol = 90/10, flow = 1.0 mL/min; Retention time: 40.287 min (major), 92.622 min (minor). **HRMS (ESI)**: calcd for  $\text{C}_{30}\text{H}_{25}\text{N}_3\text{O}_4\text{S}$   $[\text{M}+\text{H}]^+$  524.1566, found 524.1568.

**N-((2*R*,2'*S*,5'*S*,*E*)-3',3'-dicyano-5'-(2-oxopropyl)-2'-(*p*-tolyl)-3*H*-spiro[benzofuran-2,1'-cyclopentan]-3-ylidene)methanesulfonamide (3b)**

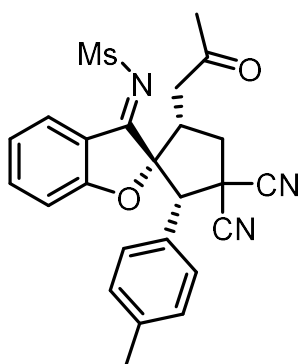

White solid, 43.8 mg. 95% yield.  $R_f = 0.3$  (petroleum ether/ethyl acetate = 2:1), 6:1 dr.  $M_p = 94.3\text{--}96.1\text{ }^\circ\text{C}$ ,  $[\alpha]_D^{25} = +48.33$  ( $c = 0.418$ ,  $\text{CHCl}_3$ ). 90% ee.  $^1\text{H NMR}$  (400 MHz,  $\text{CDCl}_3$ , ppm)  $\delta$  8.28 (d,  $J = 8.2$  Hz, 1H), 7.65 (ddd,  $J = 8.5, 7.2, 1.4$  Hz, 1H), 7.38 – 7.27 (m, 2H), 7.20 (d,  $J = 8.4$  Hz, 1H), 7.07 (ddd,  $J = 8.2, 7.2, 0.9$  Hz, 1H), 7.01 (d,  $J = 7.9$  Hz, 2H), 3.89 (s, 1H), 3.42 (dd,  $J = 14.3, 9.7$  Hz, 1H), 3.30 (s, 3H), 3.22 (dt,  $J = 10.6, 5.3$  Hz, 1H), 2.72 – 2.54 (m, 2H), 2.47 (dd,  $J = 18.5, 4.1$  Hz, 1H), 2.21 (s, 3H), 2.06 (s, 3H).  $^{13}\text{C NMR}$  (100 MHz,  $\text{CDCl}_3$ , ppm)  $\delta$  205.2, 177.6, 169.6, 140.1, 140.0, 131.1, 129.9, 129.7, 125.4, 123.4, 118.0, 116.0, 115.6, 112.5, 98.9, 63.8, 44.5, 43.1, 43.0, 42.2, 39.2, 30.0, 21.2. **HPLC**: Chiralpak IA (250 mm); detected at 280 nm; *n*-hexane/*i*-propanol = 90/10, flow = 1.0 mL/min; Retention time: 21.537 min (major), 27.078 min (minor). **HRMS (ESI)**: calcd for  $\text{C}_{25}\text{H}_{24}\text{N}_3\text{O}_4\text{S}$   $[\text{M}+\text{H}]^+$  462.1482, found 462.1488.

**N-((2*R*,2'*S*,5'*S*,*E*)-2'-(4-(*tert*-butyl)phenyl)-3',3'-dicyano-5'-(2-oxopropyl)-3*H*-spiro[benzofuran-2,1'-cyclopentan]-3-ylidene)methanesulfonamide (3c)**

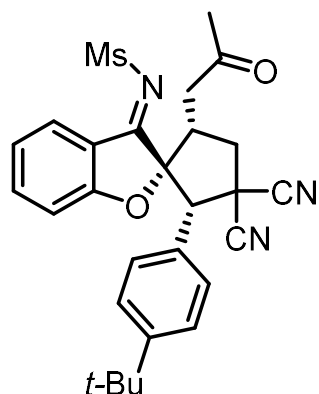

White solid, 46.6 mg. 95% yield.  $R_f = 0.3$  (petroleum ether/ethyl acetate = 2:1), 6:1 dr.  $M_p = 65.8\text{--}68.4\text{ }^\circ\text{C}$ ,  $[\alpha]_D^{25} = +23.97$  ( $c = 0.406$ ,  $\text{CHCl}_3$ ). 90% ee.  **$^1\text{H NMR}$**  (400 MHz,  $\text{CDCl}_3$ , ppm)  $\delta$  8.29 (d,  $J = 8.2$  Hz, 1H), 7.67 (ddd,  $J = 8.5$ , 7.1, 1.4 Hz, 1H), 7.31 (d,  $J = 8.4$  Hz, 2H), 7.24 – 7.18 (m, 3H), 7.08 (t,  $J = 7.7$  Hz, 1H), 3.92 (s, 1H), 3.42 (dd,  $J = 14.3$ , 9.6 Hz, 1H), 3.30 (s, 3H), 3.22 (dt,  $J = 9.8$ , 4.9 Hz, 1H), 2.71 – 2.55 (m, 2H), 2.46 (dd,  $J = 18.5$ , 4.1 Hz, 1H), 2.06 (s, 3H), 1.20 (s, 9H).  **$^{13}\text{C NMR}$**  (100 MHz,  $\text{CDCl}_3$ , ppm)  $\delta$  205.2, 177.7, 169.6, 153.0, 140.0, 131.1, 129.5, 126.1, 125.5, 123.4, 118.0, 116.0, 115.6, 112.6, 99.0, 63.5, 44.8, 43.1, 43.0, 42.1, 39.3, 34.7, 31.2, 30.1. **HPLC**: Chiralpak IA (250 mm); detected at 280 nm; *n*-hexane/*i*-propanol = 90/10, flow = 1.0 mL/min; Retention time: 16.082 min (major), 20.892 min (minor). **HRMS (ESI)**: calcd for  $\text{C}_{28}\text{H}_{30}\text{N}_3\text{O}_4\text{S}$   $[\text{M}+\text{H}]^+$  504.1952, found 504.1954.

**N-((2*R*,2'*S*,5'*S*,*E*)-2'-([1,1'-biphenyl]-4-yl)-3',3'-dicyano-5'-(2-oxopropyl)-3*H*-spiro[benzofuran-2,1'-cyclopentan]-3-ylidene)methanesulfonamide (3d)**

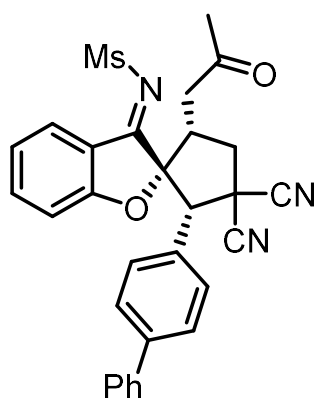

White solid, 49.5 mg. 94% yield.  $R_f = 0.3$  (petroleum ether/ethyl acetate = 2:1), 5:1 dr.  $M_p = 115.1\text{--}118.4\text{ }^\circ\text{C}$ ,  $[\alpha]_D^{25} = +80.74$  ( $c = 0.244$ ,  $\text{CHCl}_3$ ). 90% ee.  **$^1\text{H NMR}$**  (400 MHz,  $\text{CDCl}_3$ , ppm)  $\delta$  8.30 (d,  $J = 8.2$  Hz, 1H), 7.65 (ddd,  $J = 8.6$ , 7.2, 1.4 Hz, 1H), 7.54 – 7.41 (m, 6H), 7.41 – 7.34 (m, 2H), 7.35 – 7.28 (m, 1H), 7.22 (d,  $J = 8.5$  Hz, 1H), 7.07 (ddd,  $J = 8.2$ , 7.2, 0.9 Hz, 1H), 3.98 (s, 1H), 3.45 (dd,  $J = 14.3$ , 9.7 Hz, 1H), 3.32 (s, 3H), 3.27 (dd,  $J = 9.5$ , 3.9 Hz, 1H), 2.73 – 2.59 (m, 2H), 2.51 (dd,  $J = 18.5$ , 4.2 Hz, 1H), 2.07 (s, 3H).  **$^{13}\text{C NMR}$**  (100 MHz,  $\text{CDCl}_3$ , ppm)  $\delta$  205.1, 177.6, 169.5, 142.8, 140.1, 139.9, 131.1, 130.3, 128.9, 127.8, 127.7, 127.4, 127.2, 123.5, 118.0, 115.9, 115.6, 112.5, 98.9, 63.7, 44.6, 43.1, 43.0, 42.1, 39.2, 30.0. **HPLC**: Chiralpak IA (250 mm); detected at 280 nm; *n*-hexane/*i*-propanol = 90/10, flow = 1.0 mL/min; Retention time: 22.223 min (major), 33.294 min (minor). **HRMS (ESI)**: calcd for  $\text{C}_{30}\text{H}_{26}\text{N}_3\text{O}_4\text{S}$   $[\text{M}+\text{H}]^+$  524.1639, found 524.1648.



**N-((2*R*,2'*S*,5'*S*,*E*)-3',3'-dicyano-2'-(4-methoxyphenyl)-5'-(2-oxopropyl)-3*H*-spiro[benzofuran-2,1'-cyclopentan]-3-ylidene)methanesulfonamide (3e)**

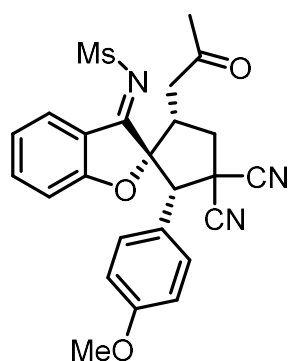

White solid, 44.9 mg. 94% yield.  $R_f = 0.3$  (petroleum ether/ethyl acetate = 2:1), 5:1 dr.  $M_p = 61.8\text{--}62.9\text{ }^\circ\text{C}$ ,  $[\alpha]_D^{25} = +71.26$  ( $c = 0.218$ ,  $\text{CHCl}_3$ ). 90% ee.  $^1\text{H NMR}$  (400 MHz,  $\text{CDCl}_3$ , ppm)  $\delta$  8.28 (d,  $J = 8.0$  Hz, 1H), 7.65 (ddd,  $J = 8.5, 7.3, 1.3$  Hz, 1H), 7.34 (d,  $J = 8.8$  Hz, 2H), 7.19 (d,  $J = 8.4$  Hz, 1H), 7.12 – 7.03 (m, 1H), 6.78 – 6.68 (m, 2H), 3.89 (s, 1H), 3.70 (s, 3H), 3.41 (dd,  $J = 14.3, 9.7$  Hz, 1H), 3.30 (s, 3H), 3.27 – 3.17 (m, 1H), 2.62 (m, 2H), 2.48 (dd,  $J = 18.5, 4.0$  Hz, 1H), 2.06 (s, 3H).  $^{13}\text{C NMR}$  (100 MHz,  $\text{CDCl}_3$ , ppm)  $\delta$  205.1, 177.7, 169.5, 160.8, 140.0, 131.1, 131.1, 123.4,

120.3, 118.0, 116.0, 115.7, 114.6, 112.5, 99.0, 63.6, 55.2, 44.3, 43.0, 42.9, 42.2, 39.2, 30.0. **HPLC**: Chiralpak IA (250 mm); detected at 280 nm; *n*-hexane/*i*-propanol = 90/10, flow = 1.0 mL/min; Retention time: 25.947 min (major), 35.451 min (minor). **HRMS (ESI)**: calcd for  $\text{C}_{25}\text{H}_{24}\text{N}_3\text{O}_5\text{S}$   $[\text{M}+\text{H}]^+$  478.1431, found 478.1429.

**methyl 4-((2*R*,2'*S*,5'*S*,*E*)-4',4'-dicyano-3-((methylsulfonyl)imino)-2'-(2-oxopropyl)-3*H*-spiro[benzofuran-2,1'-cyclopentan]-5'-yl)benzoate (3f)**

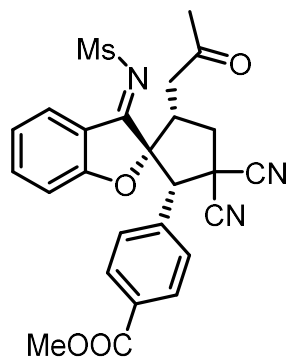

White solid, 48.0mg. 95% yield.  $R_f = 0.3$  (petroleum ether/ethyl acetate = 2:1), 5:1 dr.  $M_p = 106.9\text{--}107.8\text{ }^\circ\text{C}$ ,  $[\alpha]_D^{25} = +58.33$  ( $c = 0.228$ ,  $\text{CHCl}_3$ ). 92% ee.  $^1\text{H NMR}$  (400 MHz,  $\text{CDCl}_3$ , ppm)  $\delta$  8.27 (d,  $J = 8.1$  Hz, 1H), 7.89 (d,  $J = 8.3$  Hz, 2H), 7.65 (ddd,  $J = 8.6, 7.2, 1.4$  Hz, 1H), 7.54 – 7.48 (m, 2H), 7.20 (d,  $J = 8.4$  Hz, 1H), 7.07 (t,  $J = 7.7$  Hz, 1H), 3.97 (s, 1H), 3.84 (s, 3H), 3.45 (dd,  $J = 14.3, 9.6$  Hz, 1H), 3.30 (s, 3H), 3.26

(dd,  $J = 9.5, 4.2$  Hz, 1H), 2.75 – 2.58 (m, 2H), 2.50 (dd,  $J = 18.5, 4.2$  Hz, 1H), 2.06 (s, 3H).  $^{13}\text{C NMR}$  (100 MHz,  $\text{CDCl}_3$ , ppm)  $\delta$  204.9, 177.0, 169.2, 166.1, 140.2, 133.2, 131.7, 131.1, 130.2, 129.9, 123.6, 117.7, 115.5, 115.1, 112.3, 98.5, 63.5, 52.3, 44.4, 43.1, 42.9, 42.0, 38.6, 29.9. **HPLC**: Chiralpak IA (250 mm); detected at 280 nm; *n*-hexane/*i*-propanol = 90/10, flow = 1.0 mL/min; Retention time: 30.627 min (major), 47.157 min (minor). **HRMS (ESI)**: calcd for  $\text{C}_{26}\text{H}_{24}\text{N}_3\text{O}_6\text{S}$   $[\text{M}+\text{H}]^+$  506.1381, found 506.1377.

**N-((2*R*,2'*S*,5'*S*,*E*)-3',3'-dicyano-2'-(4-fluorophenyl)-5'-(2-oxopropyl)-3*H*-spiro[benzofuran-2,1'-cyclopentan]-3-ylidene)methanesulfonamide (3g)**

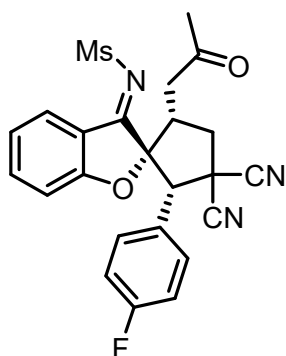

White solid, 44.2 mg. 95% yield.  $R_f = 0.3$  (petroleum ether/ethyl acetate= 2:1), 5:1 dr.  $M_p = 93.8\text{--}95.9\text{ }^\circ\text{C}$ ,  $[\alpha]_D^{25} = +52.43$  ( $c = 0.206$ ,  $\text{CHCl}_3$ ). 90% ee.  **$^1\text{H NMR}$**  (400 MHz,  $\text{CDCl}_3$ , ppm)  $\delta$  8.29 (d,  $J = 8.2$  Hz, 1H), 7.66 (ddd,  $J = 8.5, 7.2, 1.4$  Hz, 1H), 7.42 (dd,  $J = 8.6, 5.2$  Hz, 2H), 7.19 (d,  $J = 8.4$  Hz, 1H), 7.09 (t,  $J = 7.7$  Hz, 1H), 6.92 (t,  $J = 8.6$  Hz, 2H), 3.91 (s, 1H), 3.42 (dd,  $J = 14.3, 9.7$  Hz, 1H), 3.30 (s, 3H), 3.24 (dd,  $J = 9.5, 4.1$  Hz, 1H), 2.73 – 2.57 (m, 2H), 2.49 (dd,  $J = 18.5, 4.2$  Hz, 1H), 2.06 (s, 3H).  **$^{13}\text{C NMR}$**  (100 MHz,  $\text{CDCl}_3$ , ppm)  $\delta$  205.1, 177.4, 169.4, 163.7 (d,  $J = 250.4$  Hz), 140.2, 131.9(d,  $J=8.5$  Hz), 131.2, 124.4(d,  $J=3.4$  Hz), 123.6, 117.9, 116.4(d,  $J=21.7$  Hz), 115.7, 115.4, 112.4, 98.7, 63.3, 44.3, 43.0, 42.2, 39.0, 30.0.  **$^{19}\text{F NMR}$**  (377 MHz,  $\text{CDCl}_3$ , ppm)  $\delta$   $-110.5$ (s). **HPLC**: Chiralpak IA (250 mm); detected at 280 nm; *n*-hexane/*i*-propanol = 90/10, flow = 1.0 mL/min; Retention time: 20.360 min (major), 27.069 min (minor). **HRMS (ESI)**: calcd for  $\text{C}_{24}\text{H}_{21}\text{FN}_3\text{O}_4\text{S}$   $[\text{M}+\text{H}]^+$  466.1232, found 466.1232.

**N-((2*R*,2'*S*,5'*S*,*E*)-2'-(4-bromophenyl)-3',3'-dicyano-5'-(2-oxopropyl)-3*H*-spiro[benzofuran-2,1'-cyclopentan]-3-ylidene)methanesulfonamide (3h)**

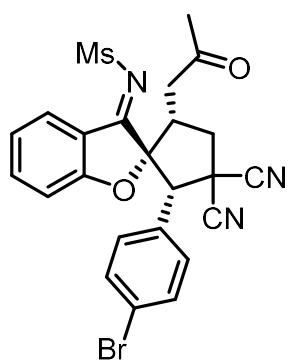

White solid, 50.0 mg. 95% yield.  $R_f = 0.3$  (petroleum ether/ethyl acetate= 2:1), 5:1 dr.  $M_p = 99.6\text{--}101.4\text{ }^\circ\text{C}$ ,  $[\alpha]_D^{25} = +44.91$  ( $c = 0.190$ ,  $\text{CHCl}_3$ ). 89% ee.  **$^1\text{H NMR}$**  (400 MHz,  $\text{CDCl}_3$ , ppm)  $\delta$  8.30 (d,  $J = 8.2$  Hz, 1H), 7.67 (ddd,  $J = 8.6, 7.3, 1.4$  Hz, 1H), 7.41 – 7.33 (m, 2H), 7.33 – 7.27 (m, 2H), 7.19 (d,  $J = 8.5$  Hz, 1H), 7.10 (ddd,  $J = 8.2, 7.2, 0.9$  Hz, 1H), 3.89 (s, 1H), 3.42 (dd,  $J = 14.3, 9.6$  Hz, 1H), 3.30 (s, 3H), 3.27 – 3.15 (m, 1H), 2.71 – 2.56 (m, 2H), 2.48 (dd,  $J = 18.5, 4.2$  Hz, 1H), 2.05 (s, 3H).  **$^{13}\text{C NMR}$**  (100 MHz,  $\text{CDCl}_3$ , ppm)  $\delta$  204.9, 177.1, 169.2, 140.2, 132.4, 131.3, 131.1, 127.4, 124.7, 123.6, 117.7, 115.5, 115.2, 112.3, 98.5, 63.1, 44.4, 42.9, 42.9, 42.0, 38.8, 29.9. **HPLC**: Chiralpak IA (250 mm); detected at 280 nm; *n*-hexane/*i*-propanol = 90/10, flow = 1.0 mL/min; Retention time: 24.323 min (major), 29.952 min (minor). **HRMS (ESI)**: calcd for  $\text{C}_{24}\text{H}_{21}\text{BrN}_3\text{O}_4\text{S}$   $[\text{M}+\text{H}]^+$  526.0431, found 526.0429.

**N-((2*R*,2'*S*,5'*S*,*E*)-3',3'-dicyano-5'-(2-oxopropyl)-2'-(4-(trifluoromethyl)phenyl)-3*H*-spiro[benzofuran-2,1'-cyclopentan]-3-ylidene)methanesulfonamide (3i)**

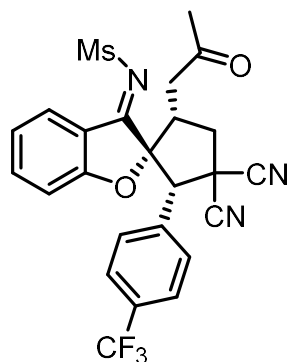

White solid, 49.0 mg. 96% yield.  $R_f = 0.3$  (petroleum ether/ethyl acetate = 2:1), 4:1 dr.  $M_p = 94.5\text{--}97.0\text{ }^\circ\text{C}$ ,  $[\alpha]_D^{25} = +41.67$  ( $c = 0.172$ ,  $\text{CHCl}_3$ ). 87% ee.  **$^1\text{H NMR}$**  (400 MHz,  $\text{CDCl}_3$ , ppm)  $\delta$  8.30 (d,  $J = 8.0$  Hz, 1H), 7.67 (t,  $J = 7.8$  Hz, 1H), 7.57 (d,  $J = 8.2$  Hz, 2H), 7.50 (d,  $J = 8.3$  Hz, 2H), 7.20 (d,  $J = 8.4$  Hz, 1H), 7.10 (t,  $J = 7.7$  Hz, 1H), 3.99 (s, 1H), 3.44 (dd,  $J = 14.3, 9.7$  Hz, 1H), 3.31 (s, 3H), 3.29 – 3.21 (m, 1H), 2.78 – 2.58 (m, 2H), 2.50 (dd,  $J = 18.5, 3.9$  Hz, 1H), 2.05 (s, 3H).  **$^{13}\text{C NMR}$**  (100 MHz,  $\text{CDCl}_3$ , ppm)  $\delta$  204.8, 176.9, 169.1, 140.2, 132.5, 132.2 (q,  $J = 33.0$  Hz), 131.2, 130.2, 126.14 (q,  $J = 3.7$  Hz), 123.8, 123.6 (q,  $J = 272.6$  Hz), 117.8, 115.5, 115.2, 112.4, 98.5, 83.2, 44.7, 43.1, 43.0, 42.0, 38.9, 30.0.  **$^{19}\text{F NMR}$**  (377 MHz,  $\text{CDCl}_3$ , ppm)  $\delta$  –63.1 (s). **HPLC**: Chiralpak IA (250 mm); detected at 280 nm; *n*-hexane/*i*-propanol = 90/10, flow = 1.0 mL/min; Retention time: 17.774 min (major), 23.898 min (minor). **HRMS (ESI)**: calcd for  $\text{C}_{25}\text{H}_{21}\text{F}_3\text{N}_3\text{O}_4\text{S}$   $[\text{M}+\text{H}]^+$  516.1200, found 516.1191.

**N-((2*R*,2'*S*,5'*S*,*E*)-3',3'-dicyano-5'-(2-oxopropyl)-2'-(*m*-tolyl)-3*H*-spiro[benzofuran-2,1'-cyclopentan]-3-ylidene)methanesulfonamide (3j)**

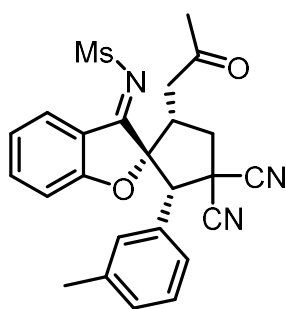

White solid, 42.8 mg. 94% yield.  $R_f = 0.3$  (petroleum ether/ethyl acetate = 2:1), 6:1 dr.  $M_p = 83.2\text{--}84.8\text{ }^\circ\text{C}$ ,  $[\alpha]_D^{25} = +57.50$  ( $c = 0.240$ ,  $\text{CHCl}_3$ ). 90% ee.  **$^1\text{H NMR}$**  (400 MHz,  $\text{CDCl}_3$ , ppm)  $\delta$  8.27 (d,  $J = 8.2$  Hz, 1H), 7.64 (ddd,  $J = 8.6, 7.2, 1.4$  Hz, 1H), 7.25 – 7.15 (m, 3H), 7.07 (dt,  $J = 12.7, 7.6$  Hz, 3H), 3.87 (s, 1H), 3.42 (dd,  $J = 14.3, 9.6$  Hz, 1H), 3.30 (s, 3H), 3.23 (m, 1H), 2.70 – 2.56 (m, 2H), 2.49 (dd,  $J = 18.5, 4.1$  Hz, 1H), 2.21 (s, 3H), 2.06 (s, 3H).  **$^{13}\text{C NMR}$**  (100 MHz,  $\text{CDCl}_3$ , ppm)  $\delta$  205.1, 177.6, 169.5, 140.0, 138.8, 131.1, 130.8, 130.7, 128.9, 128.4, 126.7, 123.4, 118.0, 115.9, 115.6, 112.4, 98.9, 63.9, 44.3, 43.2, 43.0, 42.2, 39.0, 30.0, 21.4. **HPLC**: Chiralpak IA (250 mm); detected at 280 nm; *n*-hexane/*i*-propanol = 90/10, flow = 1.0 mL/min; Retention time: 16.636 min (major), 20.497 min (minor). **HRMS (ESI)**: calcd for  $\text{C}_{25}\text{H}_{24}\text{N}_3\text{O}_4\text{S}$   $[\text{M}+\text{H}]^+$  462.1482, found 462.1488.

**N-((2*R*,2'*S*,5'*S*,*E*)-3',3'-dicyano-2'-(3-methoxyphenyl)-5'-(2-oxopropyl)-3*H*-spiro[benzofuran-2,1'-cyclopentan]-3-ylidene)methanesulfonamide (3k)**

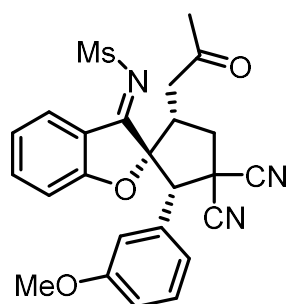

White solid, 44.9 mg. 94% yield.  $R_f = 0.3$  (petroleum ether/ethyl acetate = 2:1), 6:1 dr.  $M_p = 135.6\text{--}136.9^\circ\text{C}$ ,  $[\alpha]_D^{25} = +57.79$  ( $c = 0.184$ ,  $\text{CHCl}_3$ ). 90% ee.  **$^1\text{H NMR}$**  (400 MHz,  $\text{CDCl}_3$ , ppm)  $\delta$  8.30 (d,  $J = 8.2$  Hz, 1H), 7.65 (ddd,  $J = 8.6, 7.2, 1.4$  Hz, 1H), 7.19 (d,  $J = 8.4$  Hz, 1H), 7.17 – 7.04 (m, 2H), 7.01 – 6.93 (m, 2H), 6.79 (ddd,  $J = 8.3, 2.4, 1.1$  Hz, 1H), 3.89 (s, 1H), 3.67 (s, 3H), 3.42 (dd,  $J = 14.3, 9.8$  Hz, 1H), 3.30 (s, 3H), 3.23 (dt,  $J = 9.3, 4.7$  Hz, 1H), 2.64 (ddd,  $J = 16.7, 9.6, 2.4$  Hz, 2H), 2.49 (dd,  $J = 18.5, 4.3$  Hz, 1H), 2.06 (s, 3H).  **$^{13}\text{C NMR}$**  (100 MHz,  $\text{CDCl}_3$ , ppm)  $\delta$  205.1, 177.5, 169.5, 159.8, 140.0, 131.2, 130.1, 129.8, 123.5, 122.1, 118.0, 116.0, 115.8, 115.6, 115.0, 112.4, 98.8, 63.8, 55.3, 44.4, 43.2, 43.0, 42.2, 39.0, 30.0. **HPLC**: Chiralpak IA (250 mm); detected at 280 nm; *n*-hexane/*i*-propanol = 90/10, flow = 1.0 mL/min; Retention time: 23.936 min (major), 29.150 min (minor). **HRMS (ESI)**: calcd for  $\text{C}_{25}\text{H}_{24}\text{N}_3\text{O}_5\text{S}$   $[\text{M}+\text{H}]^+$  478.1431, found 478.1431.

**N-((2*R*,2'*S*,5'*S*,*E*)-3',3'-dicyano-2'-(3-fluorophenyl)-5'-(2-oxopropyl)-3*H*-spiro[benzofuran-2,1'-cyclopentan]-3-ylidene)methanesulfonamide (3l)**

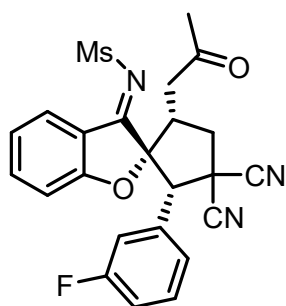

White solid, 43.8 mg. 95% yield.  $R_f = 0.3$  (petroleum ether/ethyl acetate = 2:1), 5:1 dr.  $M_p = 83.6\text{--}85.5^\circ\text{C}$ ,  $[\alpha]_D^{25} = +13.54$  ( $c = 0.288$ ,  $\text{CHCl}_3$ ). 90% ee.  **$^1\text{H NMR}$**  (400 MHz,  $\text{CDCl}_3$ , ppm)  $\delta$  8.30 (d,  $J = 8.2$  Hz, 1H), 7.68 (ddd,  $J = 8.5, 7.2, 1.4$  Hz, 1H), 7.25 – 7.14 (m, 4H), 7.10 (t,  $J = 7.7$  Hz, 1H), 7.03 – 6.93 (m, 1H), 3.91 (s, 1H), 3.44 (dd,  $J = 14.4, 9.7$  Hz, 1H), 3.31 (s, 3H), 3.24 (dd,  $J = 9.5, 4.0$  Hz, 1H), 2.74 – 2.56 (m, 2H), 2.49 (dd,  $J = 18.5, 4.2$  Hz, 1H), 2.07 (s, 3H).  **$^{13}\text{C NMR}$**  (100 MHz,  $\text{CDCl}_3$ , ppm)  $\delta$  205.1, 177.2, 169.3, 162.7 (d,  $J = 247.8$  Hz), 140.3, 131.2, 130.8 (d,  $J = 8.4$  Hz), 130.7, 125.9 (d,  $J = 3.2$  Hz), 123.7, 117.8, 117.4 (d,  $J = 21.0$  Hz), 116.8 (d,  $J = 23.2$  Hz), 115.4, 115.6, 115.2, 112.5, 98.6, 63.2, 44.5, 43.1, 43.0, 42.1, 38.9, 30.0.  **$^{19}\text{F NMR}$**  (377 MHz,  $\text{CDCl}_3$ , ppm)  $\delta$  –110.8(s). **HPLC**: Chiralpak IA (250 mm); detected at 280 nm; *n*-hexane/*i*-propanol = 90/10, flow = 1.0 mL/min; Retention time: 23.828 min (major), 30.781 min (minor). **HRMS (ESI)**: calcd for  $\text{C}_{24}\text{H}_{21}\text{FN}_3\text{O}_4\text{S}$   $[\text{M}+\text{H}]^+$  466.1232, found 466.1222.

**N-((2*R*,2'*S*,5'*S*,*E*)-2'-(3-chlorophenyl)-3',3'-dicyano-5'-(2-oxopropyl)-3*H*-spiro[benzofuran-2,1'-cyclopentan]-3-ylidene)methanesulfonamide (3*m*)**

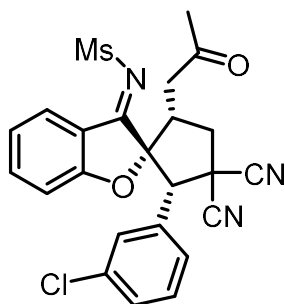

White solid, 42.9 mg. 94% yield.  $R_f = 0.3$  (petroleum ether/ethyl acetate = 2:1), 5:1 dr.  $M_p = 75.3\text{--}77.9^\circ\text{C}$ ,  $[\alpha]_D^{25} = +42.54$  ( $c = 0.286$ ,  $\text{CHCl}_3$ ). 91% ee.  $^1\text{H NMR}$  (400 MHz,  $\text{CDCl}_3$ , ppm)  $\delta$  8.29 (d,  $J = 8.2$  Hz, 1H), 7.67 (ddd,  $J = 8.5$ , 7.2, 1.4 Hz, 1H), 7.45 (t,  $J = 2.0$  Hz, 1H), 7.29 (dt,  $J = 7.8$ , 1.5 Hz, 1H), 7.25 – 7.13 (m, 3H), 7.09 (ddd,  $J = 8.2$ , 7.2, 0.9 Hz, 1H), 3.88 (s, 1H), 3.43 (dd,  $J = 14.4$ , 9.7 Hz, 1H), 3.30 (s, 3H), 3.23 (dt,  $J = 13.6$ , 6.8 Hz, 1H), 2.72 – 2.56 (m, 2H), 2.50 (dd,  $J = 18.5$ , 4.3 Hz, 1H), 2.05 (s, 3H).  $^{13}\text{C NMR}$  (100 MHz,  $\text{CDCl}_3$ , ppm)  $\delta$  205.0, 177.1, 169.3, 140.2, 135.0, 131.2, 130.5, 130.4, 129.9, 128.1, 123.7, 117.8, 115.6, 115.2, 112.4, 98.6, 63.2, 44.4, 43.1, 43.0, 42.1, 38.8, 30.0. **HPLC**: Chiralpak IA (250 mm); detected at 280 nm; *n*-hexane/*i*-propanol = 90/10, flow = 1.0 mL/min; Retention time: 20.238 min (major), 25.830 min (minor). **HRMS (ESI)**: calcd for  $\text{C}_{24}\text{H}_{21}\text{ClN}_3\text{O}_4\text{S}$   $[\text{M}+\text{H}]^+$  482.0936, found 482.0936.

**N-((2*R*,2'*S*,5'*S*,*E*)-2'-(3-bromophenyl)-3',3'-dicyano-5'-(2-oxopropyl)-3*H*-spiro[benzofuran-2,1'-cyclopentan]-3-ylidene)methanesulfonamide (3*n*)**

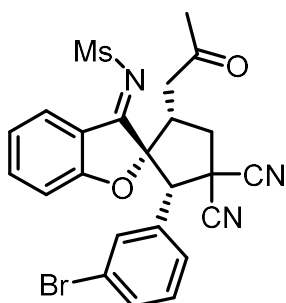

White solid, 49.9 mg. 96% yield.  $R_f = 0.3$  (petroleum ether/ethyl acetate = 2:1), 5:1 dr.  $M_p = 73.7\text{--}75.9^\circ\text{C}$ ,  $[\alpha]_D^{25} = +44.33$  ( $c = 0.200$ ,  $\text{CHCl}_3$ ). 90% ee.  $^1\text{H NMR}$  (400 MHz,  $\text{CDCl}_3$ , ppm)  $\delta$  8.29 (d,  $J = 8.2$  Hz, 1H), 7.67 (ddd,  $J = 8.6$ , 7.2, 1.4 Hz, 1H), 7.60 (d,  $J = 1.9$  Hz, 1H), 7.40 (ddd,  $J = 8.0$ , 1.9, 1.0 Hz, 1H), 7.34 (dt,  $J = 7.9$ , 1.3 Hz, 1H), 7.22 (d,  $J = 8.5$  Hz, 1H), 7.16 – 7.01 (m, 2H), 3.86 (s, 1H), 3.43 (dd,  $J = 14.3$ , 9.7 Hz, 1H), 3.30 (s, 3H), 3.27 – 3.18 (m, 1H), 2.74 – 2.56 (m, 2H), 2.50 (dd,  $J = 18.5$ , 4.3 Hz, 1H), 2.05 (s, 3H).  $^{13}\text{C NMR}$  (100 MHz,  $\text{CDCl}_3$ , ppm)  $\delta$  205.1, 177.5, 169.5, 159.8, 140.0, 131.2, 130.0, 129.8, 123.5, 122.1, 118.0, 116.0, 115.8, 115.6, 115.0, 112.4, 98.8, 63.8, 55.3, 44.4, 43.2, 43.0, 42.2, 39.0, 30.0. **HPLC**: Chiralpak IA (250 mm); detected at 280 nm; *n*-hexane/*i*-propanol = 90/10, flow = 1.0 mL/min; Retention time: 21.632 min (major), 27.283 min (minor). **HRMS (ESI)**: calcd for  $\text{C}_{24}\text{H}_{21}\text{BrN}_3\text{O}_4\text{S}$   $[\text{M}+\text{H}]^+$  526.0431, found 526.0430.

**N-((2*R*,2'*S*,5'*S*,*E*)-3',3'-dicyano-5'-(2-oxopropyl)-2'-(3-(trifluoromethyl)phenyl)-3H-spiro[benzofuran-2,1'-cyclopentan]-3-ylidene)methanesulfonamide (3o)**

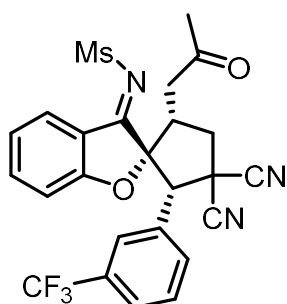

White solid, 46.9 mg. 91% yield.  $R_f = 0.3$  (petroleum ether/ethyl acetate = 2:1), 5:1 dr.  $M_p = 81.2\text{--}83.4^\circ\text{C}$ ,  $[\alpha]_D^{25} = +20.83$  ( $c = 0.296$ ,  $\text{CHCl}_3$ ). 91% ee.  **$^1\text{H NMR}$**  (400 MHz,  $\text{CDCl}_3$ , ppm)  $\delta$  8.27 (d,  $J = 8.2$  Hz, 1H), 7.78 (s, 1H), 7.66 (ddd,  $J = 8.6, 7.2, 1.4$  Hz, 1H), 7.55 (t,  $J = 7.6$  Hz, 2H), 7.38 (t,  $J = 7.8$  Hz, 1H), 7.21 (d,  $J = 8.4$  Hz, 1H), 7.08 (t,  $J = 7.7$  Hz, 1H), 3.97 (s, 1H), 3.46 (dd,  $J = 14.3, 9.6$  Hz, 1H), 3.31 (s, 3H), 3.27 (dd,  $J = 9.5, 4.1$  Hz, 1H), 2.76 – 2.59 (m, 2H), 2.52 (dd,  $J = 18.5, 4.3$  Hz, 1H), 2.08 (s, 3H).  **$^{13}\text{C NMR}$**  (100 MHz,  $\text{CDCl}_3$ , ppm)  $\delta$  205.0, 177.0, 169.2, 140.3, 133.5, 131.5(q,  $J = 32.9$  Hz), 131.1, 129.8, 129.6, 127.0(q,  $J = 3.3$  Hz), 126.6(q,  $J = 3.8$  Hz), 123.7, 123.5(q,  $J = 272.4$  Hz), 117.8, 115.5, 115.1, 112.4, 98.6, 63.5, 44.2, 43.1, 43.0, 42.1, 38.7, 30.0.  **$^{19}\text{F NMR}$**  (377 MHz,  $\text{CDCl}_3$ , ppm)  $\delta$  –63.1(s). **HPLC**: Chiralpak IA (250 mm); detected at 280 nm; *n*-hexane/*i*-propanol = 90/10, flow = 1.0 mL/min; Retention time: 18.094 min (major), 25.218 min (minor). **HRMS (ESI)**: calcd for  $\text{C}_{25}\text{H}_{21}\text{F}_3\text{N}_3\text{O}_4\text{S}$   $[\text{M}+\text{H}]^+$  516.1200, found 516.1195.

**N-((2*R*,2'*S*,5'*S*,*E*)-3',3'-dicyano-2'-(3-nitrophenyl)-5'-(2-oxopropyl)-3H-spiro[benzofuran-2,1'-cyclopentan]-3-ylidene)methanesulfonamide (3p)**

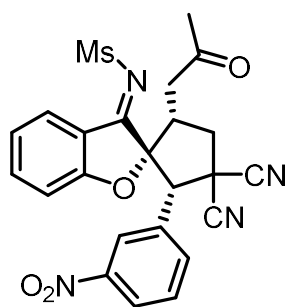

White solid, 46.3 mg. 95% yield.  $R_f = 0.3$  (petroleum ether/ethyl acetate = 2:1), 6:1 dr.  $M_p = 98.1\text{--}99.2^\circ\text{C}$ ,  $[\alpha]_D^{25} = +4.88$  ( $c = 0.328$ ,  $\text{CHCl}_3$ ). 94% ee.  **$^1\text{H NMR}$**  (400 MHz,  $\text{CDCl}_3$ , ppm)  $\delta$  8.42 (t,  $J = 2.1$  Hz, 1H), 8.28 (d,  $J = 8.2$  Hz, 1H), 8.16 (ddd,  $J = 8.3, 2.3, 1.0$  Hz, 1H), 7.79 – 7.60 (m, 2H), 7.47 (t,  $J = 8.0$  Hz, 1H), 7.27 (d,  $J = 9.6$  Hz, 1H), 7.15 – 7.04 (m, 1H), 4.04 (s, 1H), 3.48 (dd,  $J = 14.4, 9.6$  Hz, 1H), 3.33 (s, 3H), 3.27 (dt,  $J = 9.4, 4.7$  Hz, 1H), 2.76 – 2.61 (m, 2H), 2.52 (dd,  $J = 18.5, 4.3$  Hz, 1H), 2.08 (s, 3H).  **$^{13}\text{C NMR}$**  (100 MHz,  $\text{CDCl}_3$ , ppm)  $\delta$  204.8, 176.6, 169.0, 148.3, 140.4, 135.9, 131.1, 130.5, 130.2, 125.0, 124.8, 123.8, 117.6, 115.2, 114.8, 112.5, 98.4, 62.8, 44.3, 42.9, 41.9, 38.7, 29.9. **HPLC**: Chiralpak IA (250 mm); detected at 265 nm; *n*-hexane/*i*-propanol = 90/10, flow = 1.0 mL/min; Retention time: 36.138 min (major), 50.420 min (minor). **HRMS (ESI)**: calcd for  $\text{C}_{26}\text{H}_{26}\text{N}_3\text{O}_4\text{S}$   $[\text{M}+\text{H}]^+$  493.1177, found 493.1176.

**N-((2*R*,2'*S*,5'*S*,*E*)-3',3'-dicyano-2'-(3,4-dimethylphenyl)-5'-(2-oxopropyl)-3*H*-spiro[benzofuran-2,1'-cyclopentan]-3-ylidene)methanesulfonamide (3q)**

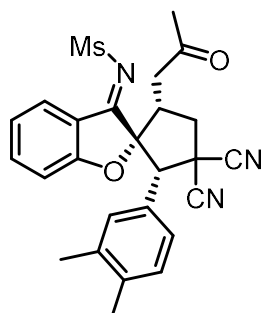

White solid, 43.8 mg. 92% yield.  $R_f = 0.3$  (petroleum ether/ethyl acetate = 2:1), 4:1 dr.  $M_p = 111.7\text{--}114.2^\circ\text{C}$ ,  $[\alpha]_D^{25} = +63.09$  ( $c = 0.140$ ,  $\text{CHCl}_3$ ). 94% ee.  **$^1\text{H NMR}$**  (400 MHz,  $\text{CDCl}_3$ , ppm)  $\delta$  8.28 (d,  $J = 8.2$  Hz, 1H), 7.65 (ddd,  $J = 8.5, 7.2, 1.4$  Hz, 1H), 7.20 (d,  $J = 8.4$  Hz, 1H), 7.18 – 7.10 (m, 2H), 7.06 (ddd,  $J = 8.2, 7.2, 0.9$  Hz, 1H), 6.95 (d,  $J = 7.8$  Hz, 1H), 3.86 (s, 1H), 3.41 (dd,  $J = 14.3, 9.7$  Hz, 1H), 3.29 (s, 3H), 3.27 – 3.15 (m, 1H), 2.62 (ddd,  $J = 16.6, 9.7, 2.3$  Hz, 2H), 2.47 (dd,  $J = 18.5, 4.1$  Hz, 1H), 2.11 (s, 6H), 2.06 (s, 3H).  **$^{13}\text{C NMR}$**  (100 MHz,  $\text{CDCl}_3$ , ppm)  $\delta$  205.1, 177.7, 169.6, 139.9, 138.7, 137.3, 131.1, 131.1, 130.4, 127.0, 125.8, 123.4, 118.1, 116.0, 115.7, 112.4, 99.0, 63.7, 44.5, 43.1, 43.0, 42.2, 39.2, 30.0, 19.8, 19.5. **HPLC**: Chiralpak IA (250 mm); detected at 280 nm; *n*-hexane/*i*-propanol = 90/10, flow = 1.0 mL/min; Retention time: 18.421 min (major), 23.572 min (minor). **HRMS (ESI)**: calcd for  $\text{C}_{26}\text{H}_{26}\text{N}_3\text{O}_4\text{S}$   $[\text{M}+\text{H}]^+$  476.1639, found 476.1632.

**N-((2*R*,2'*R*,5'*S*,*E*)-3',3'-dicyano-2'-(2-methoxyphenyl)-5'-(2-oxopropyl)-3*H*-spiro[benzofuran-2,1'-cyclopentan]-3-ylidene)methanesulfonamide (3r)**

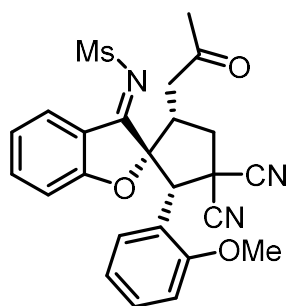

White solid, 44.8 mg. 95% yield.  $R_f = 0.3$  (petroleum ether/ethyl acetate = 2:1), 12:1 dr.  $M_p = 60.4\text{--}62.7^\circ\text{C}$ ,  $[\alpha]_D^{25} = +23.83$  ( $c = 0.214$ ,  $\text{CHCl}_3$ ). 82% ee.  **$^1\text{H NMR}$**  (400 MHz,  $\text{CDCl}_3$ , ppm)  $\delta$  8.26 (d,  $J = 8.2$  Hz, 1H), 7.62 (ddd,  $J = 14.5, 8.2, 1.5$  Hz, 2H), 7.23 – 7.14 (m, 2H), 7.05 (t,  $J = 7.7$  Hz, 1H), 6.82 (d,  $J = 8.3$  Hz, 1H), 6.78 – 6.71 (m, 1H), 4.99 (s, 1H), 3.83 (s, 3H), 3.44 (dd,  $J = 14.1, 9.4$  Hz, 1H), 3.27 (s, 4H), 2.73 – 2.54 (m, 2H), 2.48 (dd,  $J = 18.5, 4.2$  Hz, 1H), 2.06 (s, 3H).  **$^{13}\text{C NMR}$**  (100 MHz,  $\text{CDCl}_3$ , ppm)  $\delta$  205.2, 177.4, 169.4, 157.6, 139.8, 130.9, 130.9, 129.9, 123.3, 120.9, 117.9, 117.4, 116.0, 115.8, 112.5, 111.3, 99.5, 56.1, 53.2, 44.4, 43.4, 43.0, 42.1, 38.5, 30.0. **HPLC**: Chiralpak IA (250 mm); detected at 280 nm; *n*-hexane/*i*-propanol = 90/10, flow = 1.0 mL/min; Retention time: 21.191 min (major), 30.190 min (minor). **HRMS (ESI)**: calcd for  $\text{C}_{25}\text{H}_{24}\text{N}_3\text{O}_5\text{S}$   $[\text{M}+\text{H}]^+$  478.1431, found 478.1436.

**N-((2R,2'S,5'S,E)-3',3'-dicyano-5'-(2-oxopropyl)-2'-(o-tolyl)-3H-spiro[benzofuran-2,1'-cyclopentan]-3-ylidene)methanesulfonamide (3s)**

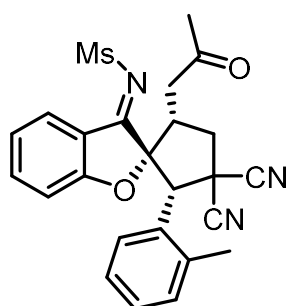

White solid, 43.8 mg. 95% yield.  $R_f = 0.3$  (petroleum ether/ethyl acetate = 2:1), 7:1 dr.  $M_p = 88.1-90.0^\circ\text{C}$ ,  $[\alpha]_D^{25} = +38.36$  ( $c = 0.232$ ,  $\text{CHCl}_3$ ). 71% ee.  **$^1\text{H NMR}$**  (400 MHz,  $\text{CDCl}_3$ , ppm)  $\delta$  8.26 (d,  $J = 8.1$  Hz, 1H), 7.77 – 7.69 (m, 1H), 7.64 (ddd,  $J = 8.5, 7.2, 1.4$  Hz, 1H), 7.21 (d,  $J = 8.5$  Hz, 1H), 7.16 – 7.08 (m, 2H), 7.08 – 6.99 (m, 2H), 4.54 (s, 1H), 3.48 (dd,  $J = 14.3, 9.4$  Hz, 1H), 3.32 (dt,  $J = 9.6, 4.8$  Hz, 1H), 3.28 (s, 3H), 2.72 – 2.57 (m, 2H), 2.47 (m, 4H), 2.06 (s, 3H).  **$^{13}\text{C NMR}$**  (100 MHz,  $\text{CDCl}_3$ , ppm)  $\delta$  205.1, 177.7, 169.6, 140.1, 137.7, 131.3, 131.1, 129.7, 129.4, 127.1, 126.5, 123.4, 117.8, 116.1, 115.6, 112.5, 99.7, 57.1, 44.6, 43.5, 43.0, 42.1, 38.7, 30.0, 20.3. **HPLC**: Chiralpak IA (250 mm); detected at 280 nm; *n*-hexane/*i*-propanol = 90/10, flow = 1.0 mL/min; Retention time: 17.869 min (major), 21.950 min (minor). **HRMS (ESI)**: calcd for  $\text{C}_{25}\text{H}_{24}\text{N}_3\text{O}_4\text{S}$   $[\text{M}+\text{H}]^+$  462.1482, found 462.1482.

**N-((2R,2'R,5'S,E)-3',3'-dicyano-2'-(2,4-dichlorophenyl)-5'-(2-oxopropyl)-3H-spiro[benzofuran-2,1'-cyclopentan]-3-ylidene)methanesulfonamide (3t)**

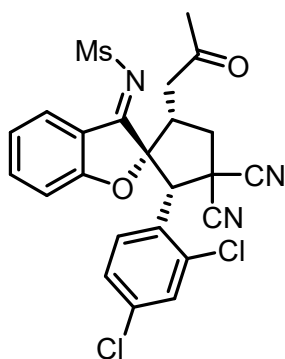

White solid, 41.3 mg. 80% yield.  $R_f = 0.3$  (petroleum ether/ethyl acetate = 2:1), 10:1 dr.  $M_p = 96.6-98.2^\circ\text{C}$ ,  $[\alpha]_D^{25} = -21.01$  ( $c = 0.164$ ,  $\text{CHCl}_3$ ). 70% ee.  **$^1\text{H NMR}$**  (400 MHz,  $\text{CDCl}_3$ , ppm)  $\delta$  8.31 (d,  $J = 8.1$  Hz, 1H), 7.74 (d,  $J = 8.6$  Hz, 1H), 7.72 – 7.66 (m, 1H), 7.42 (d,  $J = 2.3$  Hz, 1H), 7.22 (d,  $J = 8.4$  Hz, 1H), 7.16 – 7.07 (m, 2H), 4.99 (s, 1H), 3.52 (dd,  $J = 14.4, 9.5$  Hz, 1H), 3.30 (s, 4H), 2.77 – 2.54 (m, 2H), 2.45 (dd,  $J = 18.5, 3.9$  Hz, 1H), 2.07 (s, 3H).  **$^{13}\text{C NMR}$**  (100 MHz,  $\text{CDCl}_3$ , ppm)  $\delta$  204.9, 176.0, 169.0, 140.3, 136.8, 136.4, 131.5, 131.3, 130.4, 128.0, 125.3, 123.9, 117.7, 115.2, 115.1, 112.4, 99.3, 55.9, 44.7, 43.3, 43.0, 41.9, 38.1, 30.1. **HPLC**: Chiralpak IA (250 mm); detected at 280 nm; *n*-hexane/*i*-propanol = 90/10, flow = 1.0 mL/min; Retention time: 25.258 min (major), 37.529 min (minor). **HRMS (ESI)**: calcd for  $\text{C}_{24}\text{H}_{20}\text{Cl}_2\text{N}_3\text{O}_4\text{S}$   $[\text{M}+\text{H}]^+$  516.0546, found 516.0546.



**N-((2*R*,2'*S*,5'*S*,*E*)-3',3'-dicyano-5'-(2-oxopropyl)-2'-(thiophen-2-yl)-3*H*-spiro[benzofuran-2,1'-cyclopentan]-3-ylidene)methanesulfonamide (3u)**

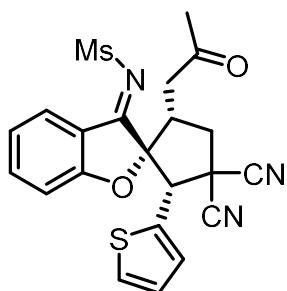

White solid, 43.1 mg. 95% yield.  $R_f = 0.3$  (petroleum ether/ethyl acetate = 2:1), 3:1 dr.  $M_p = 90.1\text{--}92.9^\circ\text{C}$ ,  $[\alpha]_D^{25} = +13.74$  ( $c = 0.182$ ,  $\text{CHCl}_3$ ). 90% ee.  $^1\text{H NMR}$  (400 MHz,  $\text{CDCl}_3$ , ppm)  $\delta$  8.32 (d,  $J = 8.2$  Hz, 1H), 7.69 (ddd,  $J = 8.6, 7.2, 1.4$  Hz, 1H), 7.26 – 7.16 (m, 3H), 7.12 (ddd,  $J = 8.2, 7.2, 0.9$  Hz, 1H), 6.89 (dd,  $J = 5.2, 3.7$  Hz, 1H), 4.32 (s, 1H), 3.41 (dd,  $J = 14.4, 9.8$  Hz, 1H), 3.30 (s, 3H), 3.22 (m, 1H), 2.72 – 2.56 (m, 2H), 2.48 (dd,  $J = 18.5, 4.1$  Hz, 1H), 2.05 (s, 3H).  $^{13}\text{C NMR}$  (100 MHz,  $\text{CDCl}_3$ , ppm)  $\delta$  205.0, 177.2, 169.8, 140.1, 131.1, 129.8, 128.4, 128.2, 127.3, 123.6, 117.9, 115.6, 115.3, 112.9, 98.3, 59.7, 44.3, 43.0, 42.6, 42.2, 40.1, 30.0. **HPLC**: Chiralpak IA (250 mm); detected at 280 nm; *n*-hexane/*i*-propanol = 90/10, flow = 1.0 mL/min; Retention time: 25.703 min (major), 31.571 min (minor). **HRMS (ESI)**: calcd for  $\text{C}_{22}\text{H}_{20}\text{N}_3\text{O}_4\text{S}_2$   $[\text{M}+\text{H}]^+$  454.0890, found 454.0885.

**N-((2*R*,2'*S*,5'*S*,*E*)-2'-(*tert*-butyl)-3',3'-dicyano-5'-(2-oxopropyl)-3*H*-spiro[benzofuran-2,1'-cyclopentan]-3-ylidene)methanesulfonamide (3v)**

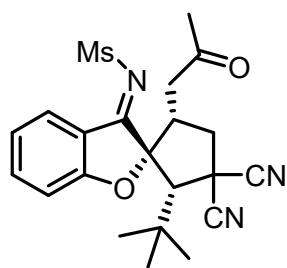

White solid, 38.4 mg. 90% yield.  $R_f = 0.3$  (petroleum ether/ethyl acetate = 2:1), 9:1 dr.  $M_p = 151.5\text{--}154.3^\circ\text{C}$ ,  $[\alpha]_D^{25} = -44.24$  ( $c = 0.220$ ,  $\text{CHCl}_3$ ). 91% ee.  $^1\text{H NMR}$  (400 MHz,  $\text{CDCl}_3$ , ppm)  $\delta$  8.58 – 8.43 (m, 1H), 7.75 (ddd,  $J = 8.5, 7.1, 1.4$  Hz, 1H), 7.32 – 7.11 (m, 3H), 3.37 (dt,  $J = 13.4, 6.7$  Hz, 1H), 3.30 (s, 3H), 3.04 – 2.84 (m, 2H), 2.51 (dd,  $J = 14.0, 12.3$  Hz, 1H), 2.32 (dd,  $J = 18.3, 10.0$  Hz, 1H), 2.20 (dd,  $J = 18.3, 3.4$  Hz, 1H), 2.02 (s, 3H), 1.10 (s, 9H).  $^{13}\text{C NMR}$  (100 MHz,  $\text{CDCl}_3$ , ppm)  $\delta$  204.9, 178.1, 169.3, 140.2, 131.4, 123.6, 118.2, 118.1, 116.5, 113.0, 99.3, 67.2, 46.5, 44.0, 43.2, 40.3, 35.1, 33.8, 30.3, 30.0. **HPLC**: Chiralpak IA (250 mm); detected at 280 nm; *n*-hexane/*i*-propanol = 90/10, flow = 1.0 mL/min; Retention time: 19.552 min (major), 32.208 min (minor). **HRMS (ESI)**: calcd for  $\text{C}_{22}\text{H}_{26}\text{N}_3\text{O}_4\text{S}$   $[\text{M}+\text{H}]^+$  428.1639, found 428.1640.

**N-((2*R*,2'*S*,5'*S*,*E*)-3',3'-dicyano-5-methoxy-5'-(2-oxopropyl)-2'-phenyl-3*H*-spiro[benzofuran-2,1'-cyclopentan]-3-ylidene)methanesulfonamide (3w)**

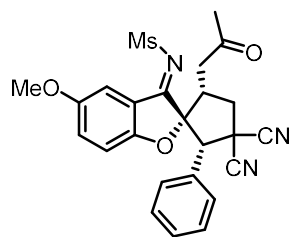

Yellow solid, 44.9 mg. 95% yield.  $R_f = 0.3$  (petroleum ether/ethyl acetate = 2:1), 4:1 dr.  $M_p = 91.6\text{--}93.7^\circ\text{C}$ ,  $[\alpha]_D^{25} = +33.14$  ( $c = 0.174$ ,  $\text{CHCl}_3$ ). 84% ee.  $^1\text{H NMR}$  (400 MHz,  $\text{CDCl}_3$ , ppm)  $\delta$  7.67 (d,  $J = 2.8$  Hz, 1H), 7.47 – 7.36 (m, 2H), 7.31 – 7.19 (m, 5H), 7.12 (d,  $J = 9.1$  Hz, 1H), 3.91 (s, 1H), 3.74 (s, 3H), 3.43 (dd,  $J = 14.3, 9.6$  Hz, 1H), 3.30 (d,  $J = 1.0$  Hz, 3H), 3.23 (dd,  $J = 9.6, 4.0$  Hz, 1H), 2.70 – 2.57 (m, 2H), 2.48 (dd,  $J = 18.5, 4.1$  Hz, 1H), 2.07 (s, 3H).  $^{13}\text{C NMR}$  (100 MHz,  $\text{CDCl}_3$ , ppm)  $\delta$  205.2, 177.7, 165.1, 155.3, 130.8, 130.1, 129.9, 129.2, 128.7, 118.0, 115.9, 115.5, 113.3, 110.1, 99.4, 63.9, 56.0, 44.6, 43.1, 43.0, 42.1, 39.1, 30.1. **HPLC**: Chiralpak IA (250 mm); detected at 280 nm; *n*-hexane/*i*-propanol = 90/10, flow = 1.0 mL/min; Retention time: 16.817 min (minor), 21.647 min (major). **HRMS (ESI)**: calcd for  $\text{C}_{26}\text{H}_{24}\text{N}_3\text{O}_5\text{S}$   $[\text{M}+\text{H}]^+$  478.1431, found 478.1435.

**N-((2*R*,2'*S*,5'*S*,*E*)-3',3'-dicyano-5-methyl-5'-(2-oxopropyl)-2'-phenyl-3*H*-spiro[benzofuran-2,1'-cyclopentan]-3-ylidene)methanesulfonamide (3x)**

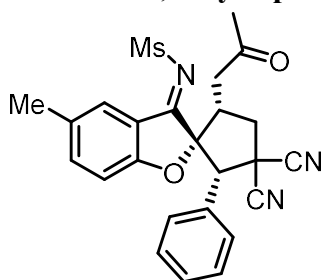

White solid, 42.9 mg. 93% yield.  $R_f = 0.3$  (petroleum ether/ethyl acetate = 2:1), 3:1 dr.  $M_p = 85.6\text{--}87.2^\circ\text{C}$ ,  $[\alpha]_D^{25} = +10.17$  ( $c = 0.436$ ,  $\text{CHCl}_3$ ). 88% ee.  $^1\text{H NMR}$  (400 MHz,  $\text{CDCl}_3$ , ppm)  $\delta$  8.03 (s, 1H), 7.53 – 7.36 (m, 3H), 7.31 – 7.18 (m, 4H), 7.10 (d,  $J = 8.6$  Hz, 1H), 3.91 (s, 1H), 3.43 (dd,  $J = 14.4, 9.6$  Hz, 1H), 3.29 (s, 3H), 3.22 (dd,  $J = 9.5, 3.8$  Hz, 1H), 2.73 – 2.56 (m, 2H), 2.47 (dd,  $J = 18.5, 4.0$  Hz, 1H), 2.29 (s, 3H), 2.06 (s, 3H).  $^{13}\text{C NMR}$  (100 MHz,  $\text{CDCl}_3$ , ppm)  $\delta$  205.2, 177.5, 168.1, 141.7, 133.3, 130.2, 130.1, 129.9, 129.2, 128.7, 117.9, 115.9, 115.6, 112.1, 99.0, 63.8, 44.6, 43.1, 43.0, 42.1, 39.1, 30.0, 21.0. **HPLC**: Chiralpak IA (250 mm); detected at 280 nm; *n*-hexane/*i*-propanol = 90/10, flow = 1.0 mL/min; Retention time: 16.833 min (major), 20.950 min (minor). **HRMS (ESI)**: calcd for  $\text{C}_{25}\text{H}_{24}\text{N}_3\text{O}_4\text{S}$   $[\text{M}+\text{H}]^+$  462.1482, found 462.1479.

**N-((2*R*,2'*S*,5'*S*,*E*)-3',3'-dicyano-6-methoxy-5'-(2-oxopropyl)-2'-phenyl-3*H*-spiro[benzofuran-2,1'-cyclopentan]-3-ylidene)methanesulfonamide (3y)**

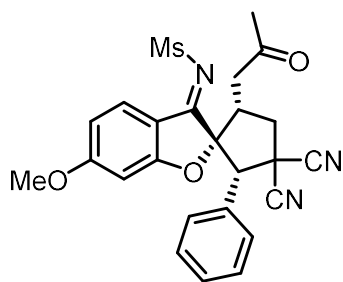

White solid, 45.9 mg. 96% yield.  $R_f = 0.3$  (petroleum ether/ ethyl acetate = 2:1), 5:1 dr.  $M_p = 81.1\text{--}83.2^\circ\text{C}$ ,  $[\alpha]_D^{25} = -49.55$  ( $c = 0.224$ ,  $\text{CHCl}_3$ ). 95% ee.  **$^1\text{H NMR}$**  (400 MHz,  $\text{CDCl}_3$ , ppm)  $\delta$  8.17 (d,  $J = 9.7$  Hz, 1H), 7.46 – 7.35 (m, 2H), 7.33 – 7.17 (m, 4H), 6.67 – 6.53 (m, 2H), 3.92 (d,  $J = 4.4$  Hz, 4H), 3.44 (dd,  $J = 14.4, 9.7$  Hz, 1H), 3.24 (s, 4H), 2.70 – 2.55 (m, 2H), 2.47 (dd,  $J = 18.5, 3.8$  Hz, 1H), 2.09 (s, 3H).  **$^{13}\text{C NMR}$**  (100 MHz,  $\text{CDCl}_3$ , ppm)  $\delta$  205.2, 174.9, 172.4, 170.0, 132.3, 130.1, 129.8, 129.2, 128.7, 115.9, 115.7, 113.3, 111.3, 100.2, 95.3, 63.4, 56.4, 44.2, 43.2, 42.8, 42.1, 39.0, 30.1. **HPLC**: Chiralpak IA (250 mm); detected at 280 nm; *n*-hexane/*i*-propanol = 90/10, flow = 1.0 mL/min; Retention time: 28.643 min (major), 35.055 min (minor). **HRMS (ESI)**: calcd for  $\text{C}_{26}\text{H}_{24}\text{N}_3\text{O}_5\text{S}$   $[\text{M}+\text{H}]^+$  478.1431, found 478.1436.

**N-((1*S*,2*R*,5*S*,*Z*)-3,3-dicyano-5-(2-oxopropyl)-2-phenylspiro[cyclopentane-1,2'-inden]-1'(3'H)-ylidene)methanesulfonamide (3z)**

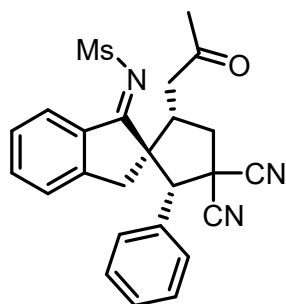

White solid, 46.4 mg. 95% yield.  $R_f = 0.3$  (petroleum ether/ ethyl acetate = 2:1), 6:1 dr.  $M_p = 90.8\text{--}93.7^\circ\text{C}$ ,  $[\alpha]_D^{25} = -11.82$  ( $c = 0.206$ ,  $\text{CHCl}_3$ ). 82% ee.  **$^1\text{H NMR}$**  (400 MHz,  $\text{CDCl}_3$ , ppm)  $\delta$  8.67 (d,  $J = 8.1$  Hz, 1H), 7.65 (td,  $J = 7.5, 1.1$  Hz, 1H), 7.51 – 7.40 (m, 2H), 7.27 (s, 5H), 4.34 (s, 1H), 3.55 – 3.36 (m, 2H), 3.29 (s, 3H), 3.18 – 2.99 (m, 2H), 2.44 (dd,  $J = 14.5, 10.5$  Hz, 1H), 2.32 (dd,  $J = 18.0, 10.2$  Hz, 1H), 2.20 (dd,  $J = 17.9, 3.8$  Hz, 1H), 1.98 (s, 3H).  **$^{13}\text{C NMR}$**  (100 MHz,  $\text{CDCl}_3$ , ppm)  $\delta$  204.9, 184.8, 152.2, 136.5, 132.3, 132.0, 131.2, 129.3, 128.8, 128.6, 127.9, 126.0, 116.6, 116.6, 62.4, 61.3, 45.5, 43.7, 43.4, 42.5, 36.5, 31.6, 30.0. **HPLC**: Chiralpak IA (250 mm); detected at 280 nm; *n*-hexane/*i*-propanol = 93/7, flow = 1.0 mL/min; Retention time: 41.584 min (major), 46.316 min (minor). **HRMS (ESI)**: calcd for  $\text{C}_{25}\text{H}_{24}\text{N}_3\text{O}_3\text{S}$   $[\text{M}+\text{H}]^+$  446.1533, found 446.1536.

**N-((2*R*,2'*S*,5'*S*,*E*)-3',3'-dicyano-5'-(2-oxobutyl)-2'-phenyl-3*H*-spiro[benzofuran-2,1'-cyclopentan]-3-ylidene)methanesulfonamide (3aa)**

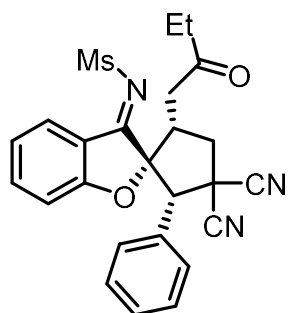

White solid, 44.3 mg. 96% yield.  $R_f = 0.3$  (petroleum ether/ethyl acetate = 4:1), 9:1 dr.  $M_p = 80.8\text{--}82.5^\circ\text{C}$ ,  $[\alpha]_D^{25} = +43.58$  ( $c = 0.218$ ,  $\text{CHCl}_3$ ). 90% ee.  **$^1\text{H NMR}$**  (400 MHz,  $\text{CDCl}_3$ , ppm)  $\delta$  8.26 (d,  $J = 8.2$  Hz, 1H), 7.65 (ddd,  $J = 8.6, 7.2, 1.4$  Hz, 1H), 7.47 – 7.36 (m, 2H), 7.22 (dt,  $J = 13.3, 5.6$  Hz, 4H), 7.06 (t,  $J = 7.7$  Hz, 1H), 3.93 (s, 1H), 3.43 (dd,  $J = 14.3, 9.6$  Hz, 1H), 3.30 (s, 5H), 2.71 – 2.53 (m, 2H), 2.45 (dd,  $J = 18.2, 4.2$  Hz, 1H), 2.31 (qd,  $J = 7.3, 2.0$  Hz, 2H), 0.96 (t,  $J = 7.3$  Hz, 3H).  **$^{13}\text{C NMR}$**  (100 MHz,  $\text{CDCl}_3$ , ppm)  $\delta$  208.0, 177.5, 169.5, 140.0, 131.1, 130.1, 129.9, 129.2, 128.5, 123.4, 117.9, 115.9, 115.5, 112.5, 98.9, 64.0, 44.5, 43.2, 43.0, 40.8, 39.0, 36.1, 7.7. **HPLC**: Chiralpak IA (250 mm); detected at 280 nm; *n*-hexane/*i*-propanol = 90/10, flow = 1.0 mL/min; Retention time: 17.692 min (major), 26.627 min (minor). **HRMS (ESI)**: calcd for  $\text{C}_{25}\text{H}_{24}\text{N}_3\text{O}_4\text{S}$   $[\text{M}+\text{H}]^+$  462.1482, found 462.1480.

**N-((2*R*,2'*S*,5'*S*,*E*)-3',3'-dicyano-5'-(3-methyl-2-oxobutyl)-2'-phenyl-3*H*-spiro[benzofuran-2,1'-cyclopentan]-3-ylidene)methanesulfonamide (3ab)**

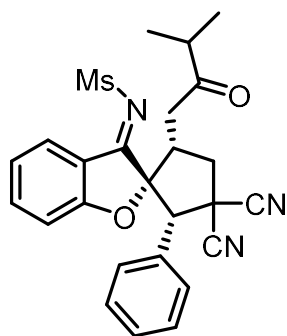

White solid, 44.3 mg. 94% yield.  $R_f = 0.3$  (petroleum ether/ethyl acetate = 4:1), 17:1 dr.  $M_p = 74.6\text{--}77.9^\circ\text{C}$ ,  $[\alpha]_D^{25} = +46.86$  ( $c = 0.318$ ,  $\text{CHCl}_3$ ). 85% ee.  **$^1\text{H NMR}$**  (400 MHz,  $\text{CDCl}_3$ , ppm)  $\delta$  8.26 (d,  $J = 8.2$  Hz, 1H), 7.62 (ddd,  $J = 8.5, 7.1, 1.4$  Hz, 1H), 7.52 – 7.35 (m, 2H), 7.21 (ddd,  $J = 17.0, 11.1, 8.9$  Hz, 4H), 7.04 (t,  $J = 7.6$  Hz, 1H), 3.94 (s, 1H), 3.38 (dd,  $J = 13.6, 9.7$  Hz, 1H), 3.30 (s, 4H), 2.79 – 2.57 (m, 2H), 2.57 – 2.38 (m, 2H), 1.01 (d,  $J = 7.0$  Hz, 3H), 0.94 (d,  $J = 6.9$  Hz, 3H).  **$^{13}\text{C NMR}$**  (100 MHz,  $\text{CDCl}_3$ , ppm)  $\delta$  211.2, 177.6, 169.4, 139.8, 131.0, 130.0, 129.8, 129.0, 128.5, 123.3, 117.8, 115.7, 115.5, 112.4, 98.6, 64.0, 44.2, 43.1, 42.9, 40.8, 39.0, 38.9, 18.3, 17.9. **HPLC**: Chiralpak IA(250 mm); detected at 280 nm; *n*-hexane/*i*-propanol = 90/10, flow = 1.0 mL/min; Retention time: 17.782 min (major), 22.946 min (minor). **HRMS (ESI)**: calcd for  $\text{C}_{26}\text{H}_{26}\text{N}_3\text{O}_4\text{S}$   $[\text{M}+\text{H}]^+$  476.1639, found 476.1645.

**N-((2*R*,2'*S*,5'*S*,*E*)-3',3'-dicyano-5'-(3,3-dimethyl-2-oxobutyl)-2'-phenyl-3*H*-spiro [benzofuran-2,1'-cyclopentan]-3-ylidene)methanesulfonamide (3ac)**

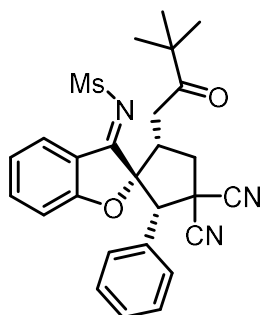

White solid, 41.1 mg. 84% yield.  $R_f = 0.3$  (petroleum ether/ ethyl acetate = 4:1), 20:1 dr.  $M_p = 75.8\text{--}76.9^\circ\text{C}$ ,  $[\alpha]_D^{25} = +50.00$  ( $c = 0.240$ ,  $\text{CHCl}_3$ ). 81% ee.  **$^1\text{H NMR}$**  (400 MHz,  $\text{CDCl}_3$ , ppm)  $\delta$  8.25 (d,  $J = 8.2$  Hz, 1H), 7.61 (t,  $J = 7.8$  Hz, 1H), 7.48 – 7.35 (m, 2H), 7.25 – 7.12 (m, 4H), 7.02 (t,  $J = 7.7$  Hz, 1H), 3.94 (s, 1H), 3.32 (d,  $J = 16.2$  Hz, 5H), 2.81 – 2.52 (m, 3H), 1.00 (s, 9H).  **$^{13}\text{C NMR}$**  (100 MHz,  $\text{CDCl}_3$ , ppm)  $\delta$  212.7, 177.8, 169.4, 139.8, 131.0, 130.1, 129.8, 129.1, 128.5, 123.3, 117.9, 115.8, 115.6, 112.4, 98.7, 64.3, 44.3, 44.2, 43.3, 42.9, 38.9, 35.7, 26.3. **HPLC**: Chiralpak IA(250 mm); detected at 280 nm; *n*-hexane/*i*-propanol = 90/10, flow = 1.0 mL/min; Retention time: 42.570 min (major), 60.110 min (minor). **HRMS (ESI)**: calcd for  $\text{C}_{27}\text{H}_{28}\text{N}_3\text{O}_4\text{S}$   $[\text{M}+\text{H}]^+$  490.1795, found 490.1791.

**N-((2*R*,2'*S*,5'*S*,*E*)-3',3'-dicyano-5'-(2-cyclopentyl-2-oxoethyl)-2'-phenyl-3*H*-spiro [benzofuran-2,1'-cyclopentan]-3-ylidene)methanesulfonamide (3ad)**

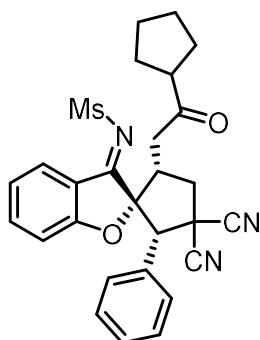

White solid, 42.7 mg. 90% yield.  $R_f = 0.3$  (petroleum ether/ ethyl acetate = 4:1), 11:1 dr.  $M_p = 80.2\text{--}82.4^\circ\text{C}$ ,  $[\alpha]_D^{25} = +22.40$  ( $c = 0.250$ ,  $\text{CHCl}_3$ ). 93% ee.  **$^1\text{H NMR}$**  (400 MHz,  $\text{CDCl}_3$ , ppm)  $\delta$  8.27 (d,  $J = 8.2$  Hz, 1H), 7.67 – 7.60 (m, 1H), 7.46 – 7.38 (m, 2H), 7.26 – 7.15 (m, 4H), 7.05 (t,  $J = 7.7$  Hz, 1H), 3.94 (s, 1H), 3.40 (dd,  $J = 13.8, 9.7$  Hz, 1H), 3.31 (s, 3H), 2.77 – 2.59 (m, 3H), 2.52 (dd,  $J = 18.2, 4.6$  Hz, 1H), 1.80 – 1.48 (m, 9H).  **$^{13}\text{C NMR}$**  (100 MHz,  $\text{CDCl}_3$ , ppm)  $\delta$  209.9, 177.7, 169.5, 139.9, 131.1, 130.1, 129.9, 129.1, 128.6, 123.4, 118.0, 115.8, 115.6, 112.5, 98.8, 64.1, 51.3, 44.4, 43.3, 43.0, 40.5, 39.0, 29.4, 28.7, 26.0, 25.9. **HPLC**: Chiralpak IA (250 mm); detected at 280 nm; *n*-hexane/*i*-propanol = 80/20, flow = 1.0 mL/min; Retention time: 18.902 min (major), 38.139 min (minor). **HRMS (ESI)**: calcd for  $\text{C}_{28}\text{H}_{28}\text{N}_3\text{O}_4\text{S}$   $[\text{M}+\text{H}]^+$  502.1795, found 502.1791.

**N-((2*R*,2'*S*,5'*S*,*E*)-3',3'-dicyano-5'-(2-cyclohexyl-2-oxoethyl)-2'-phenyl-3*H*-spiro[benzofuran-2,1'-cyclopentan]-3-ylidene)methanesulfonamide (3ae)**

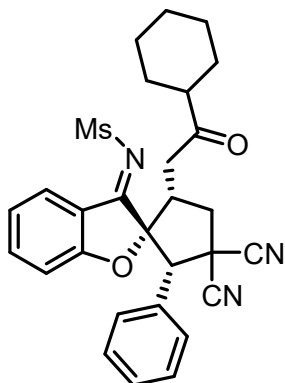

White solid, 48.5 mg. 95% yield.  $R_f = 0.3$  (petroleum ether/ethyl acetate = 4:1), 15:1 dr.  $M_p = 69.7\text{--}71.6^\circ\text{C}$ ,  $[\alpha]_D^{25} = +18.08$  ( $c = 0.284$ ,  $\text{CHCl}_3$ ). 81% ee.  $^1\text{H NMR}$  (400 MHz,  $\text{CDCl}_3$ , ppm)  $\delta$  8.26 (d,  $J = 8.2$  Hz, 1H), 7.63 (td,  $J = 7.7, 1.4$  Hz, 1H), 7.49 – 7.37 (m, 2H), 7.25 – 7.14 (m, 4H), 7.05 (t,  $J = 7.7$  Hz, 1H), 3.93 (s, 1H), 3.46 – 3.33 (m, 1H), 3.30 (s, 3H), 2.70 – 2.55 (m, 2H), 2.50 (dd,  $J = 18.3, 4.6$  Hz, 1H), 2.19 (td,  $J = 9.7, 4.3$  Hz, 1H), 1.80 – 1.61 (m, 5H), 1.19 (dd,  $J = 19.6,$

9.7 Hz, 6H).  $^{13}\text{C NMR}$  (100 MHz,  $\text{CDCl}_3$ , ppm)  $\delta$  210.6, 177.6, 169.4, 139.8, 131.0, 130.0, 129.7, 129.0, 128.5, 123.3, 117.9, 115.7, 115.5, 112.4, 98.7, 64.1, 50.6, 44.2, 43.2, 42.9, 39.2, 38.9, 28.5, 28.1, 25.6, 25.5, 25.3. **HPLC:** Chiralpak IE(250 mm); detected at 210 nm; *n*-hexane/*i*-propanol = 90/10, flow = 1.0 mL/min; Retention time: 49.318 min (major), 57.447 min (minor). **HRMS (ESI):** calcd for  $\text{C}_{29}\text{H}_{30}\text{N}_3\text{O}_4\text{S}$   $[\text{M}+\text{H}]^+$  516.1952, found 516.1958.

**N-((2*R*,2'*S*,5'*S*,*E*)-5'-(4-((tert-butyldimethylsilyl)oxy)-2-oxobutyl)-3',3'-dicyano-2'-phenyl-3*H*-spiro[benzofuran-2,1'-cyclopentan]-3-ylidene)methanesulfonamide (3af)**

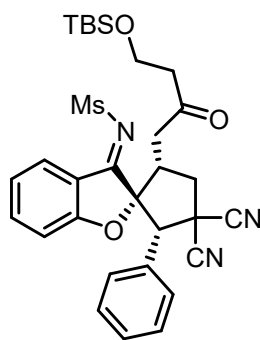

Yellow oil, 55.1 mg. 94% yield.  $R_f = 0.3$  (petroleum ether/ethyl acetate = 4:1), 6:1 dr.  $M_p = 65.1\text{--}67.3^\circ\text{C}$ ,  $[\alpha]_D^{25} = +15.63$  ( $c = 0.610$ ,  $\text{CHCl}_3$ ). 87% ee.  $^1\text{H NMR}$  (400 MHz,  $\text{CDCl}_3$ , ppm)  $\delta$  8.26 (d,  $J = 8.2$  Hz, 1H), 7.65 (ddd,  $J = 8.5, 7.2, 1.4$  Hz, 1H), 7.50 – 7.38 (m, 2H), 7.26 – 7.16 (m, 4H), 7.06 (t,  $J = 7.6$  Hz, 1H), 3.92 (s, 1H), 3.88 – 3.71 (m, 2H), 3.44 (dd,  $J = 14.4, 9.6$  Hz, 1H), 3.29 (s, 4H), 2.85 – 2.35 (m, 5H), 0.86 (s, 9H), 0.02 (s, 6H).  $^{13}\text{C}$

**NMR** (100 MHz,  $\text{CDCl}_3$ , ppm)  $\delta$  207.0, 177.5, 169.5, 140.0, 131.1, 130.1, 129.9, 129.2, 128.6, 123.4, 118.0, 116.0, 115.5, 112.5, 99.0, 64.0, 59.1, 45.8, 44.4, 43.2, 43.0, 42.4, 39.0, 26.0, 18.3, -5.4. **HPLC:** Chiralpak IA(250 mm); detected at 280 nm; *n*-hexane/*i*-propanol = 90/10, flow = 1.0 mL/min; Retention time: 11.138 min (major), 15.956 min (minor). **HRMS (ESI):** calcd for  $\text{C}_{31}\text{H}_{38}\text{N}_3\text{O}_5\text{SSi}$   $[\text{M}+\text{H}]^+$  592.2296, found 592.2299.

**N-((2*R*,2'*S*,5'*S*,*E*)-3',3'-dicyano-5'-(2-oxo-2-phenylethyl)-2'-phenyl-3*H*-spiro[benzofuran-2,1'-cyclopentan]-3-ylidene)methanesulfonamide (3ag)**

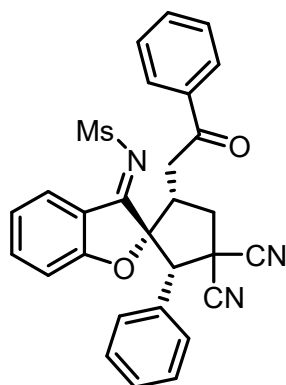

White solid, 48.4 mg. 95% yield.  $R_f = 0.3$  (petroleum ether/ethyl acetate = 4:1), 3:1 dr.  $M_p = 99.6\text{--}100.7^\circ\text{C}$ ,  $[\alpha]_D^{25} = +23.30$  ( $c = 0.236$ ,  $\text{CHCl}_3$ ). 86% ee.  $^1\text{H NMR}$  (400 MHz,  $\text{CDCl}_3$ , ppm)  $\delta$  8.28 (d,  $J = 8.2$  Hz, 1H), 7.85 – 7.72 (m, 2H), 7.68 – 7.59 (m, 1H), 7.59 – 7.51 (m, 1H), 7.51 – 7.33 (m, 5H), 7.30 – 7.15 (m, 5H), 7.05 (t,  $J = 7.7$  Hz, 1H), 3.99 (s, 1H), 3.59 – 3.43 (m, 2H), 3.31 (s, 3H), 3.25 – 3.11 (m, 1H), 3.10 – 3.00 (m, 1H), 2.82 – 2.70 (m, 1H).  $^{13}\text{C NMR}$  (100 MHz,  $\text{CDCl}_3$ , ppm)  $\delta$  196.7, 177.8, 169.6, 140.0, 136.0, 133.9, 131.1, 130.1, 129.9, 129.2, 128.9, 128.5, 128.2, 123.4, 118.0, 115.9, 115.6, 112.5, 99.0, 64.2, 44.9, 43.3, 43.0, 39.1, 37.5. **HPLC**: Chiralpak IA (250 mm); detected at 280 nm; *n*-hexane/*i*-propanol = 80/20, flow = 1.0 mL/min; Retention time: 42.071 min (major), 62.719 min (minor). **HRMS (ESI)**: calcd for  $\text{C}_{29}\text{H}_{24}\text{N}_3\text{O}_4\text{S}$   $[\text{M}+\text{H}]^+$  510.1482, found 510.1490.

**N-((2*R*,2'*S*,5'*S*,*E*)-3',3'-dicyano-5'-(2-(naphthalen-1-yl)-2-oxoethyl)-2'-phenyl-3*H*-spiro[benzofuran-2,1'-cyclopentan]-3-ylidene)methanesulfonamide (3ah)**

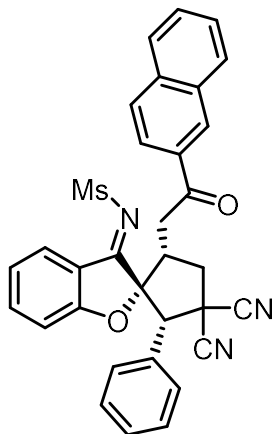

White solid, 52.1 mg. 94% yield.  $R_f = 0.3$  (petroleum ether/ethyl acetate = 4:1), 6:1 dr.  $M_p = 101.5\text{--}103.1^\circ\text{C}$ ,  $[\alpha]_D^{25} = +12.34$  ( $c = 0.154$ ,  $\text{CHCl}_3$ ). 82% ee.  $^1\text{H NMR}$  (400 MHz,  $\text{CDCl}_3$ , ppm)  $\delta$  8.34 – 8.24 (m, 2H), 7.99 – 7.89 (m, 1H), 7.89 – 7.81 (m, 3H), 7.66 – 7.57 (m, 2H), 7.55 (ddd,  $J = 8.2, 6.9, 1.4$  Hz, 1H), 7.51 – 7.41 (m, 2H), 7.32 – 7.26 (m, 1H), 7.26 – 7.17 (m, 3H), 7.05 (h,  $J = 8.7$  Hz, 1H), 4.00 (d,  $J = 4.5$  Hz, 1H), 3.63 – 3.47 (m, 2H), 3.32 (s, 3H), 3.29 – 3.15 (m, 2H), 2.83 (q,  $J = 6.9$  Hz, 1H).  $^{13}\text{C NMR}$  (100 MHz,  $\text{CDCl}_3$ , ppm)  $\delta$  196.7, 177.9, 169.6, 140.0, 135.9, 133.3, 132.5, 131.1, 130.2, 130.1, 129.9, 129.8, 129.2, 129.0, 128.8, 128.5, 127.9, 127.2, 123.6, 123.4, 118.0, 115.9, 115.6, 112.6, 99.0, 64.3, 45.0, 43.3, 43.0, 39.1, 37.6. **HPLC**: Chiralpak IA(250 mm); detected at 280 nm; *n*-hexane/*i*-propanol = 90/10, flow = 1.0 mL/min; Retention time: 27.013 min (major), 36.661 min (minor). **HRMS (ESI)**: calcd for  $\text{C}_{33}\text{H}_{26}\text{N}_3\text{O}_4\text{S}$   $[\text{M}+\text{H}]^+$  560.1639, found 560.1648.

## 7. Experimental Procedure for the Gram-Scale Reaction

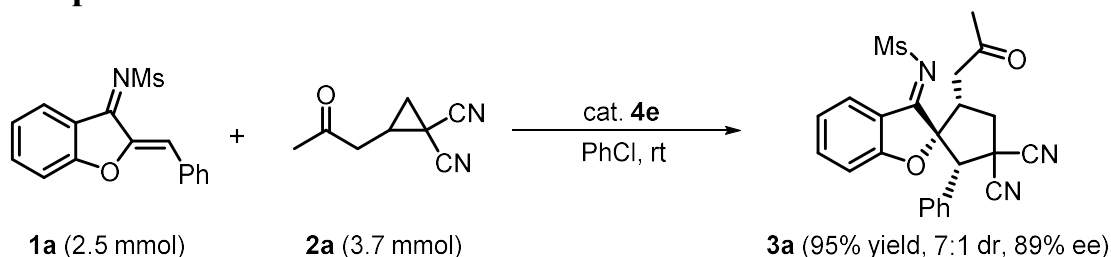

An oven-dried round bottom flask equipped with a magnetic stirring bar was charged with benzofuranone **1a** (2.5 mmol, 1 equiv.), catalyst **4e** (0.5 mmol, 0.2 equiv.), PhCl (30 mL) and then sealed with a septum. The vial was connected to an argon-vacuum line, evacuated and backfilled with argon. After that, a solution of ketone **2** (3.7 mmol, 1.5 equiv.) in PhCl (20 mL) was added. The mixture was allowed to react at room temperature for 24 hours. After confirming full conversion by TLC, the reaction mixture was filtered through a short pad of Celite®. The solvent was then evaporated under vacuum, and the crude reaction mixture was purified using column chromatography on silica gel to obtain the corresponding product **3a** (1.063g).

## 8. Transformations of the Product 3a

(2*R*,2'*S*,5'*S*,*E*)-3'-cyano-3-((methylsulfonyl)imino)-5'-(2-oxopropyl)-2'-phenyl-3H-spiro[benzofuran-2,1'-cyclopentane]-3'-carboxamide (**5**)

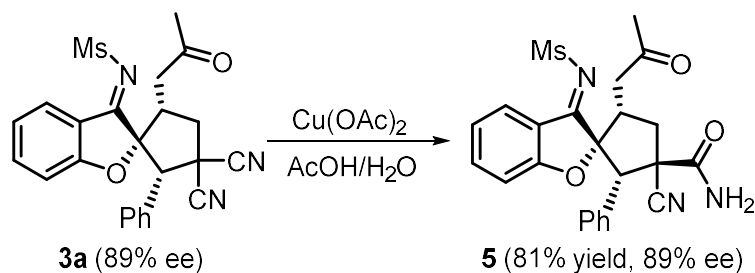

The preparation of **5** was conducted in accordance with previously reported literature procedures.<sup>3a</sup> A glass screw-top vial, equipped with a stirring magnet, was charged with **3a** (0.14 mmol, 1.0 equiv.), Cu(OAc)<sub>2</sub> (0.028 mmol, 0.2 equiv.), H<sub>2</sub>O (0.1 mL) and AcOH (glacial, 2.0 mL). The mixture was allowed to react at 80 °C for 16 h, after which full consumption of **3a** was achieved. The crude mixture was diluted with brine (2 mL) and then extracted with EtOAc (3 × 3 mL). The combined organic phases was sequentially washed with water (2 × 2 mL), brine (1 × 2 mL), then dried over Na<sub>2</sub>SO<sub>4</sub> and finally concentrated under N<sub>2</sub> flow. The crude reaction mixture was



purified using column chromatography on silica gel to obtain the corresponding product **5** (81% yield, 37.7 mg) as a white solid. Mp = 85.3-87.1°C,  $[\alpha]_D^{25} = +10.71$  ( $c = 0.296$ ,  $\text{CHCl}_3$ ). 89% ee.  **$^1\text{H NMR}$**  (400 MHz,  $\text{CDCl}_3$ , ppm)  $\delta$  8.25 (d,  $J = 8.1$  Hz, 1H), 7.63 (ddd,  $J = 8.5, 7.2, 1.4$  Hz, 1H), 7.46 – 7.33 (m, 2H), 7.22 (d,  $J = 8.5$  Hz, 1H), 7.19 – 7.12 (m, 3H), 7.03 (t,  $J = 7.7$  Hz, 1H), 6.08 (s, 1H), 5.49 (s, 1H), 4.15 (s, 1H), 3.29 (s, 5H), 2.62 (dd,  $J = 18.1, 9.3$  Hz, 1H), 2.47 (dd,  $J = 18.0, 4.1$  Hz, 1H), 2.37 (dd,  $J = 13.2, 8.3$  Hz, 1H), 2.05 (s, 3H).  **$^{13}\text{C NMR}$**  (100 MHz,  $\text{CDCl}_3$ , ppm)  $\delta$  205.6, 178.4, 169.6, 168.4, 139.6, 131.0, 130.7, 130.0, 129.3, 128.8, 123.0, 121.5, 118.3, 112.5, 100.8, 62.0, 52.3, 44.8, 43.1, 42.6, 41.7, 30.1. **HPLC**: Chiralpak IA(250 mm); detected at 280 nm;  $n$ -hexane/ $i$ -propanol = 90/10, flow = 1.0 mL/min; Retention time: 23.359 min (major), 28.467 min (minor). **HRMS (ESI)**: calcd for  $\text{C}_{24}\text{H}_{24}\text{N}_3\text{O}_5\text{S}$   $[\text{M}+\text{H}]^+$  466.1431, found 466.1434.

**(2*R*,2'*S*,5'*S*)-3-oxo-5'-(2-oxopropyl)-2'-phenyl-3*H*-spiro[benzofuran-2,1'-cyclopentane]-3',3'-dicarbonitrile (6)**

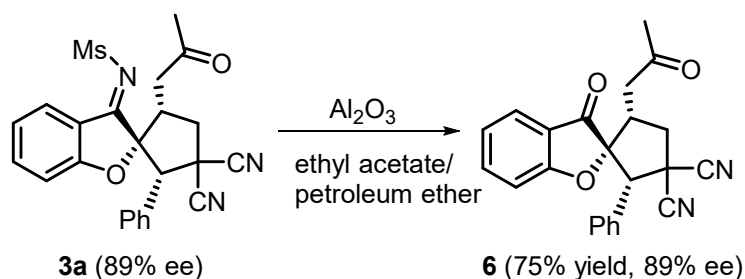

The preparation of **6** was conducted in accordance with previously reported literature protocols.<sup>4</sup> A solution of **3a** (44.75 mg, 0.1 mmol) in ethyl acetate (12 mL) and petroleum ether (12 mL) was added  $\text{Al}_2\text{O}_3$  (550 mg.) The solution was stirred at r.t about 5 hours. After the reaction was completed as monitored by TLC, the solvent was removed under reduced pressure and the residue was purified by flash chromatography on silica gel. White solid, 27.8 mg. 75% yield.  $R_f = 0.3$  (petroleum ether/ ethyl acetate = 3:1). Mp = 75.8-77.1°C,  $[\alpha]_D^{25} = -14.42$  ( $c = 0.104$ ,  $\text{CHCl}_3$ ). 89% ee.  **$^1\text{H NMR}$**  (400 MHz,  $\text{CDCl}_3$ , ppm)  $\delta$  7.63 (ddd,  $J = 8.6, 7.2, 1.5$  Hz, 1H), 7.49 (ddd,  $J = 16.0, 8.0, 1.7$  Hz, 3H), 7.26 – 7.17 (m, 4H), 7.04 (t,  $J = 7.5$  Hz, 1H), 3.93 (s, 1H), 3.41 – 3.27 (m, 2H), 2.70 – 2.56 (m, 3H), 2.02 (s, 3H).  **$^{13}\text{C NMR}$**  (100 MHz,  $\text{CDCl}_3$ , ppm)  $\delta$  205.0, 198.0, 171.3, 139.2, 130.0, 129.9, 129.0, 128.9, 124.8, 123.1, 121.1, 115.7, 115.5, 113.1, 96.3, 61.9, 43.3, 42.8, 41.7, 39.6, 29.9. **HPLC**: Chiralpak IA(250 mm); detected at 280 nm;  $n$ -hexane/ $i$ -propanol = 90/10, flow = 1.0 mL/min; Retention time: 22.700 min

(major), 28.561 min (minor). **HRMS (ESI)**: calcd for C<sub>23</sub>H<sub>19</sub>N<sub>2</sub>O<sub>3</sub> [M+H]<sup>+</sup> 371.1390, found 371.1389.

## 9. References

- [1] a) Z. Gu; J. Zhou; G.-F. Jiang; Y.-G. Zhou, *Org. Chem. Front.* 2018, **5**, 1148; b) J. Qi; H. Tang; C. Chen; S. Cui; G. Xu, *Org. Chem. Front.* 2019, **6**, 2760.
- [2] a) S. Park; T. M. Kadayat; K.-Y. Jun; T. B. Magar; G. Bist; A. Shrestha; E.-S. Lee; Y. Kwon, *Eur. J. Med. Chem.* 2017, **125**, 14; b) A. Stukalov; V. V. Suslonov; M. A. Kuznetsov, *Eur. J. Org. Chem.* 2018, **14**, 1634; c) J. Tian; R. Zhou; H. Sun; H. Song; Z. He, *J. Org. Chem.* 2011, **76**, 2374.
- [3] a) J. Blom, A. Vidal-Albalat, J. Jørgensen, C. L. Barløse, K. S. Jessen, M. V. Iversen and K. A. Jørgensen, Directing the Activation of Donor–Acceptor Cyclopropanes Towards Stereoselective 1,3-Dipolar Cycloaddition Reactions by Brønsted Base catalysis, *Angew. Chem. Int. Ed.* 2017, **56**, 11831; b) D. A. McLeod, M. K. Thøgersen, C. L. Barløse, M. L. Skipper, E. B. Obregón and K. A. Jørgensen, Enantioselective (8+3) Cycloadditions by Activation of Donor– Acceptor Cyclopropanes Employing Chiral Brønsted Base Catalysis, *Angew. Chem. Int. Ed.* 2022, **61**, e202206096.
- [4] S.-Q. Zheng and X.-Y. Lu, *Org. Lett.*, 2008, **20**, 4481-4484.

## 10. NMR spectra of the products

$^1\text{H}$  NMR spectra of a crude mixture

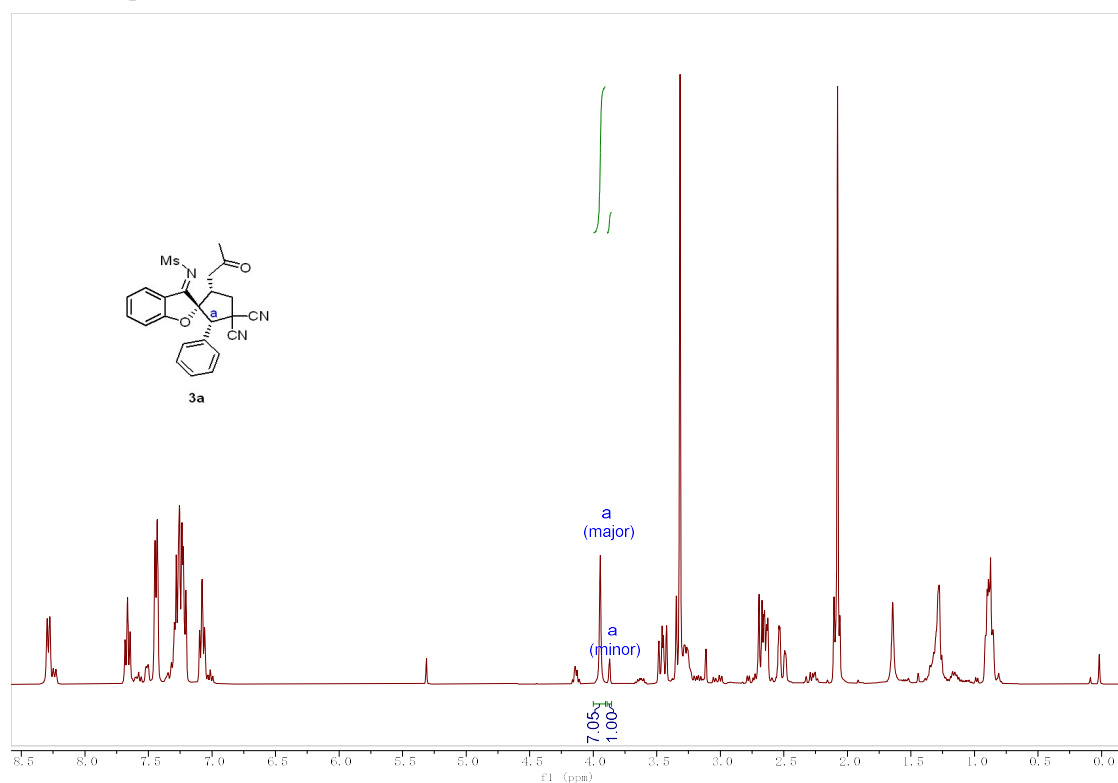

$^1\text{H}$  NMR (400 MHz,  $\text{CDCl}_3$ ) of **3a**

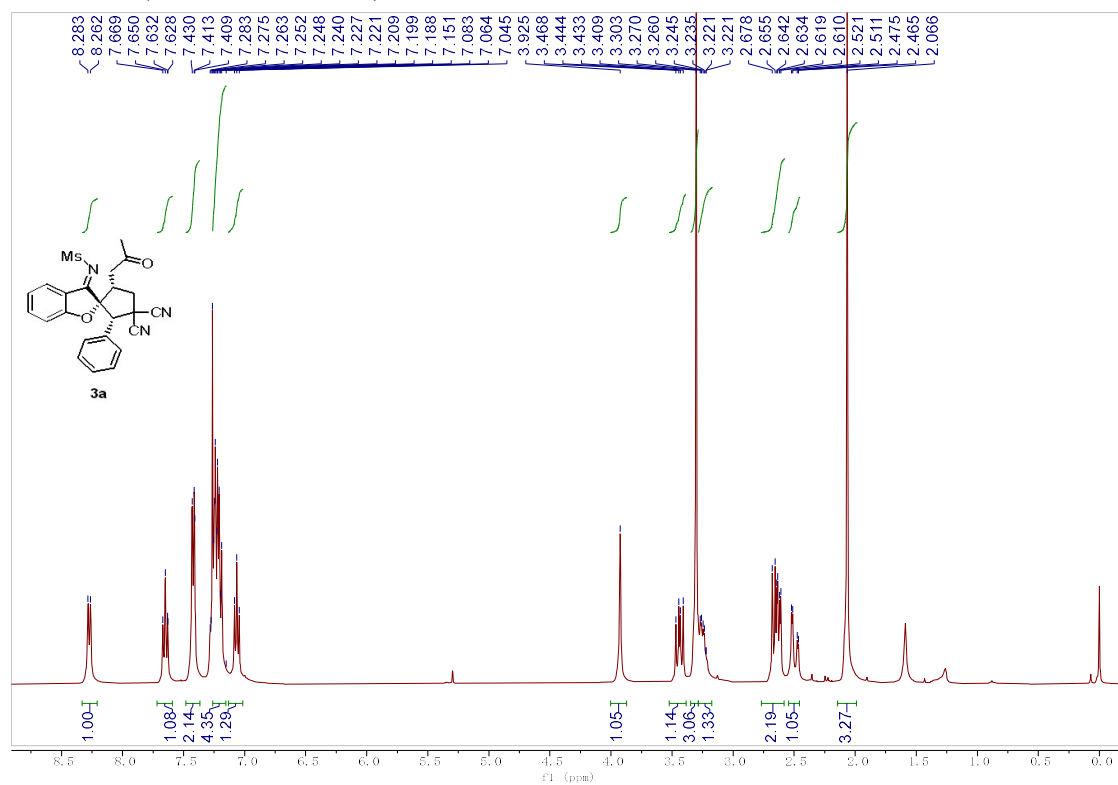

<sup>13</sup>C NMR (100 MHz, CDCl<sub>3</sub>) of **3a**

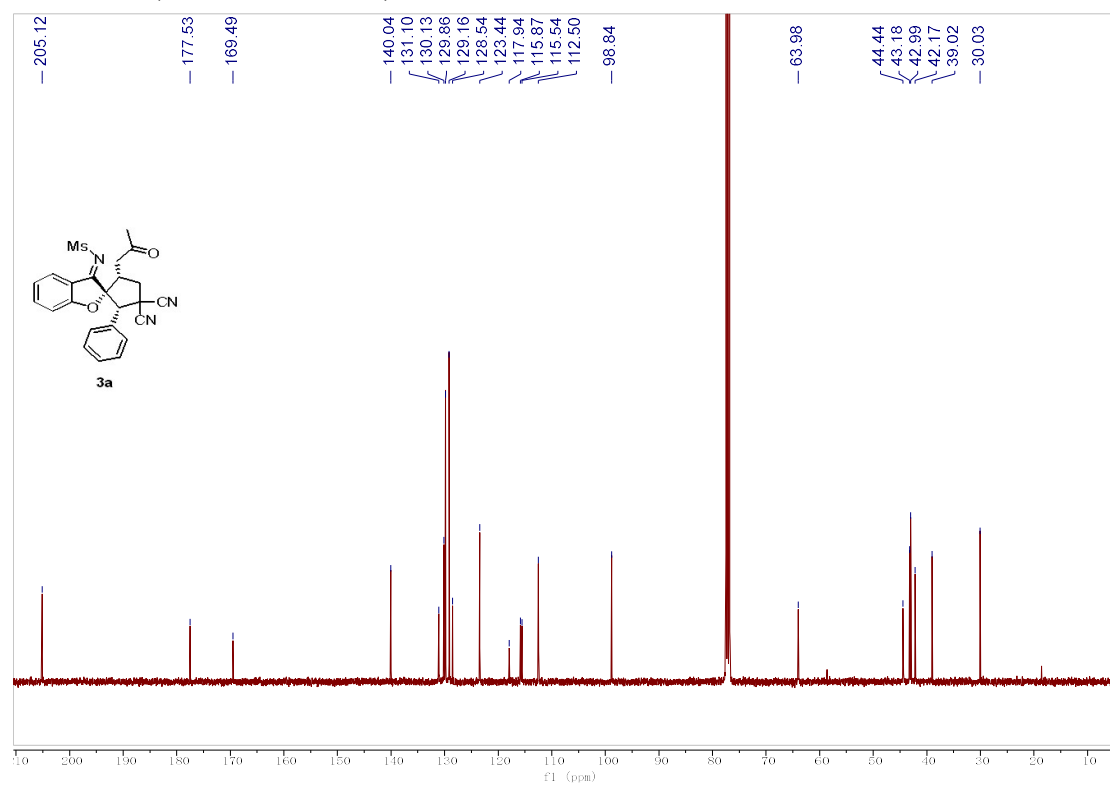

### $^1\text{H}$ NMR (400 MHz, $\text{CDCl}_3$ ) of **3a'**

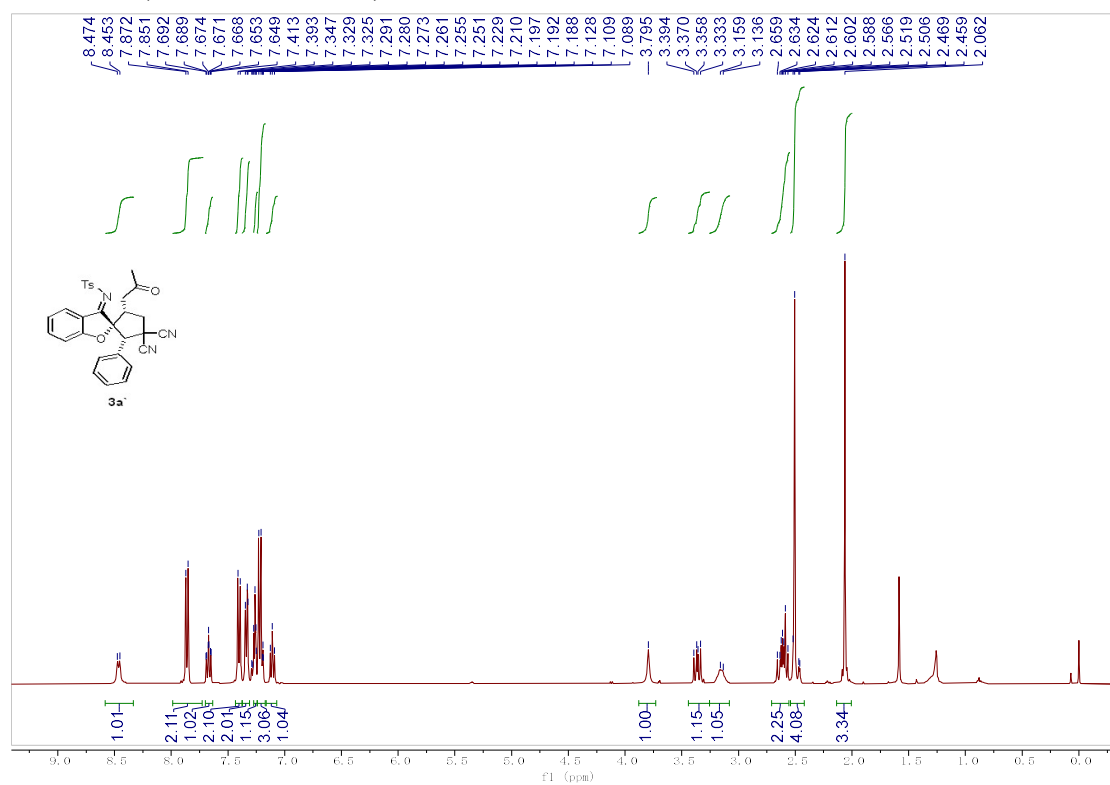

### $^{13}\text{C}$ NMR (100 MHz, $\text{CDCl}_3$ ) of **3a'**

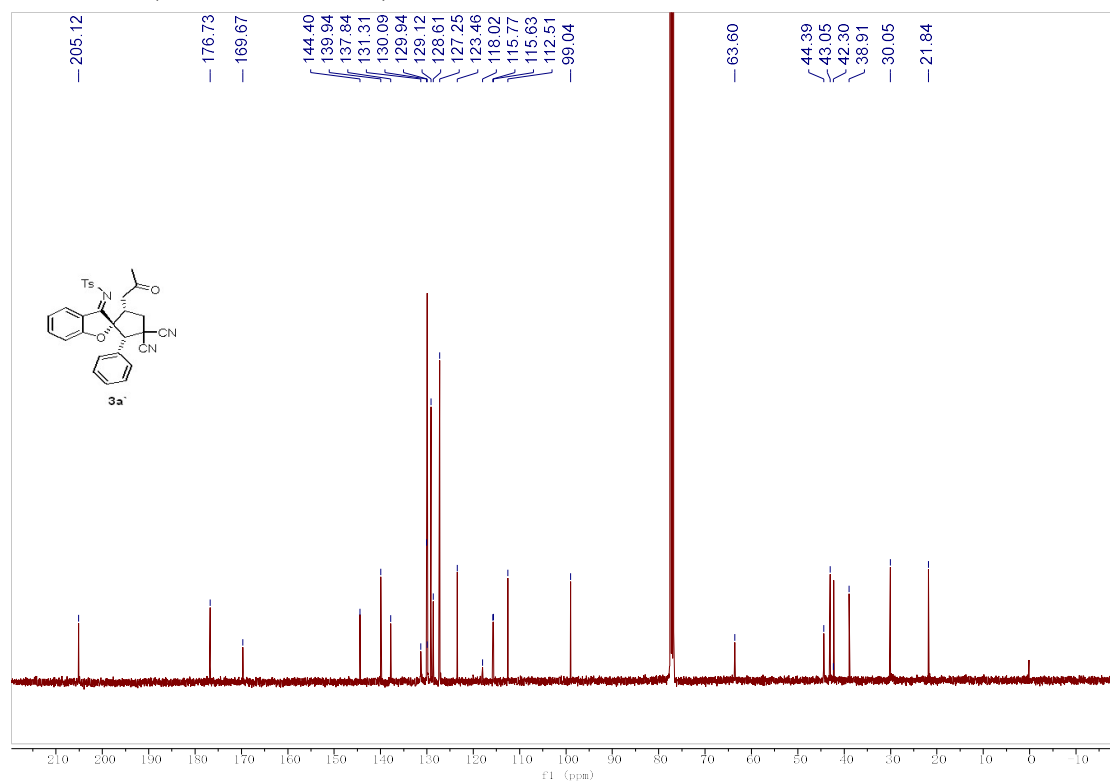

### $^1\text{H}$ NMR (400 MHz, $\text{CDCl}_3$ ) of **3b**

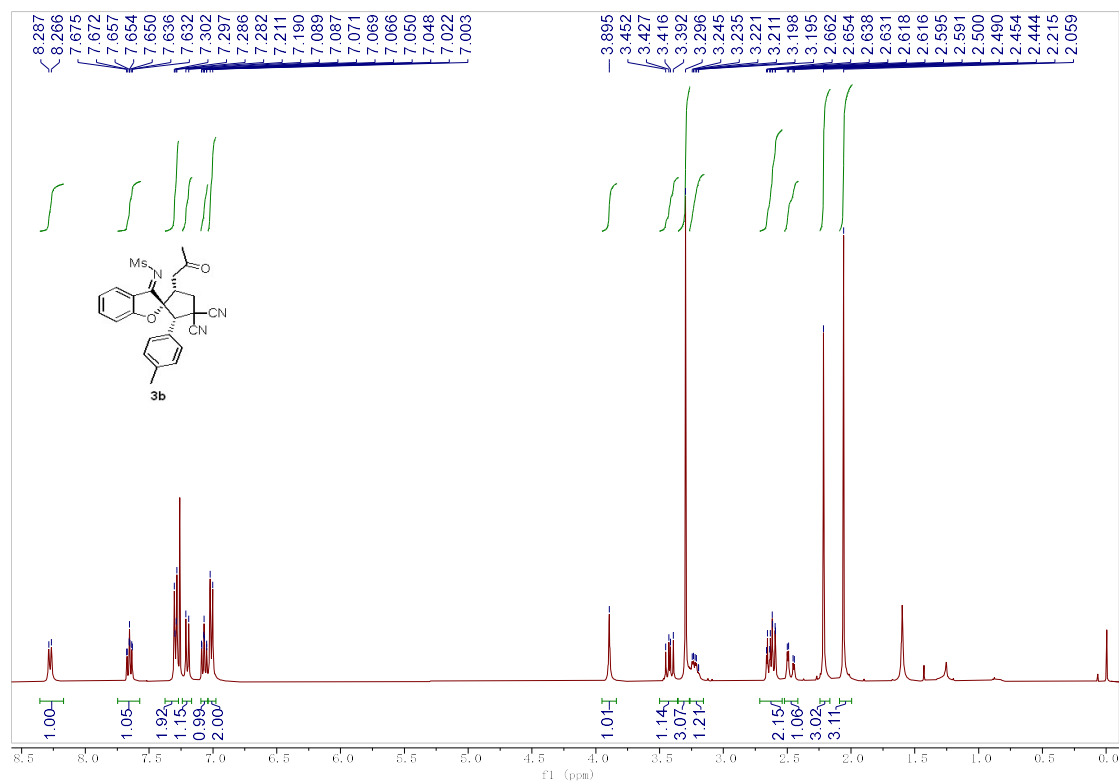

### $^{13}\text{C}$ NMR (100 MHz, $\text{CDCl}_3$ ) of **3b**

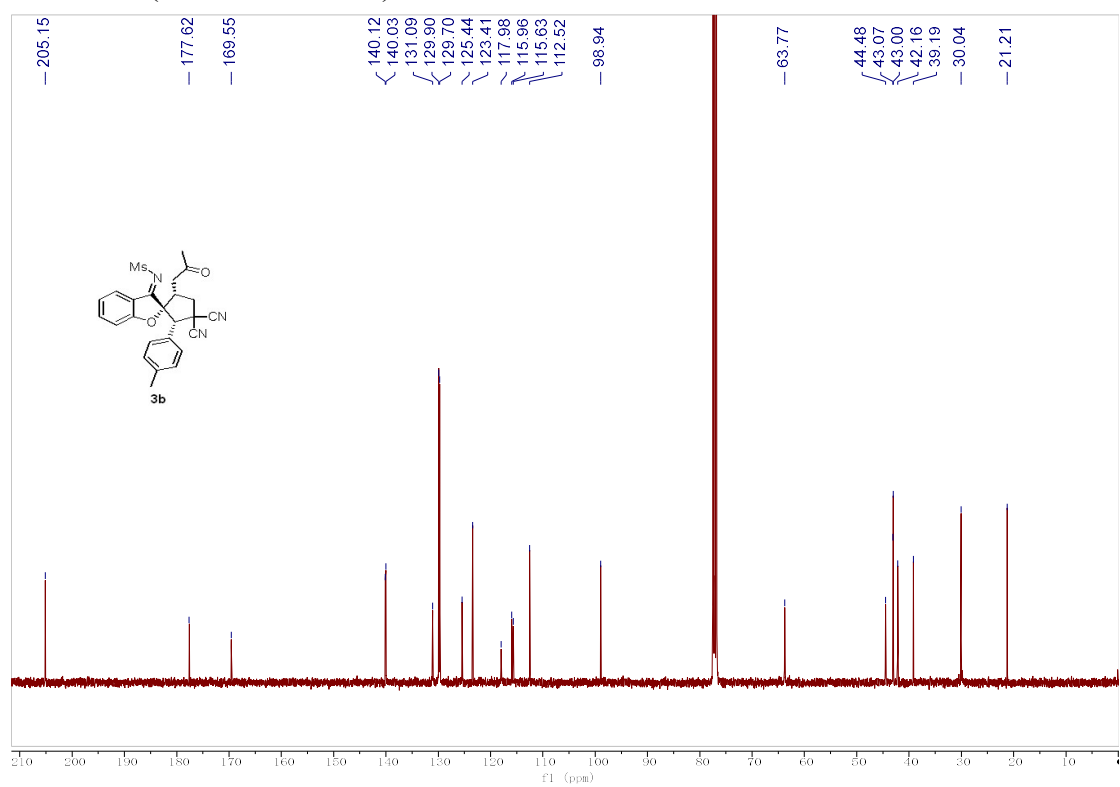

**$^1\text{H}$  NMR (400 MHz,  $\text{CDCl}_3$ ) of **3c****

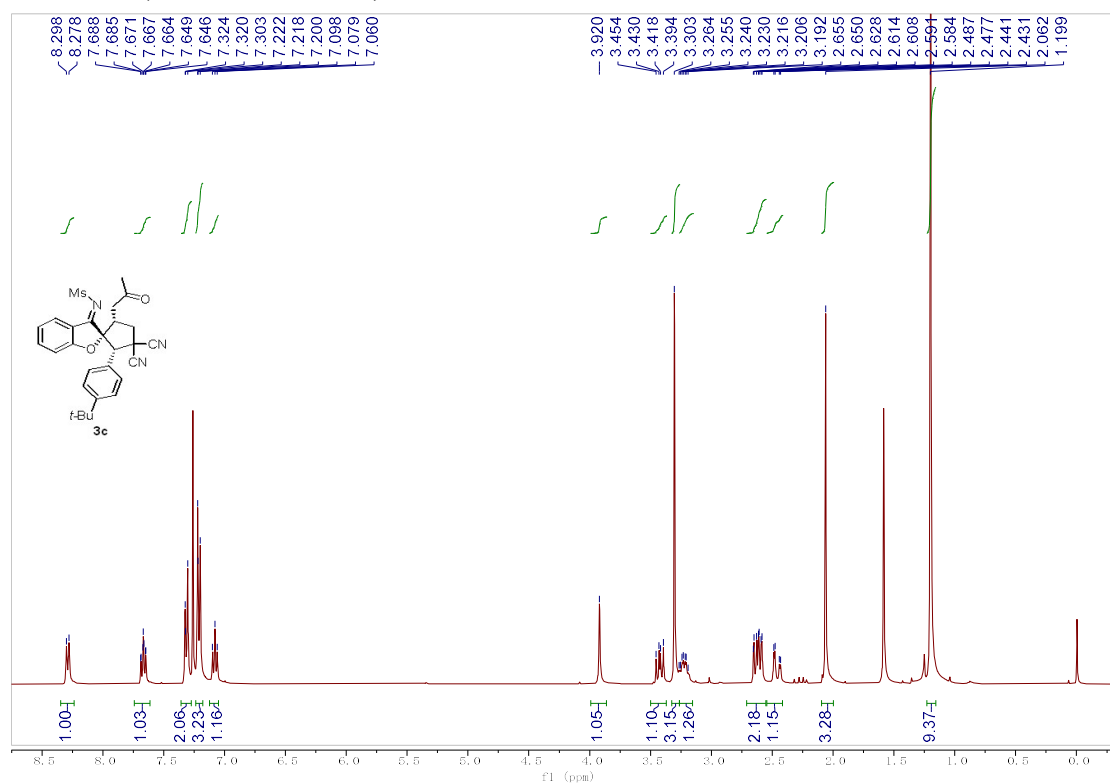

**$^{13}\text{C}$  NMR (100 MHz,  $\text{CDCl}_3$ ) of **3c****

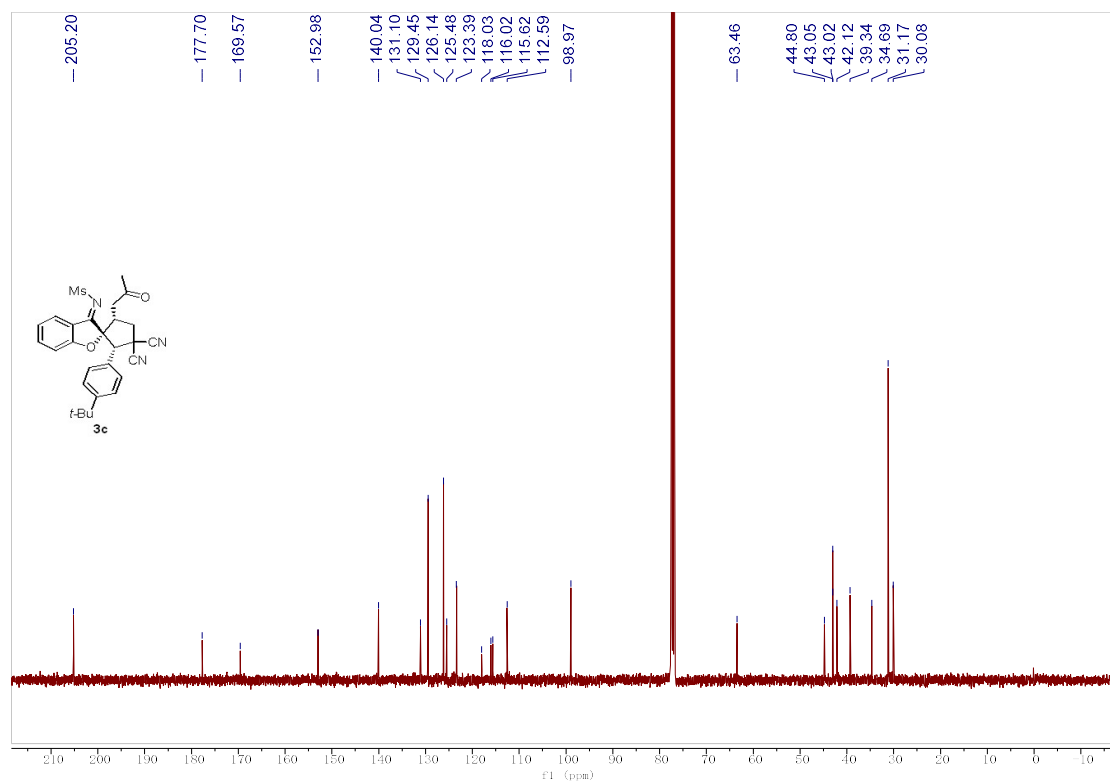





**<sup>1</sup>H NMR (400 MHz, CDCl<sub>3</sub>) of 3e**

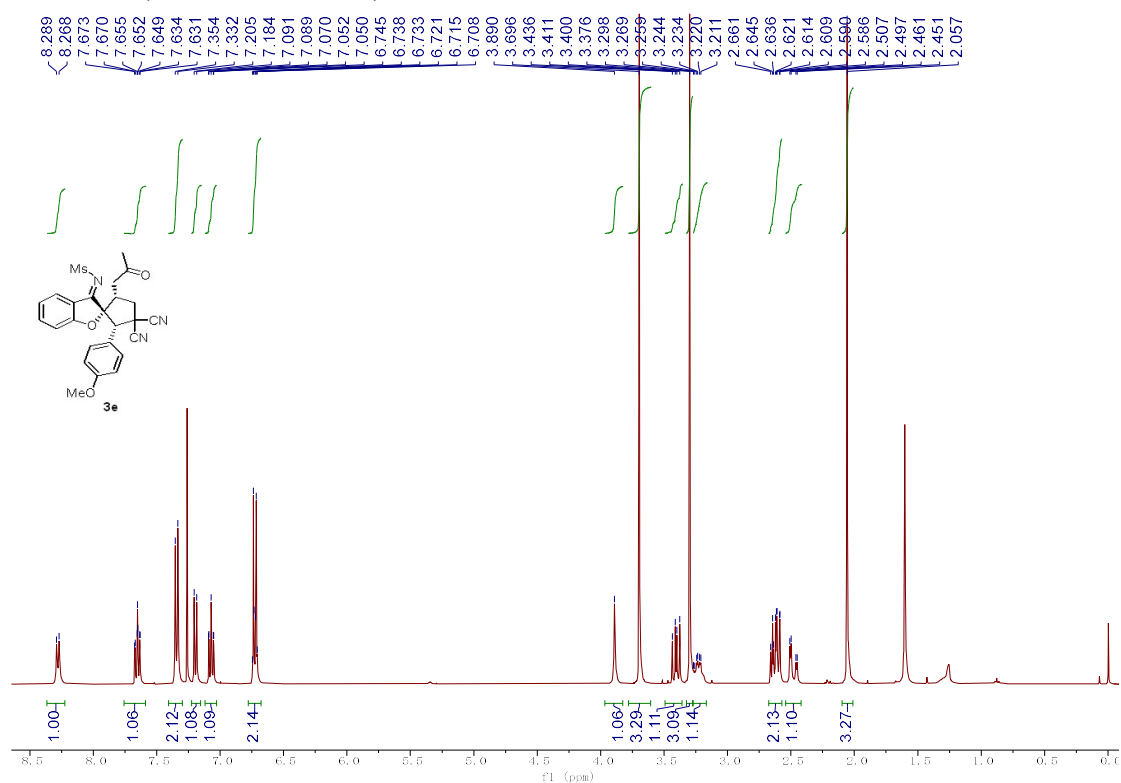

**<sup>13</sup>C NMR (100 MHz, CDCl<sub>3</sub>) of 3e**

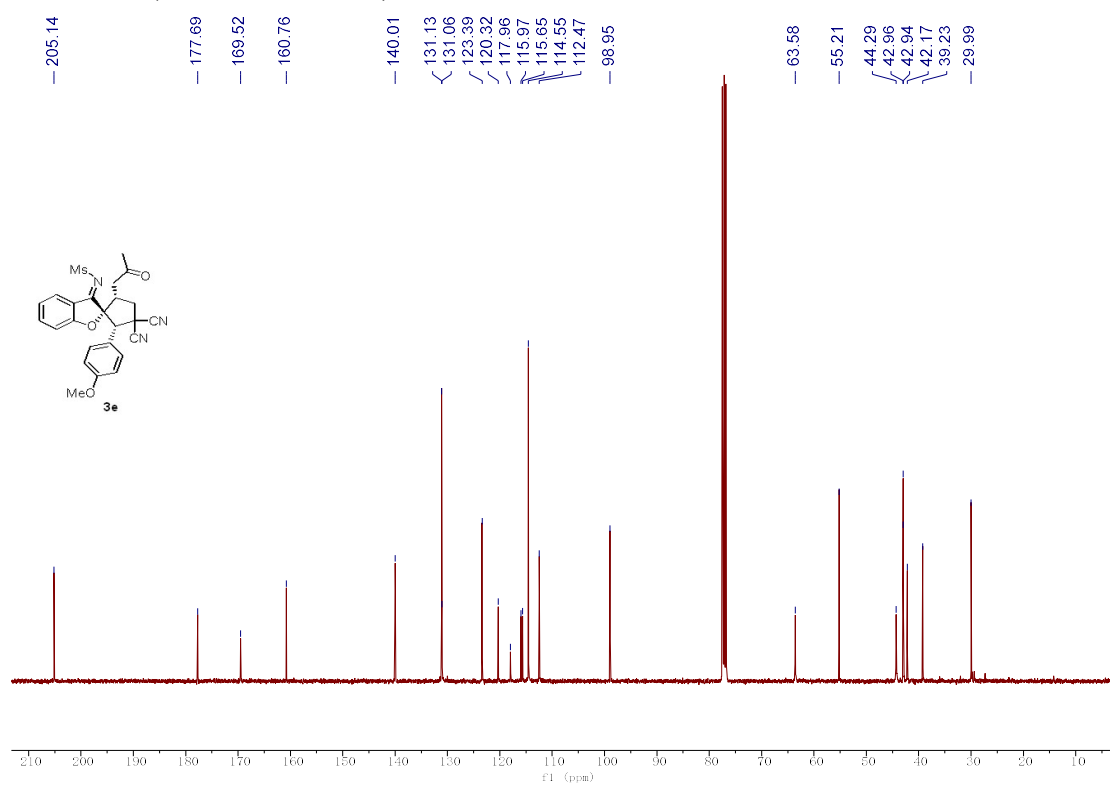

**<sup>1</sup>H NMR (400 MHz, CDCl<sub>3</sub>) of 3f**

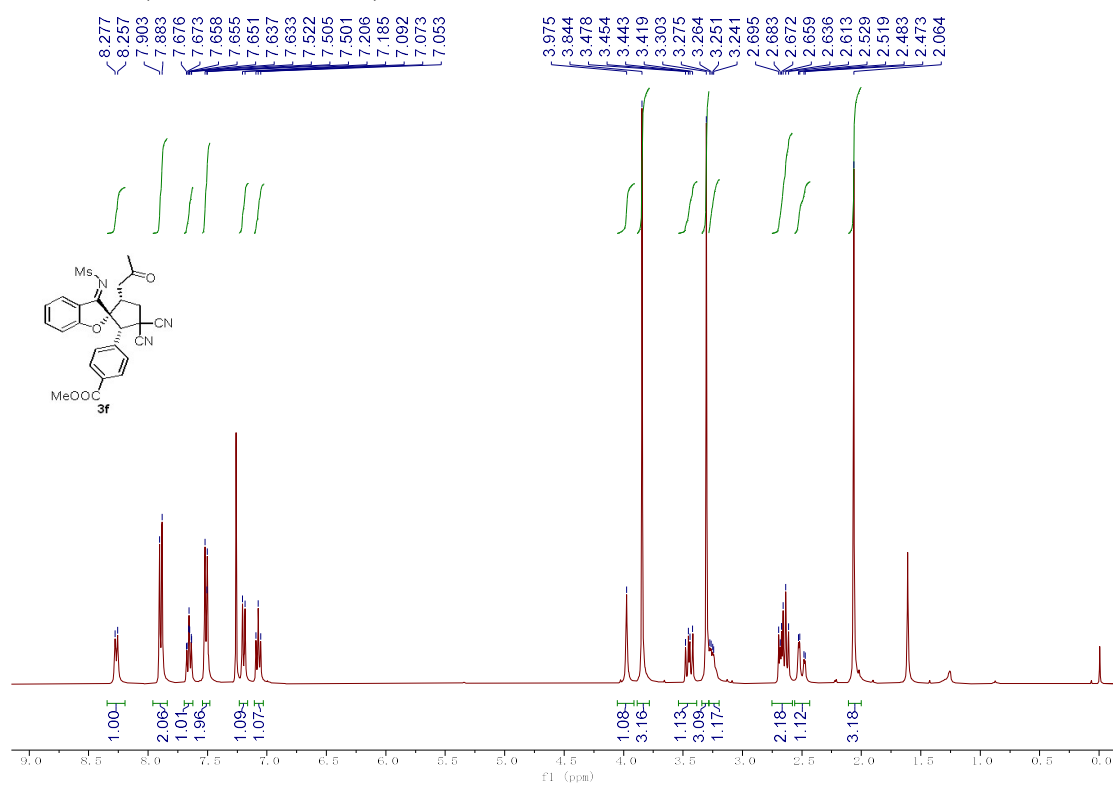

**<sup>13</sup>C NMR (100 MHz, CDCl<sub>3</sub>) of 3f**

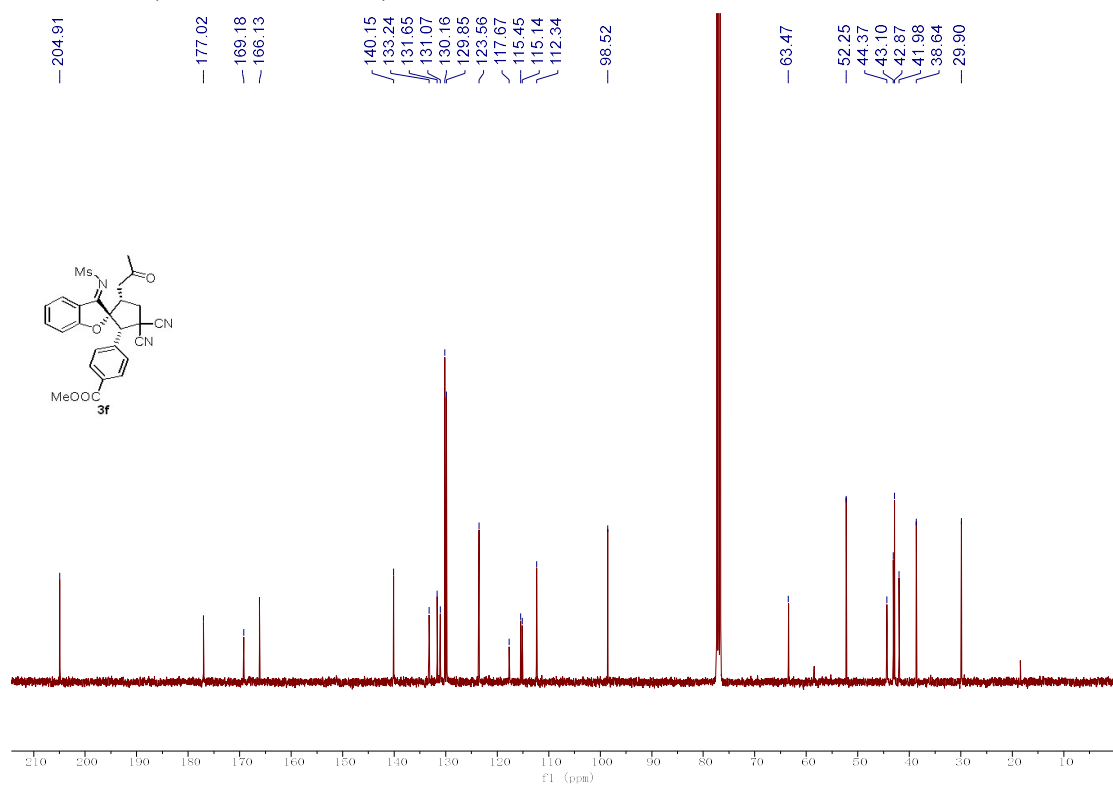

### $^1\text{H}$ NMR (400 MHz, $\text{CDCl}_3$ ) of **3g**

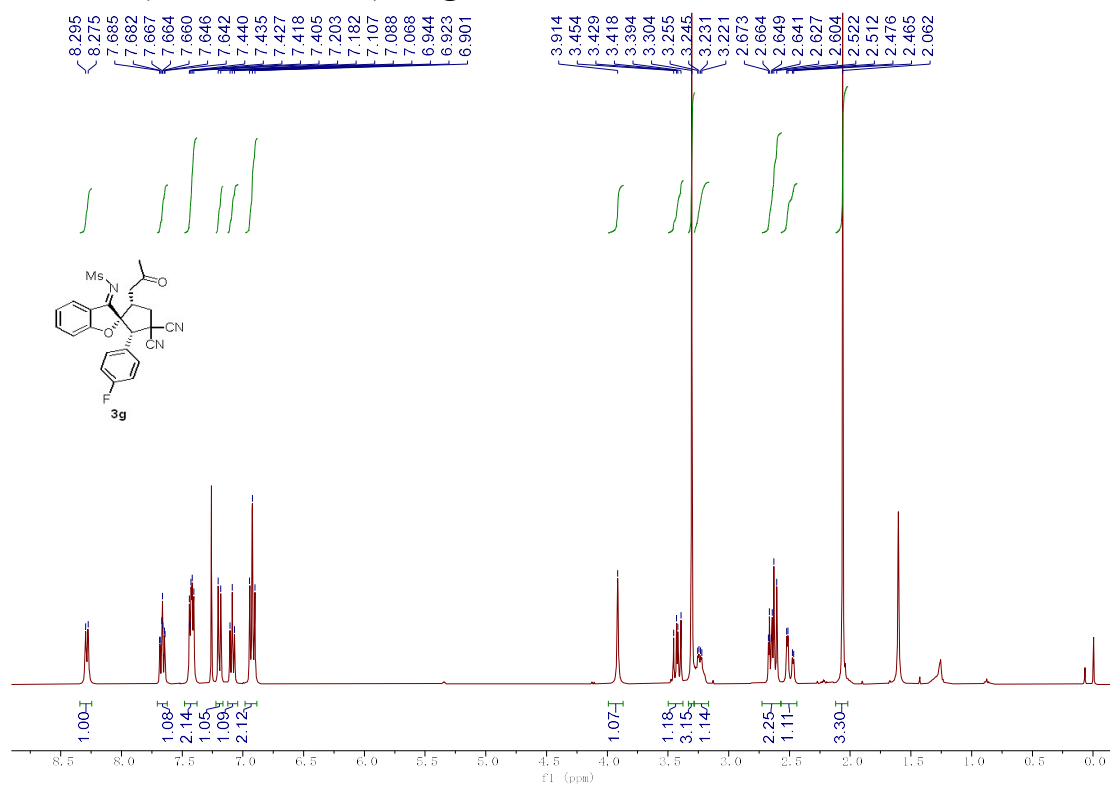

### $^{13}\text{C}$ NMR (100 MHz, $\text{CDCl}_3$ ) of **3g**

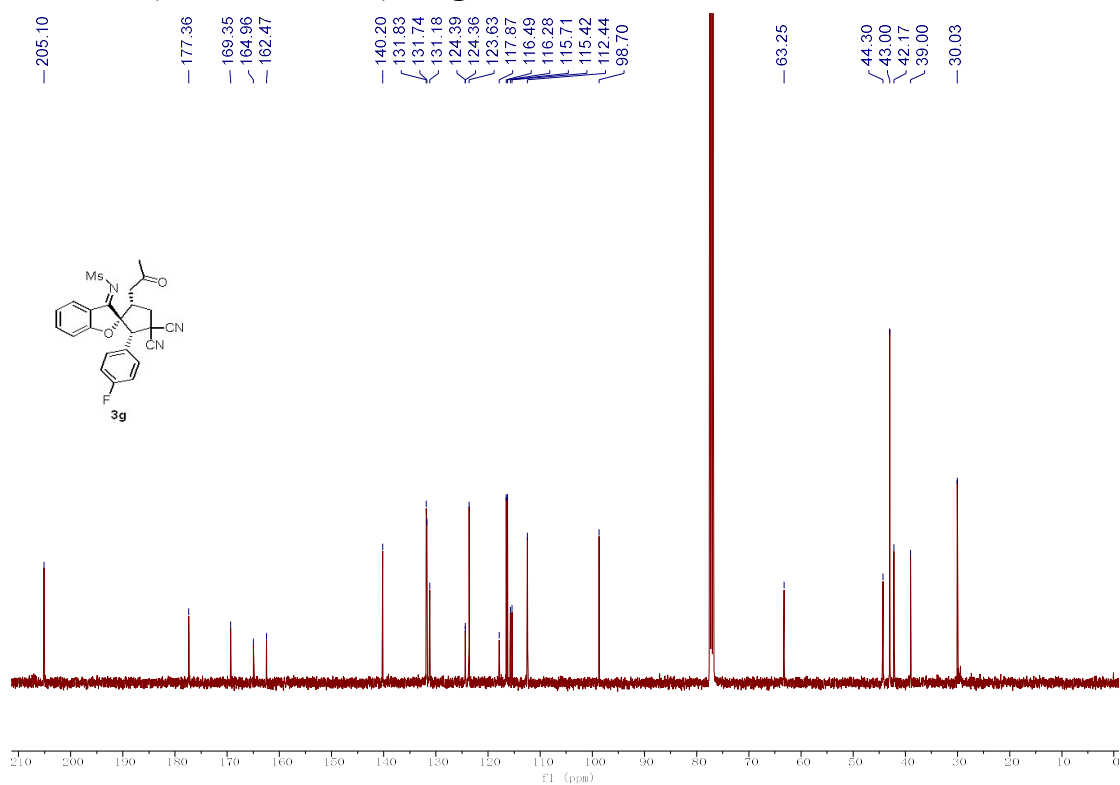

**<sup>19</sup>F NMR (377 MHz, CDCl<sub>3</sub>) of **3g****

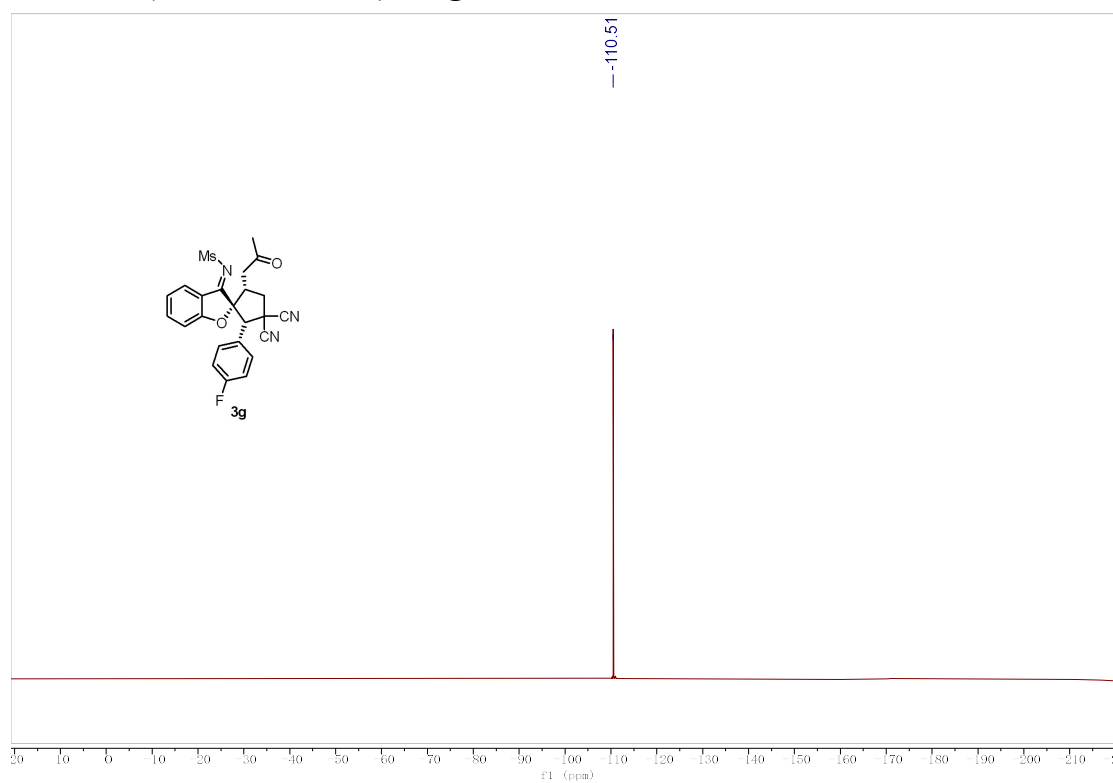

**<sup>1</sup>H NMR (400 MHz, CDCl<sub>3</sub>) of 3h**

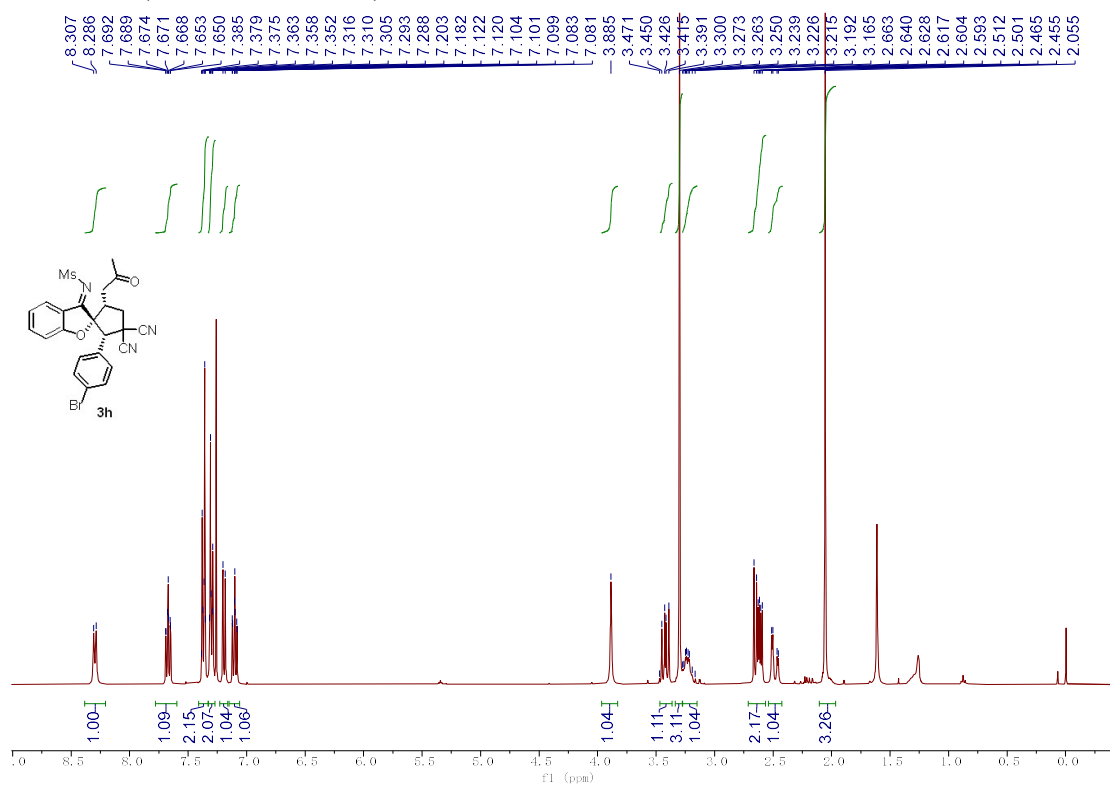

**<sup>13</sup>C NMR (100 MHz, CDCl<sub>3</sub>) of 3h**

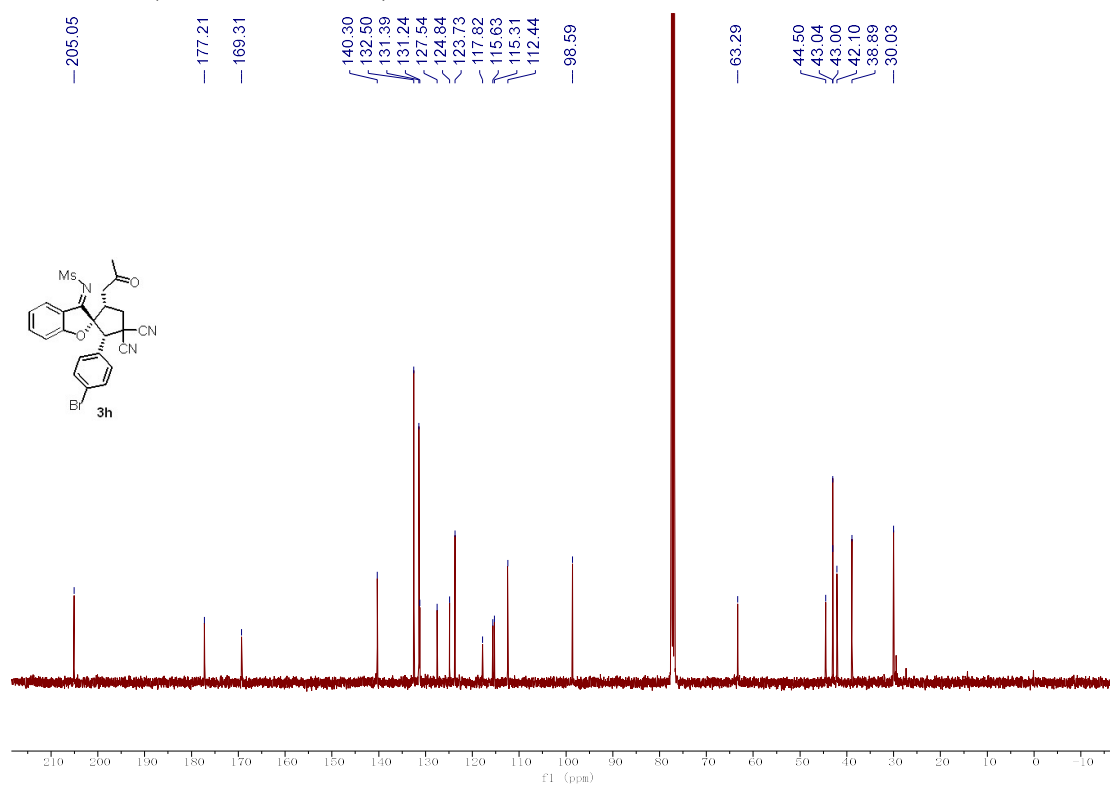

### <sup>1</sup>H NMR (400 MHz, CDCl<sub>3</sub>) of **3i**

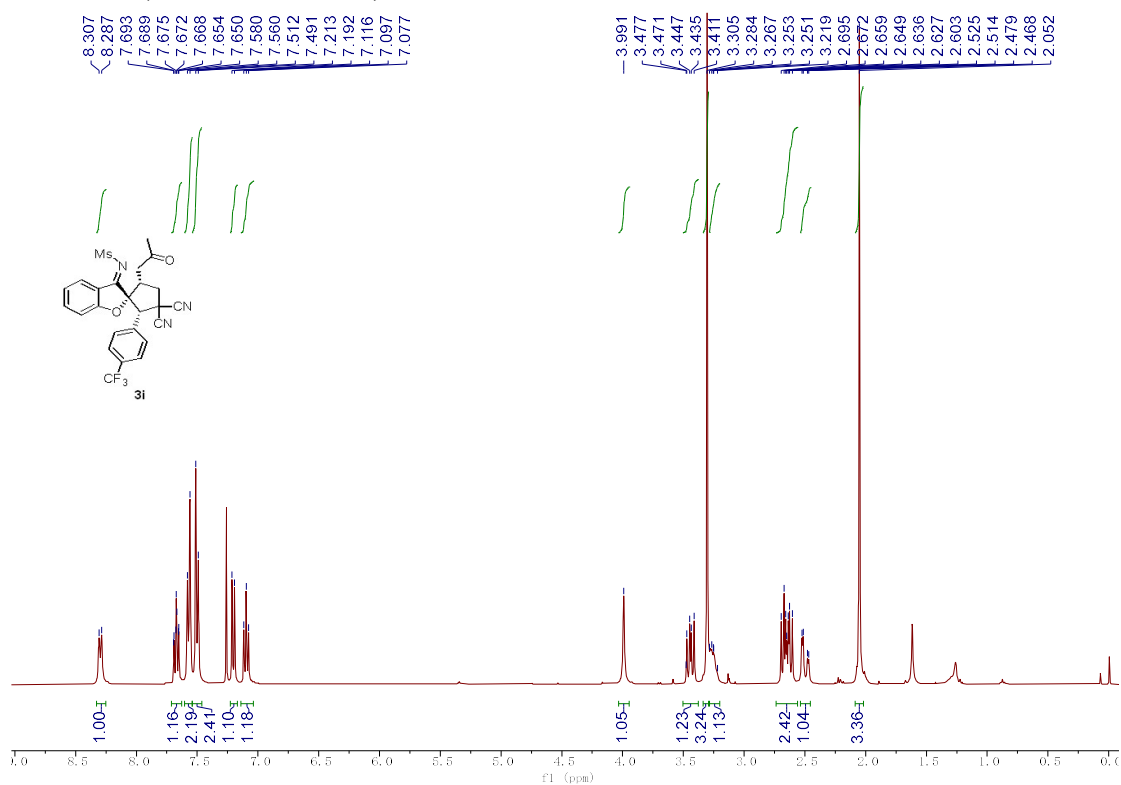

### <sup>13</sup>C NMR (100 MHz, CDCl<sub>3</sub>) of **3i**

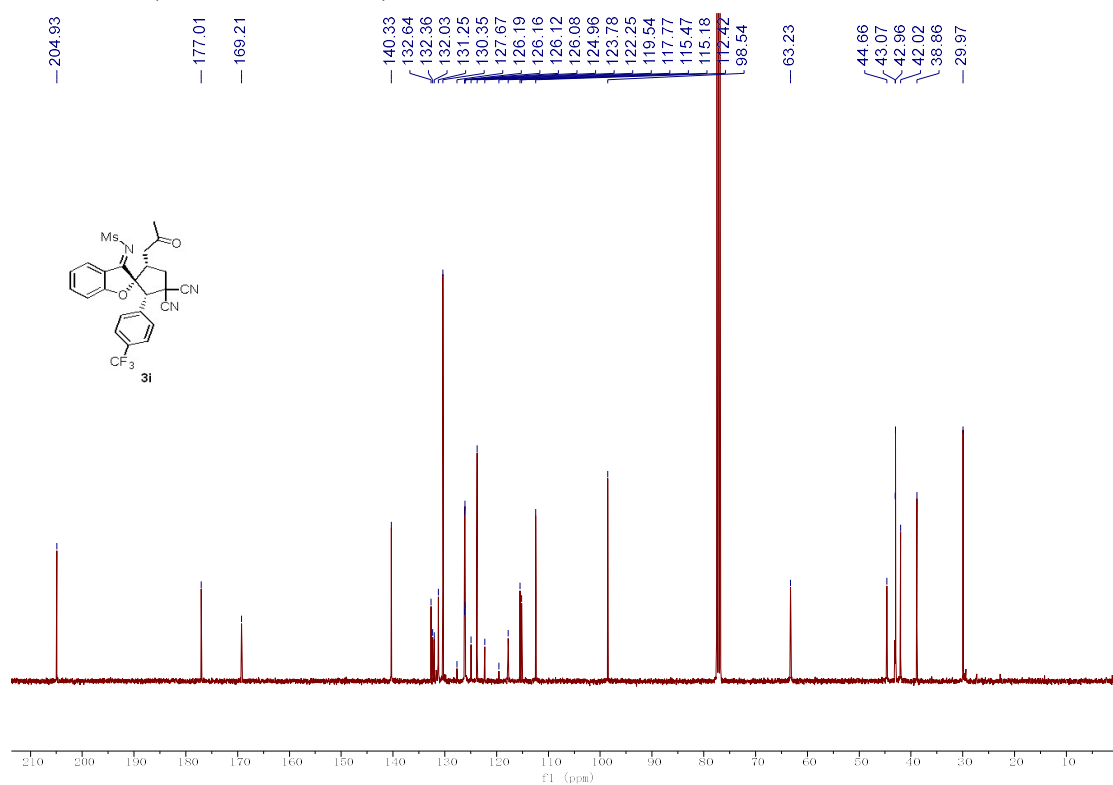

**<sup>19</sup>F NMR (377 MHz, CDCl<sub>3</sub>) of **3i****

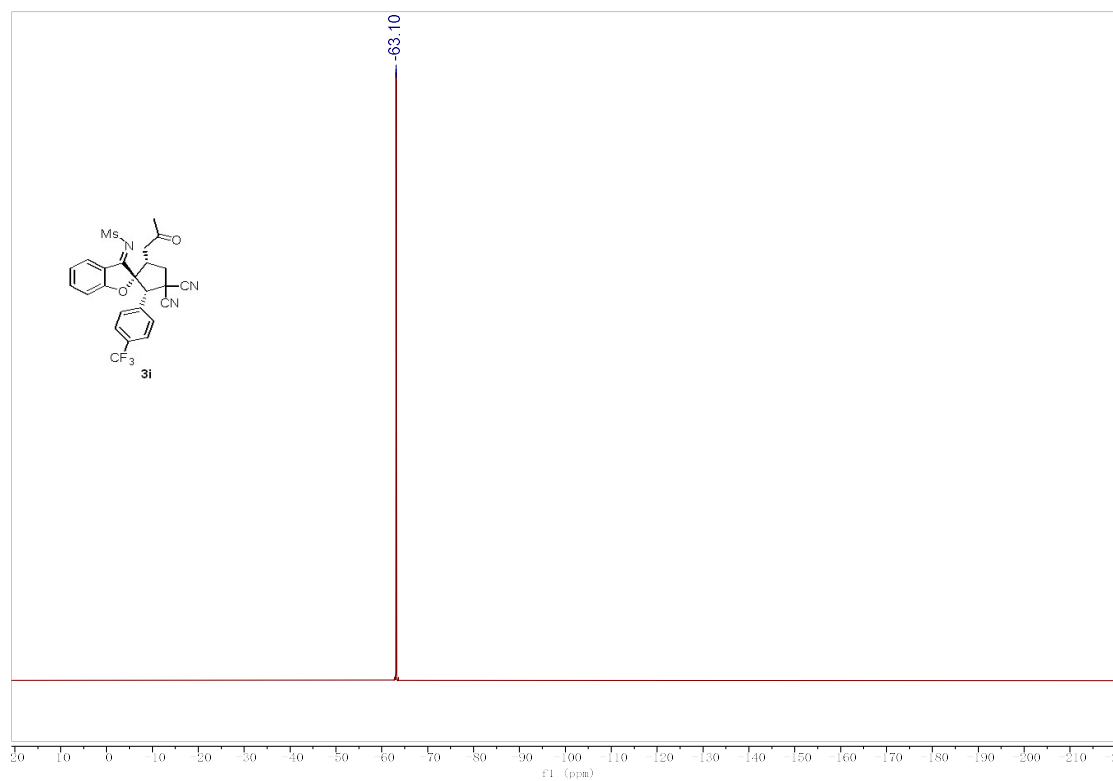

### <sup>1</sup>H NMR (400 MHz, CDCl<sub>3</sub>) of **3j**

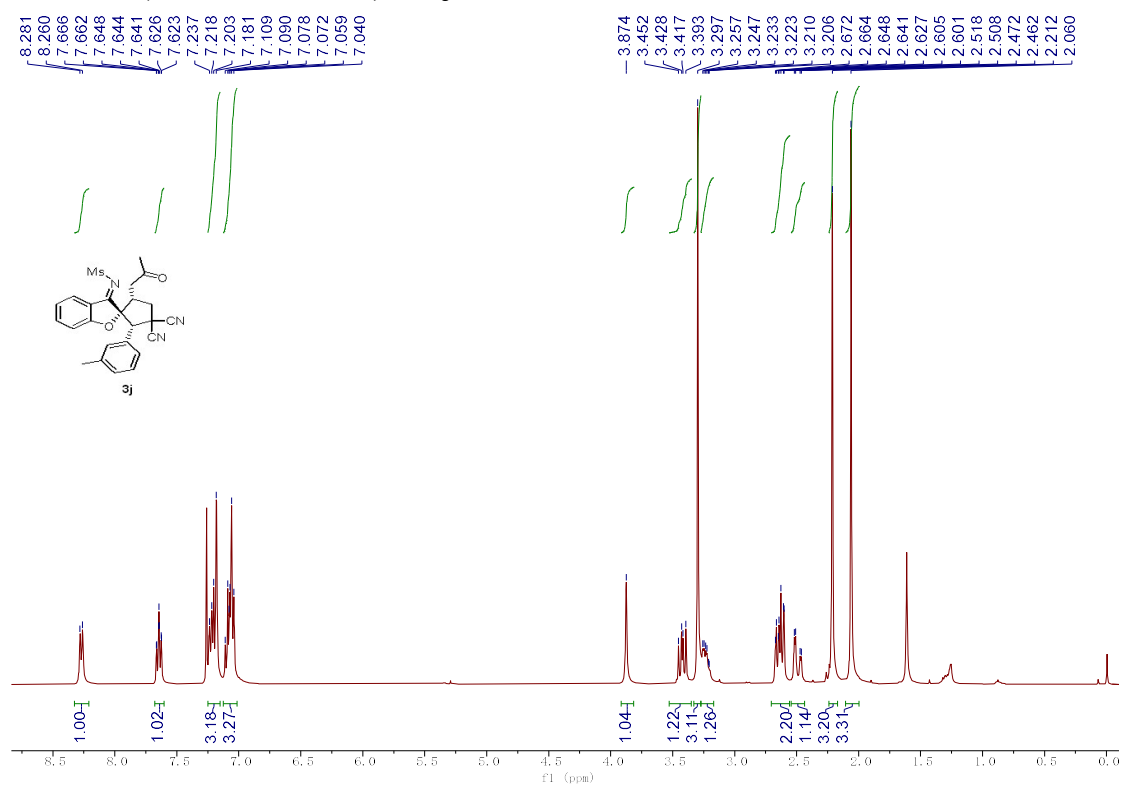

### <sup>13</sup>C NMR (100 MHz, CDCl<sub>3</sub>) of **3j**

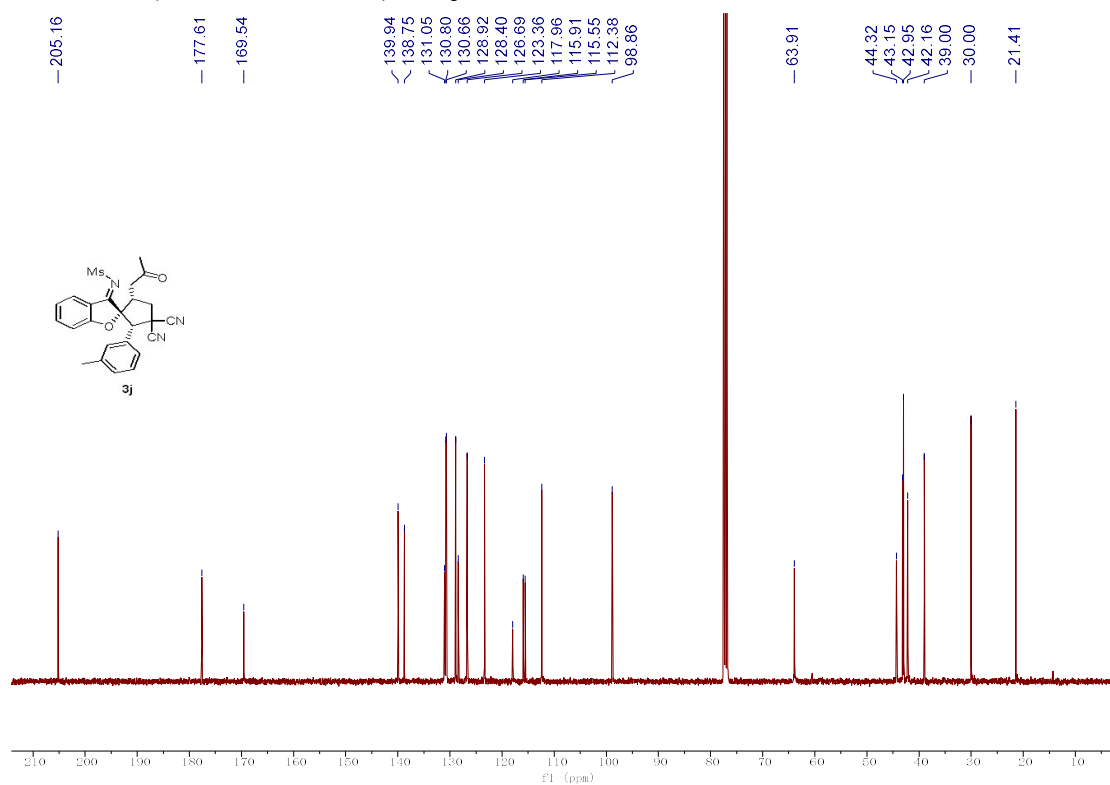



### $^1\text{H}$ NMR (400 MHz, $\text{CDCl}_3$ ) of **3k**

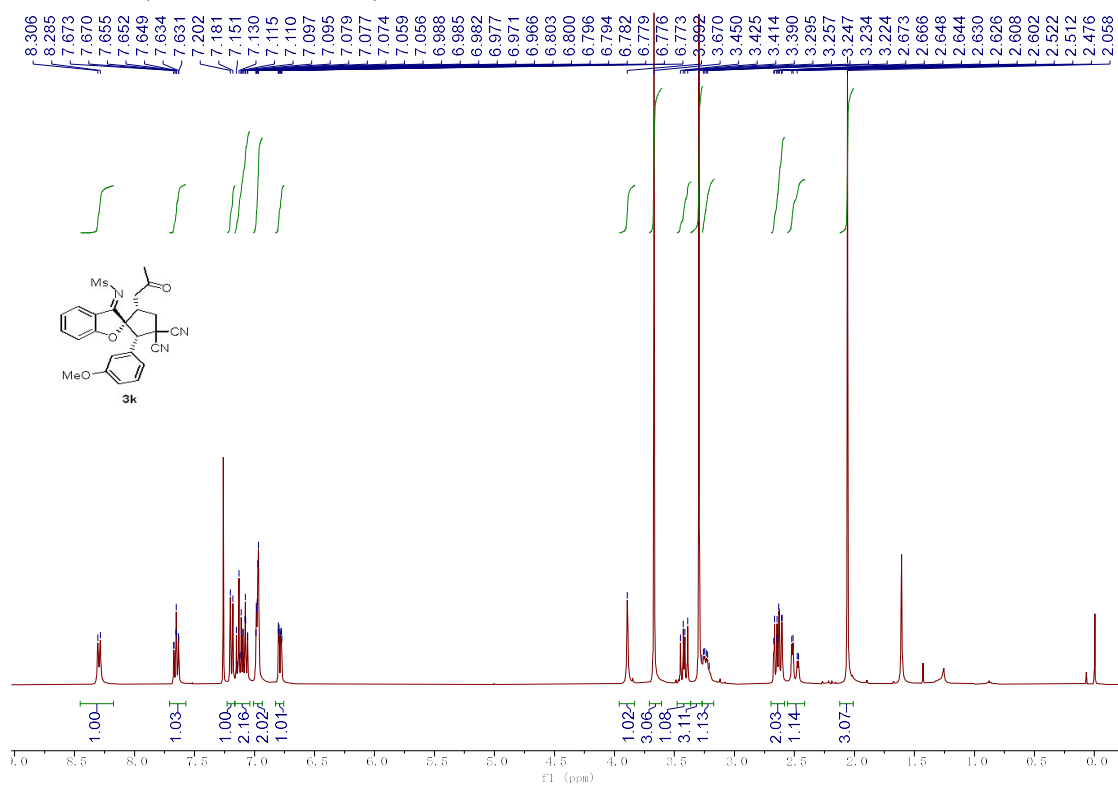

### $^{13}\text{C}$ NMR (100 MHz, $\text{CDCl}_3$ ) of **3k**

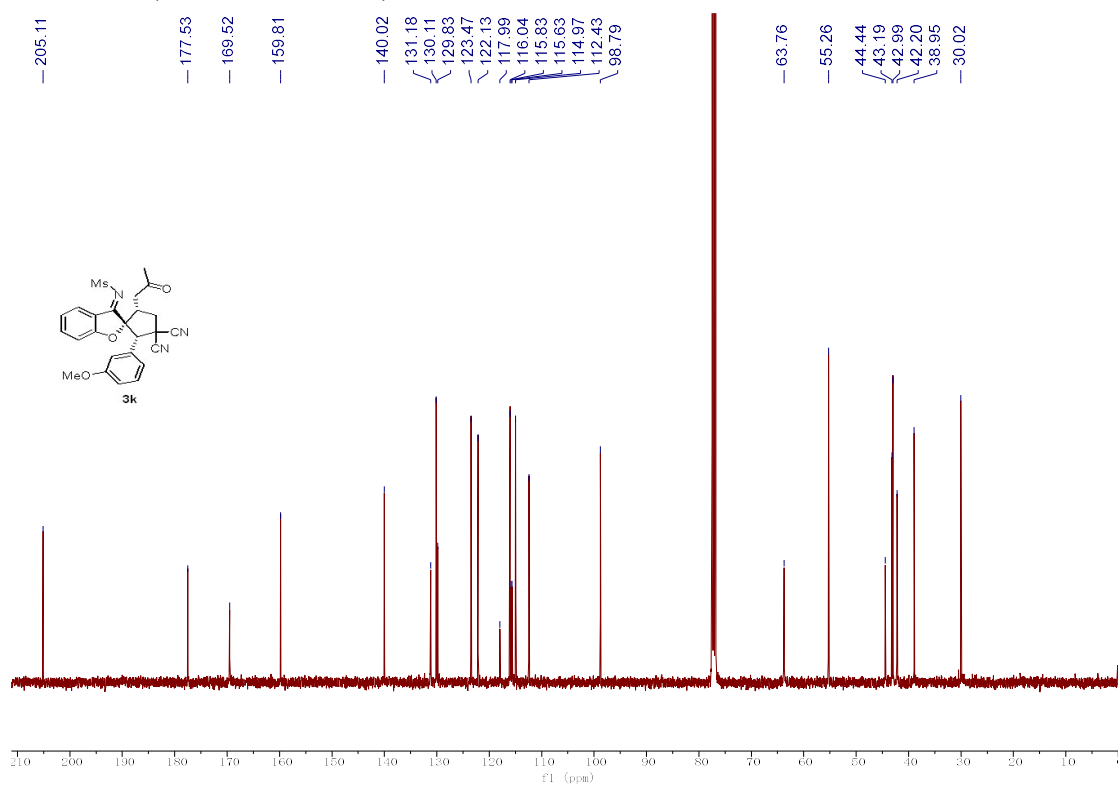

### $^1\text{H}$ NMR (400 MHz, $\text{CDCl}_3$ ) of **31**

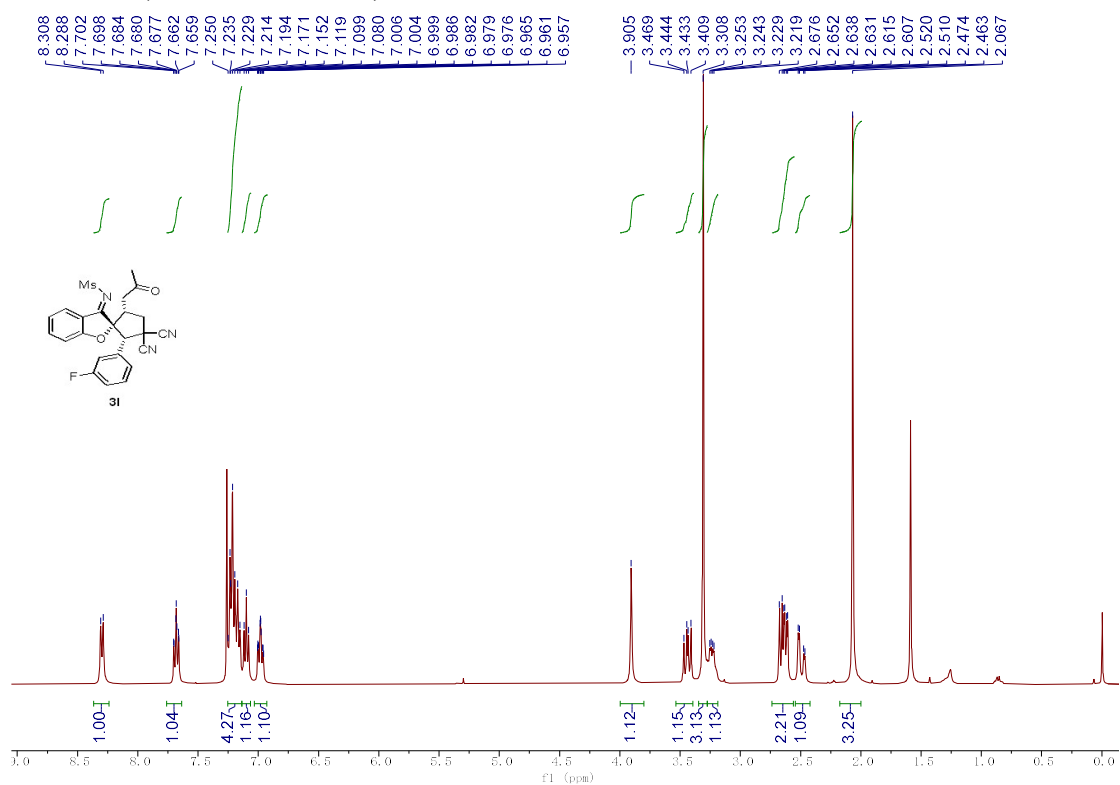

### $^{13}\text{C}$ NMR (100 MHz, $\text{CDCl}_3$ ) of **31**

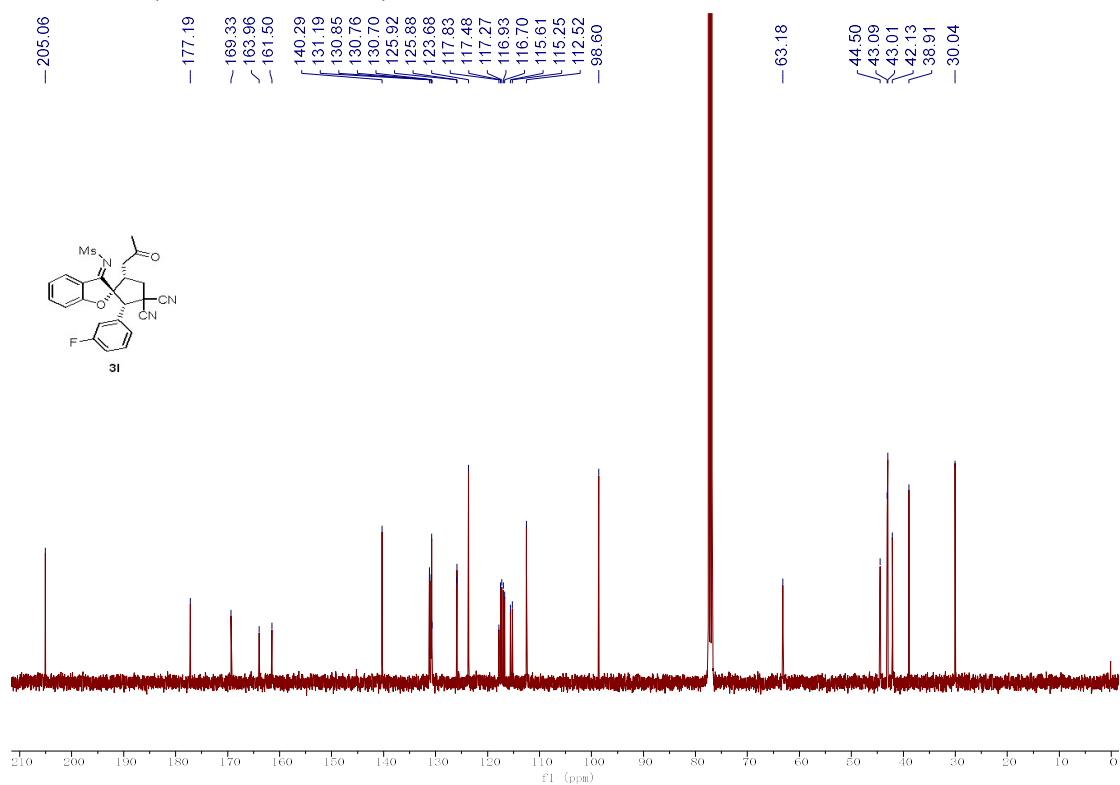

**<sup>19</sup>F NMR (377 MHz, CDCl<sub>3</sub>) of 31**

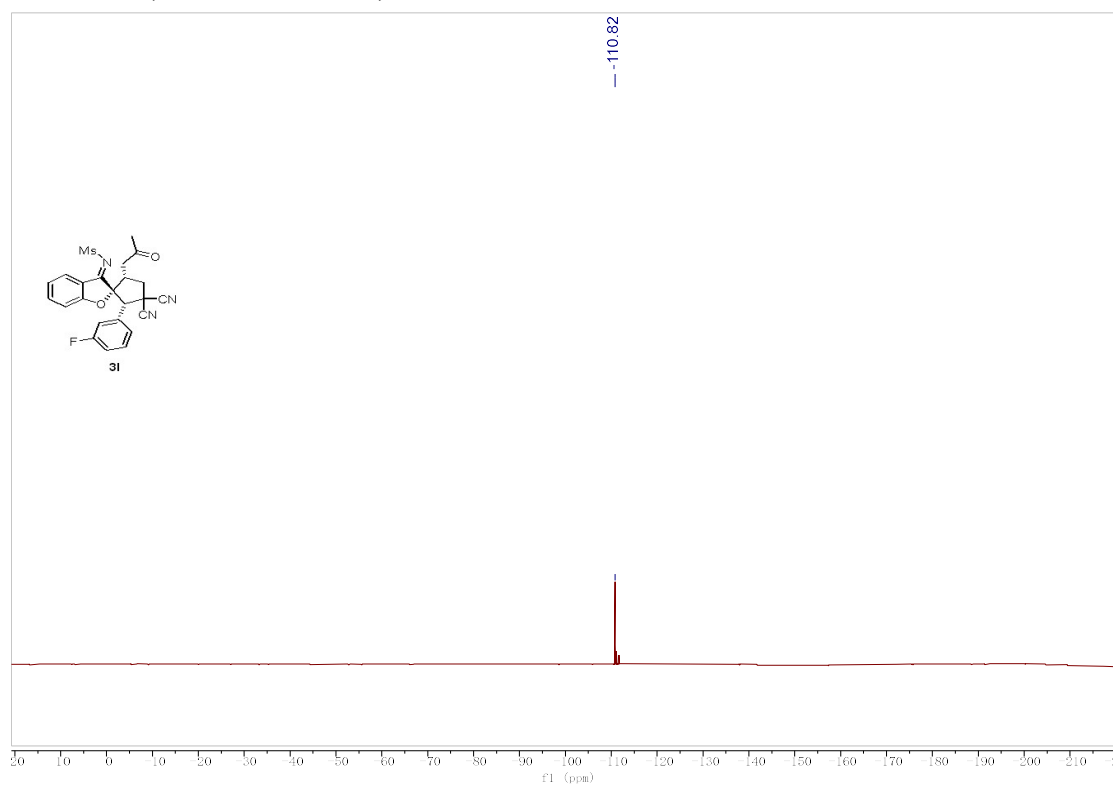

**<sup>1</sup>H NMR (400 MHz, CDCl<sub>3</sub>) of 3m**

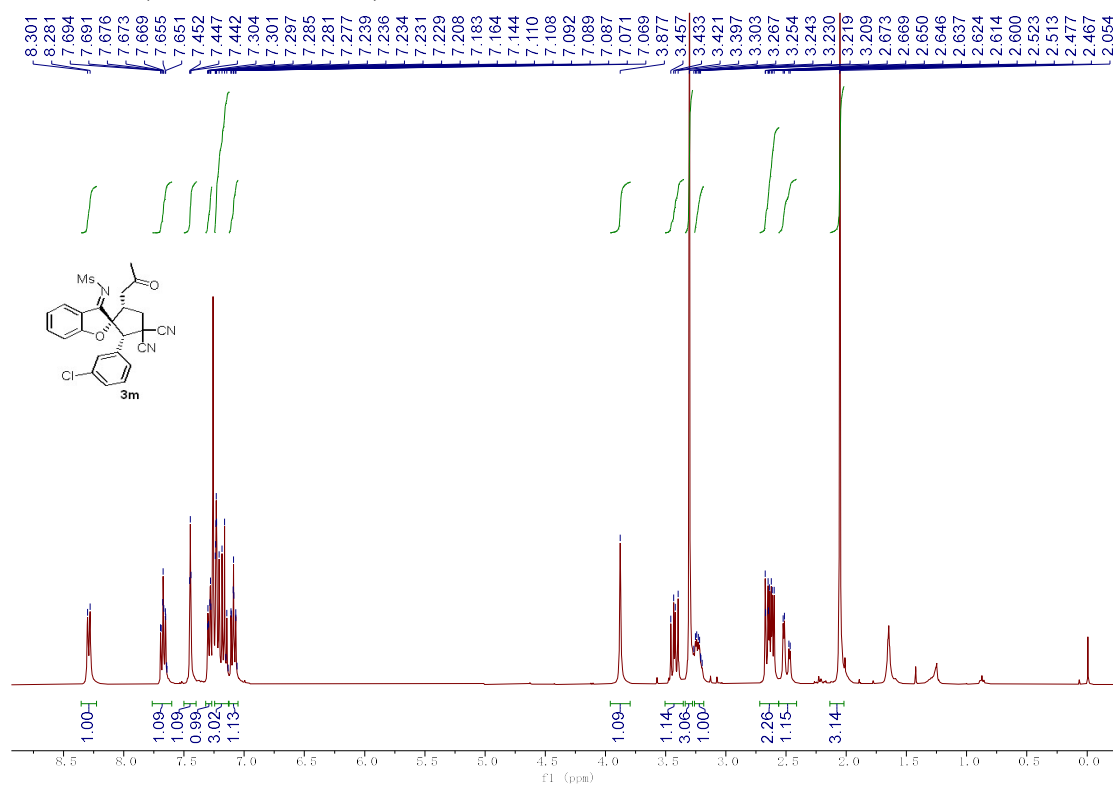

**<sup>13</sup>C NMR (100 MHz, CDCl<sub>3</sub>) of 3m**

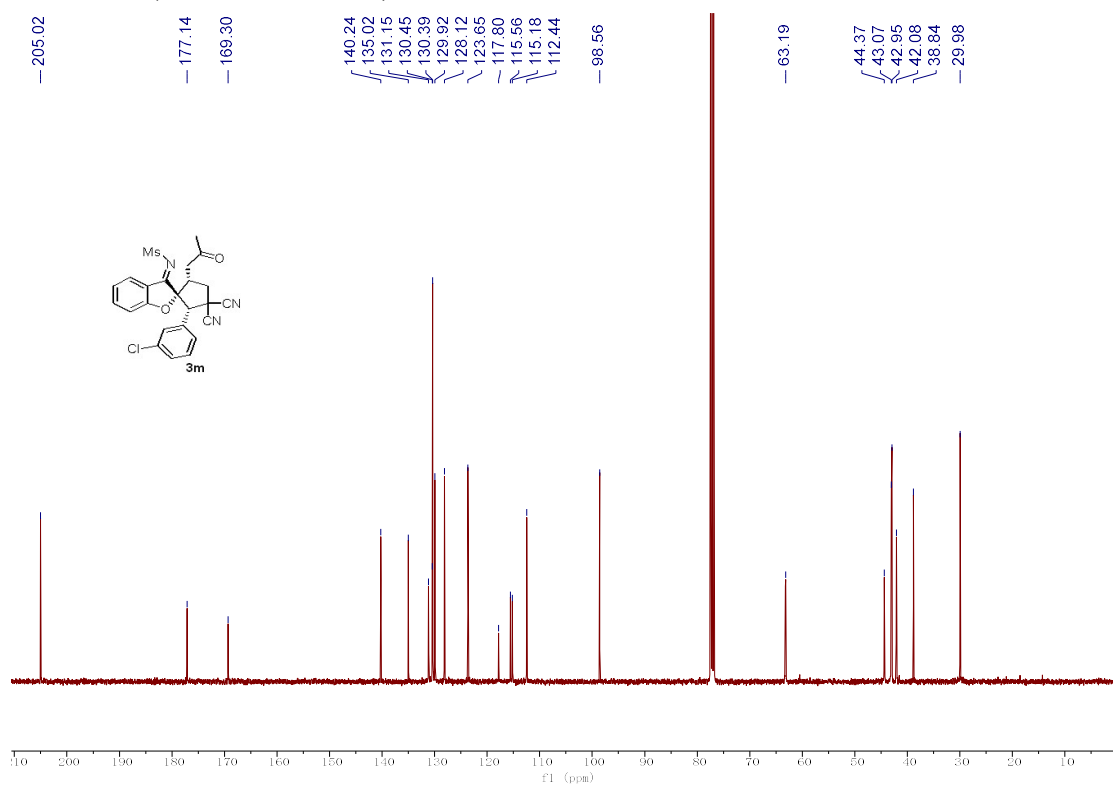

### <sup>1</sup>H NMR (400 MHz, CDCl<sub>3</sub>) of 3n

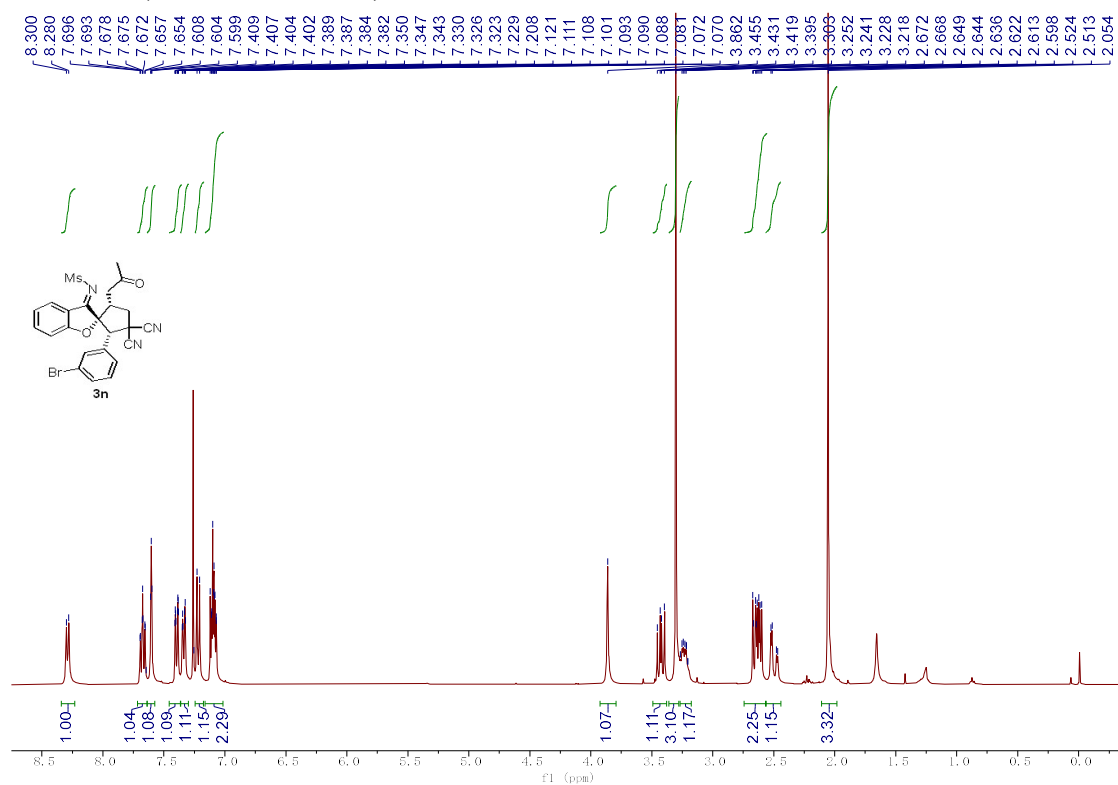

### <sup>13</sup>C NMR (100 MHz, CDCl<sub>3</sub>) of 3n

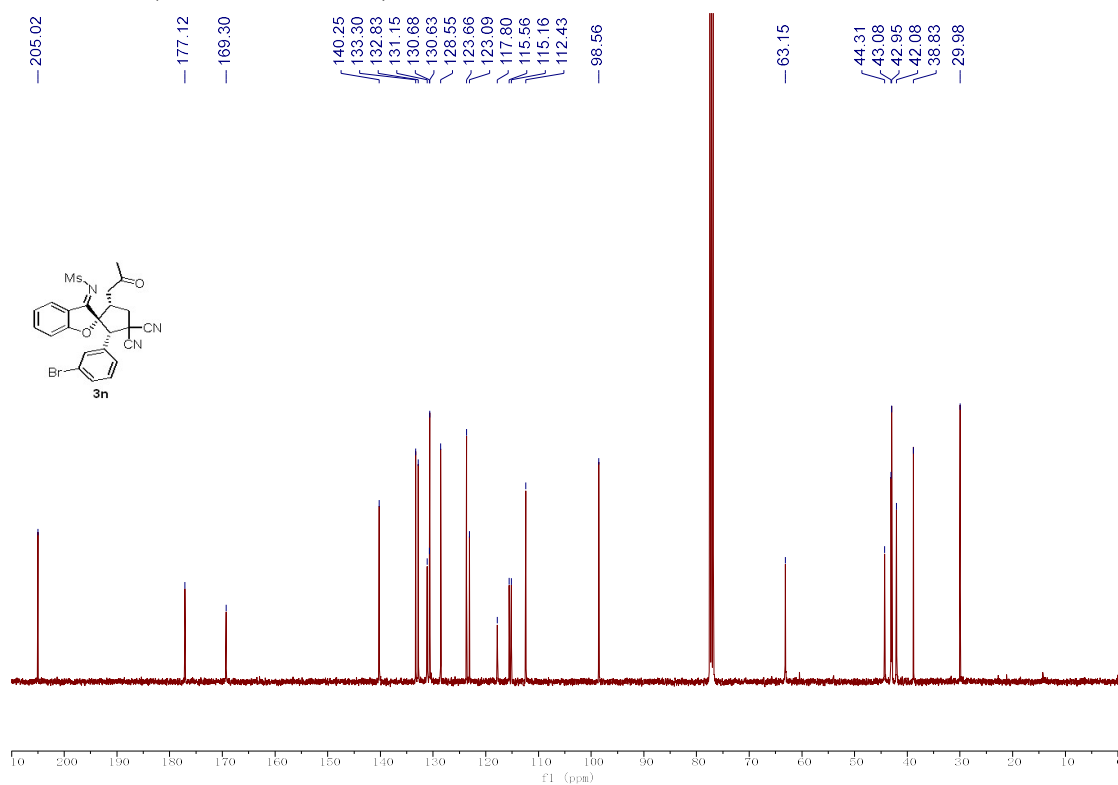

### $^1\text{H}$ NMR (400 MHz, $\text{CDCl}_3$ ) of **3o**

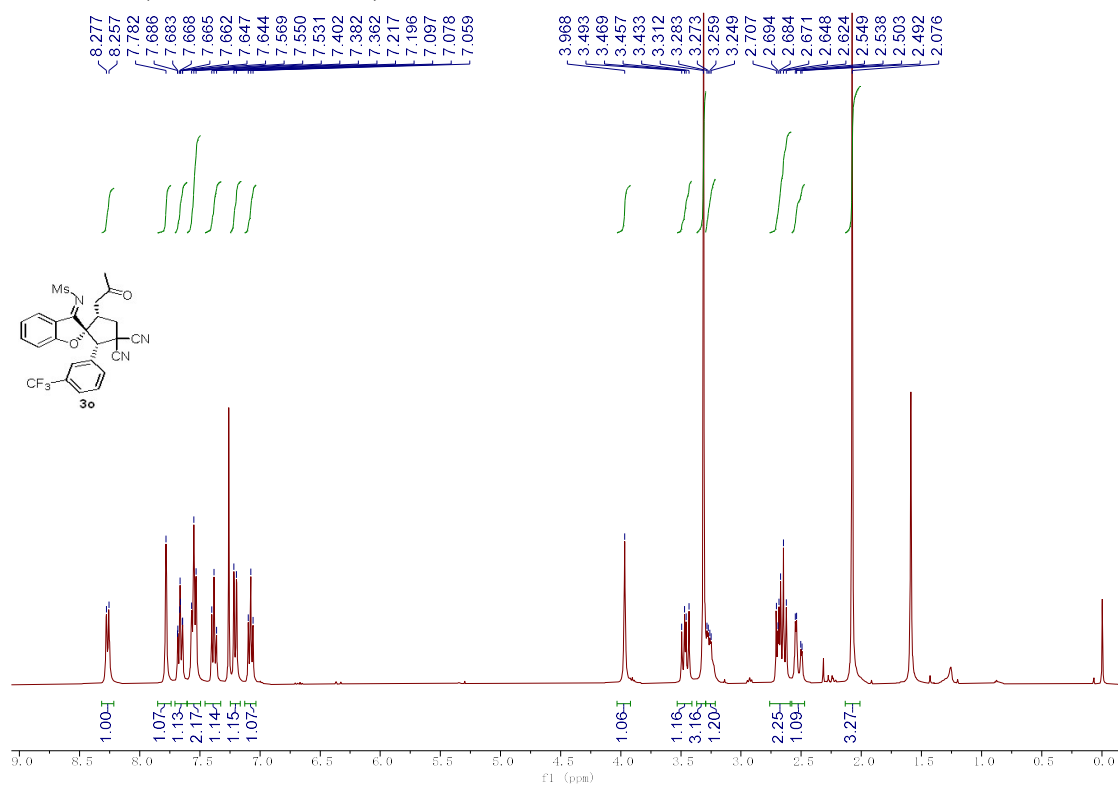

### $^{13}\text{C}$ NMR (100 MHz, $\text{CDCl}_3$ ) of **3o**

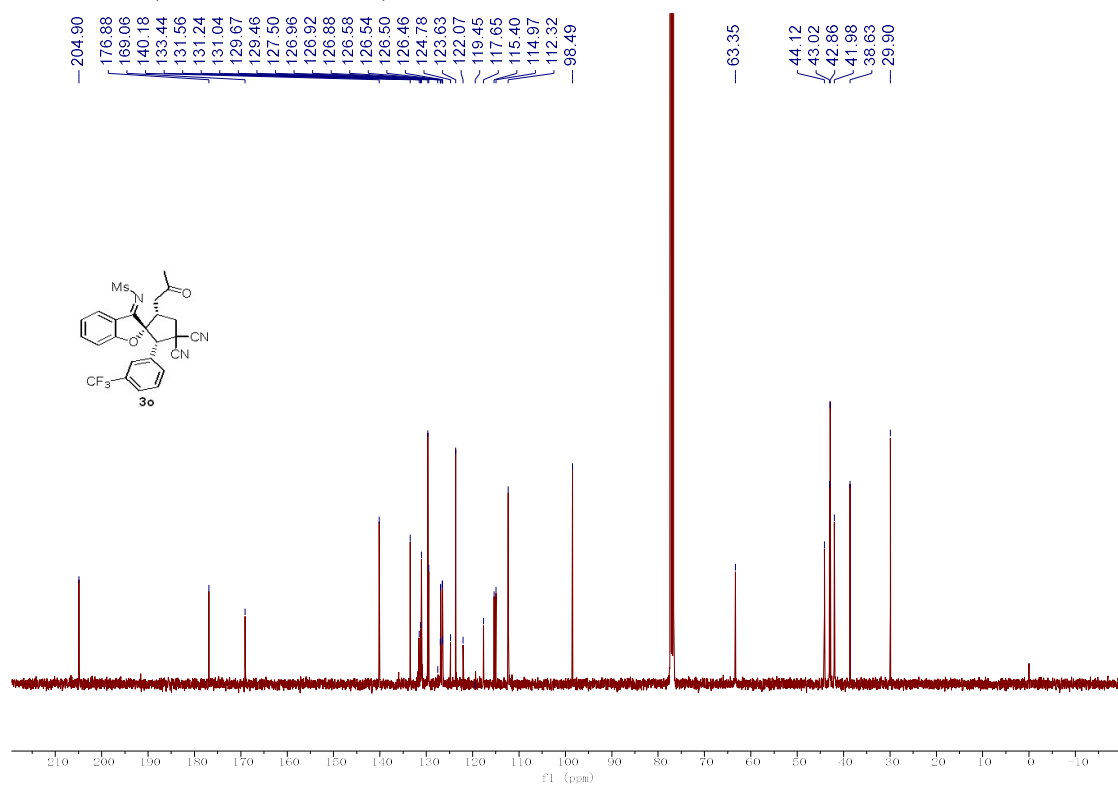

**<sup>19</sup>F NMR (377 MHz, CDCl<sub>3</sub>) of 3o**

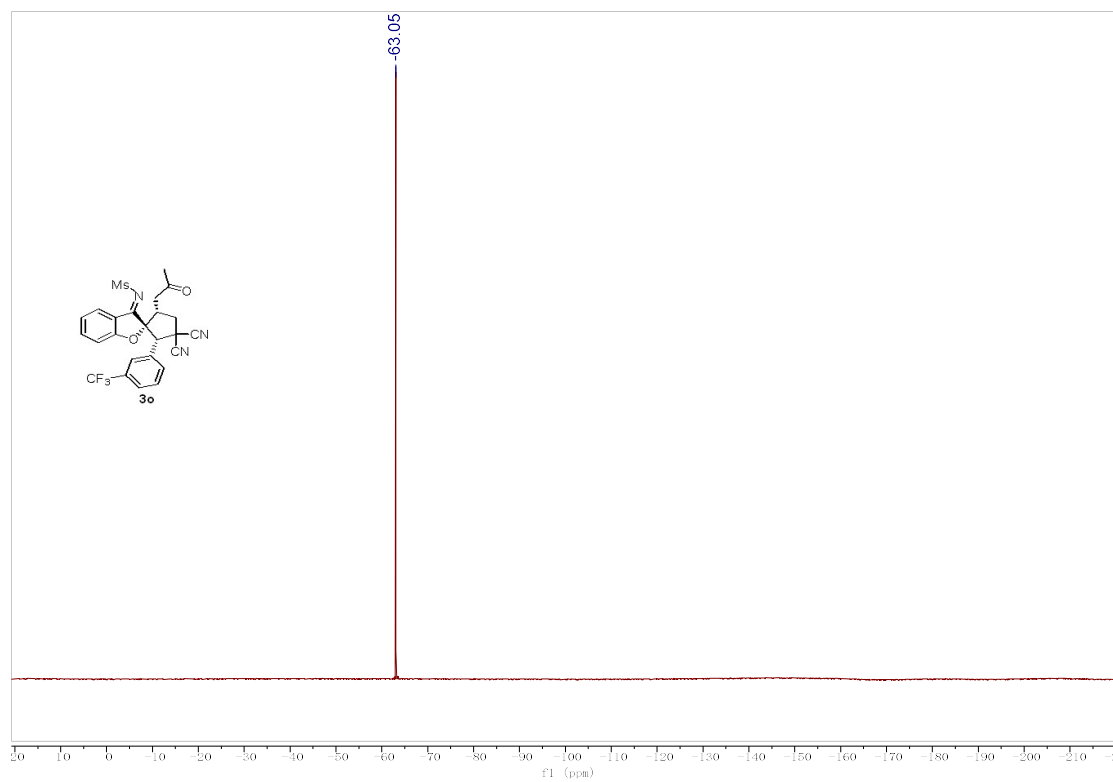

### $^1\text{H}$ NMR (400 MHz, $\text{CDCl}_3$ ) of **3p**

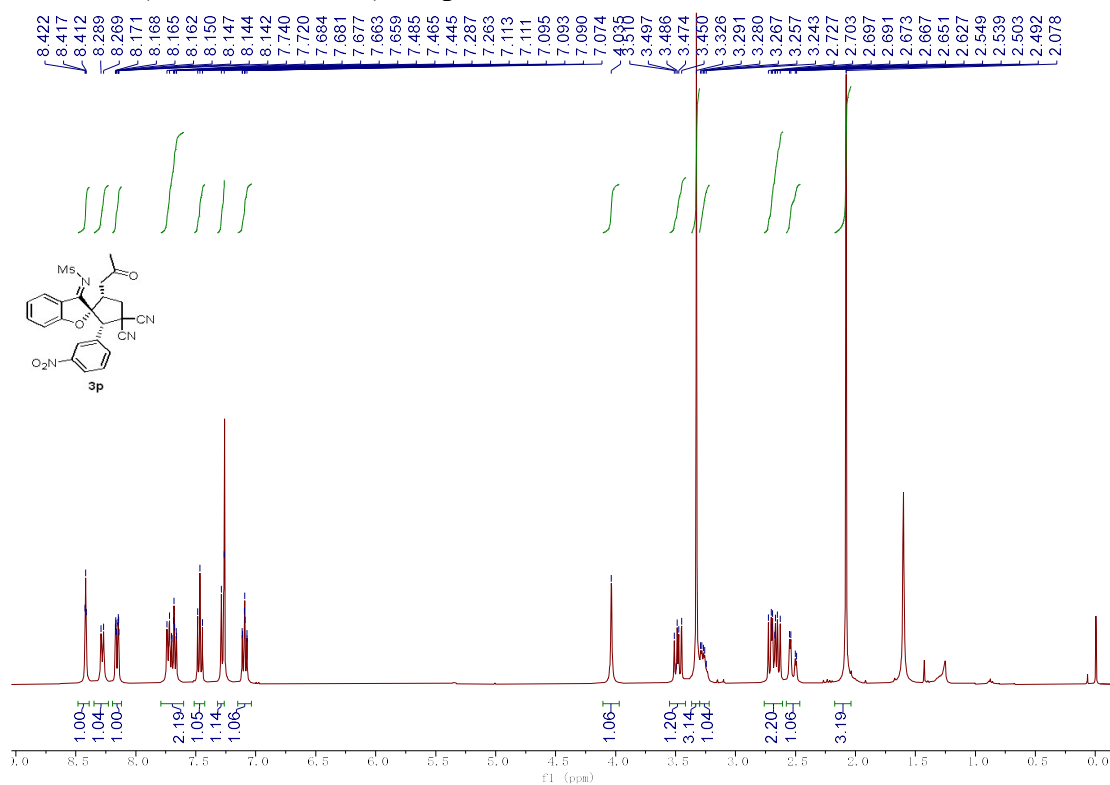

### $^{13}\text{C}$ NMR (100 MHz, $\text{CDCl}_3$ ) of **3p**

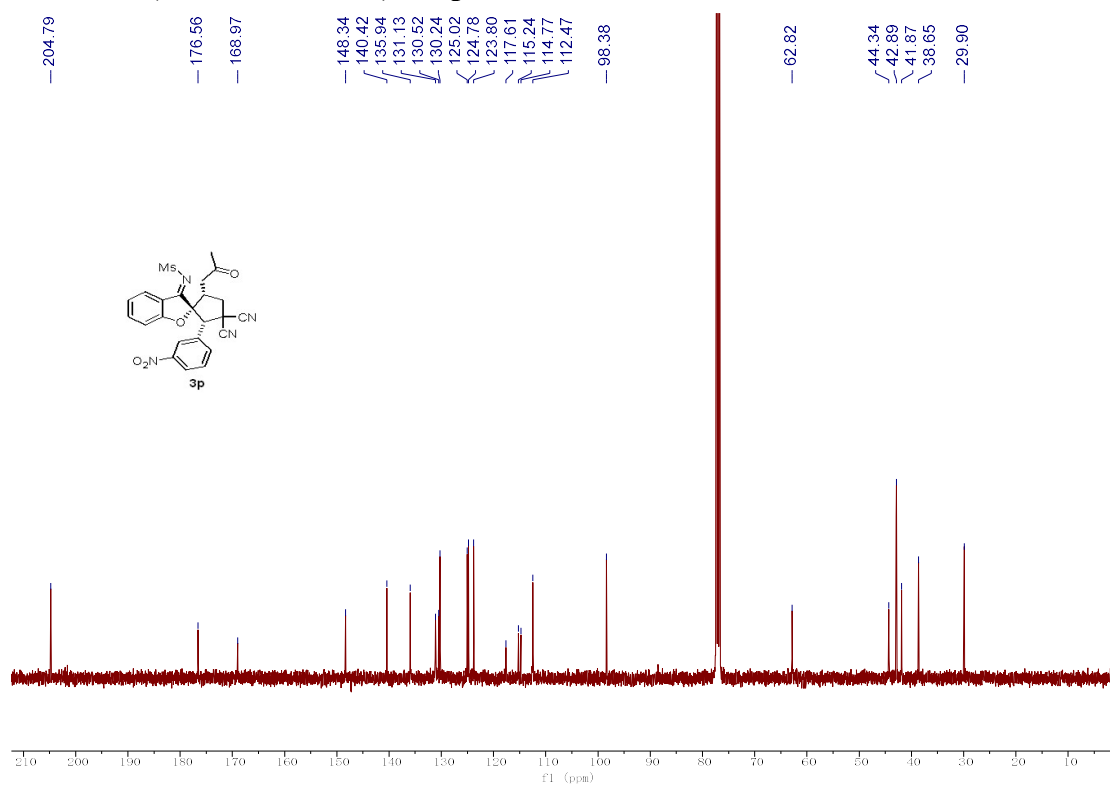



### $^1\text{H}$ NMR (400 MHz, $\text{CDCl}_3$ ) of **3q**

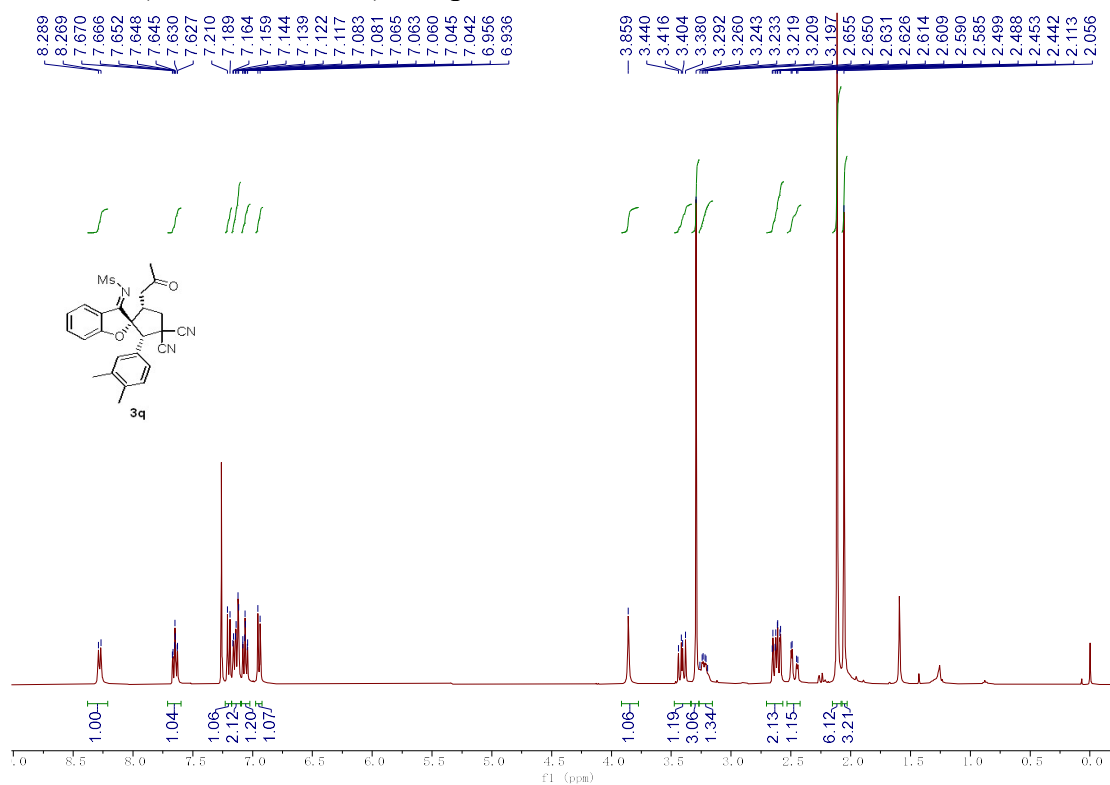

### $^{13}\text{C}$ NMR (100 MHz, $\text{CDCl}_3$ ) of **3q**

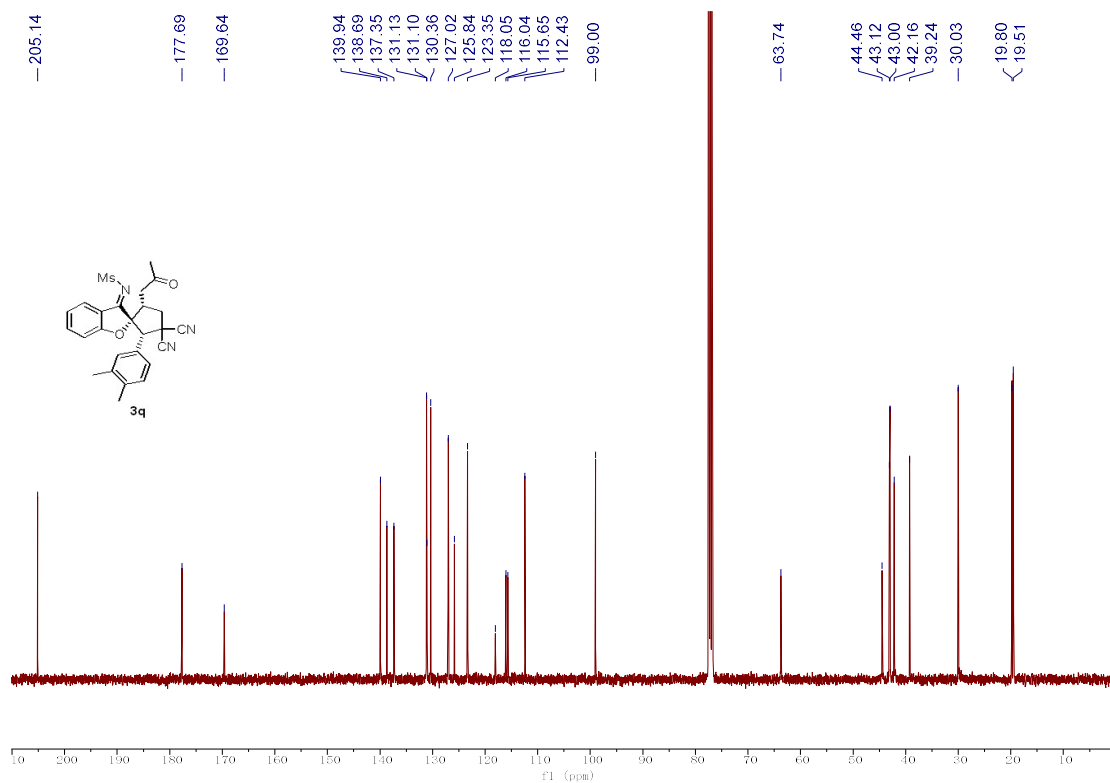

**<sup>1</sup>H NMR (400 MHz, CDCl<sub>3</sub>) of 3r**

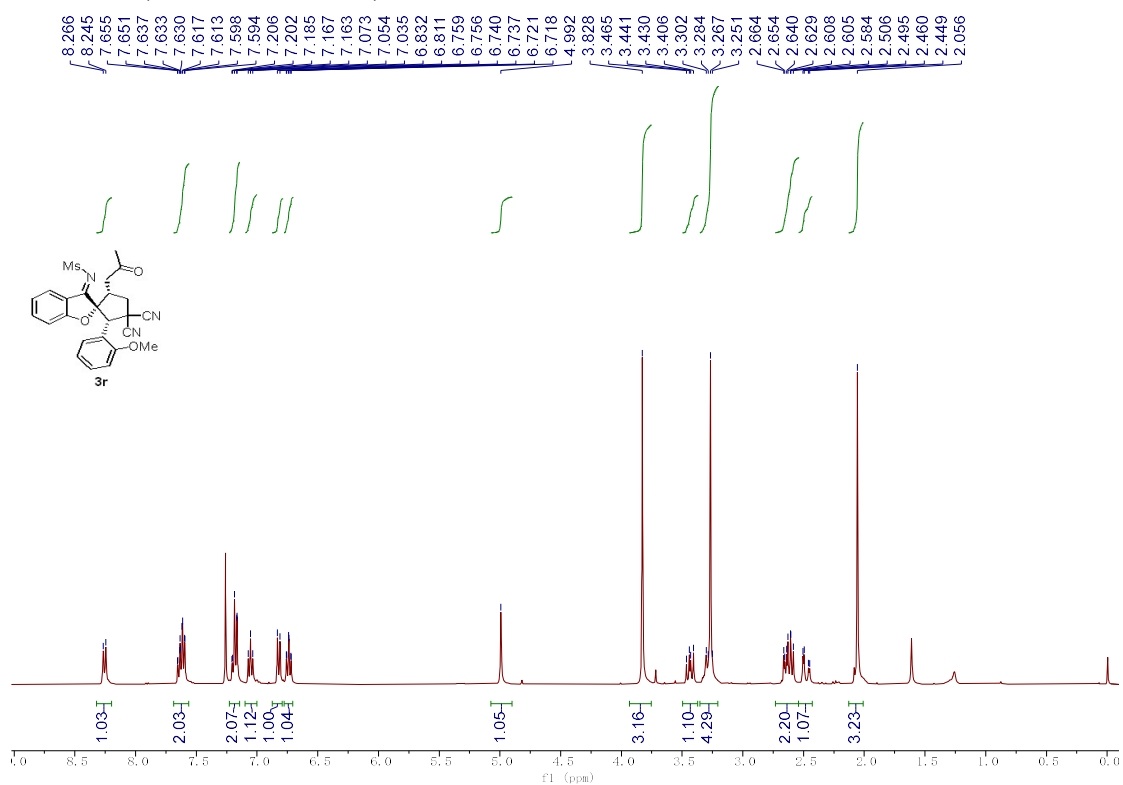

**<sup>13</sup>C NMR (100 MHz, CDCl<sub>3</sub>) of 3r**

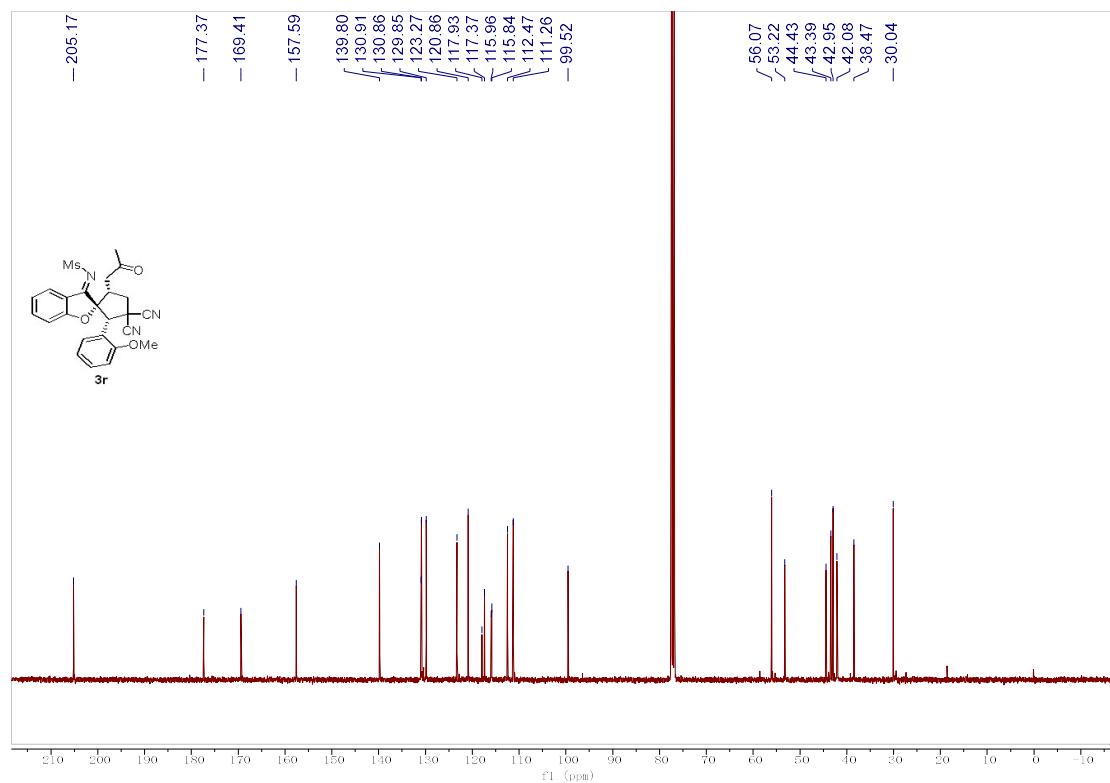

### <sup>1</sup>H NMR (400 MHz, CDCl<sub>3</sub>) of 3s

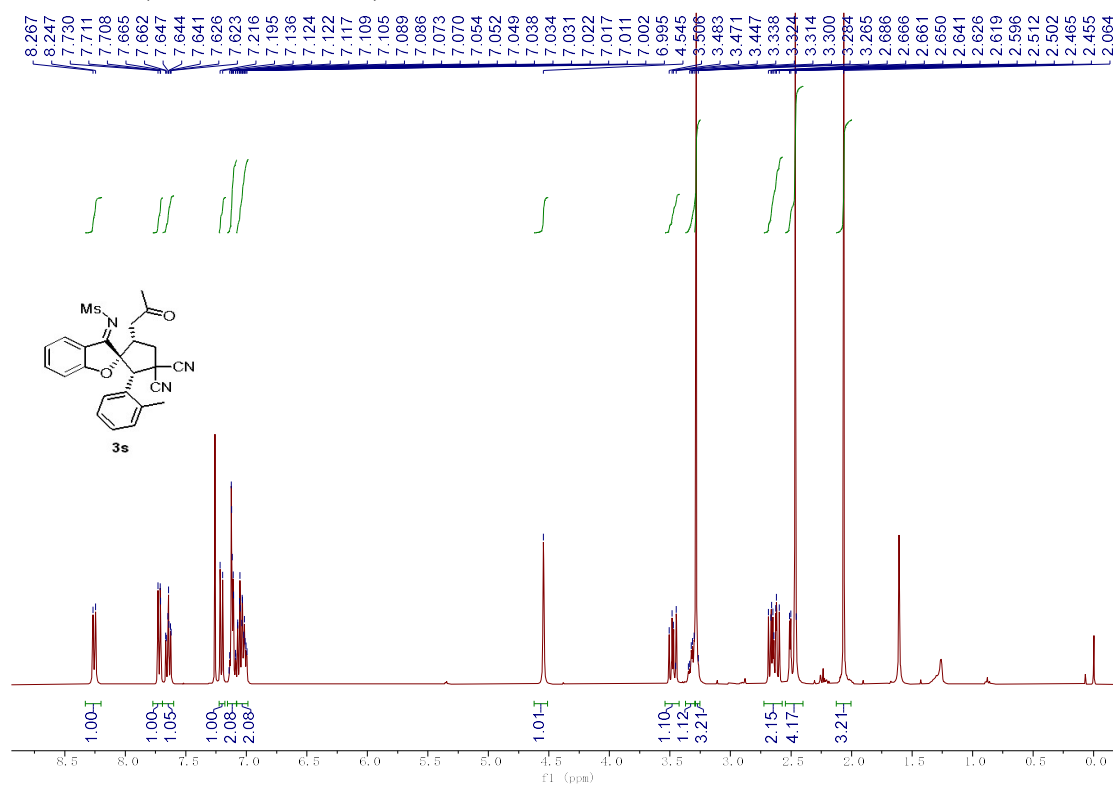

### <sup>13</sup>C NMR (100 MHz, CDCl<sub>3</sub>) of 3s

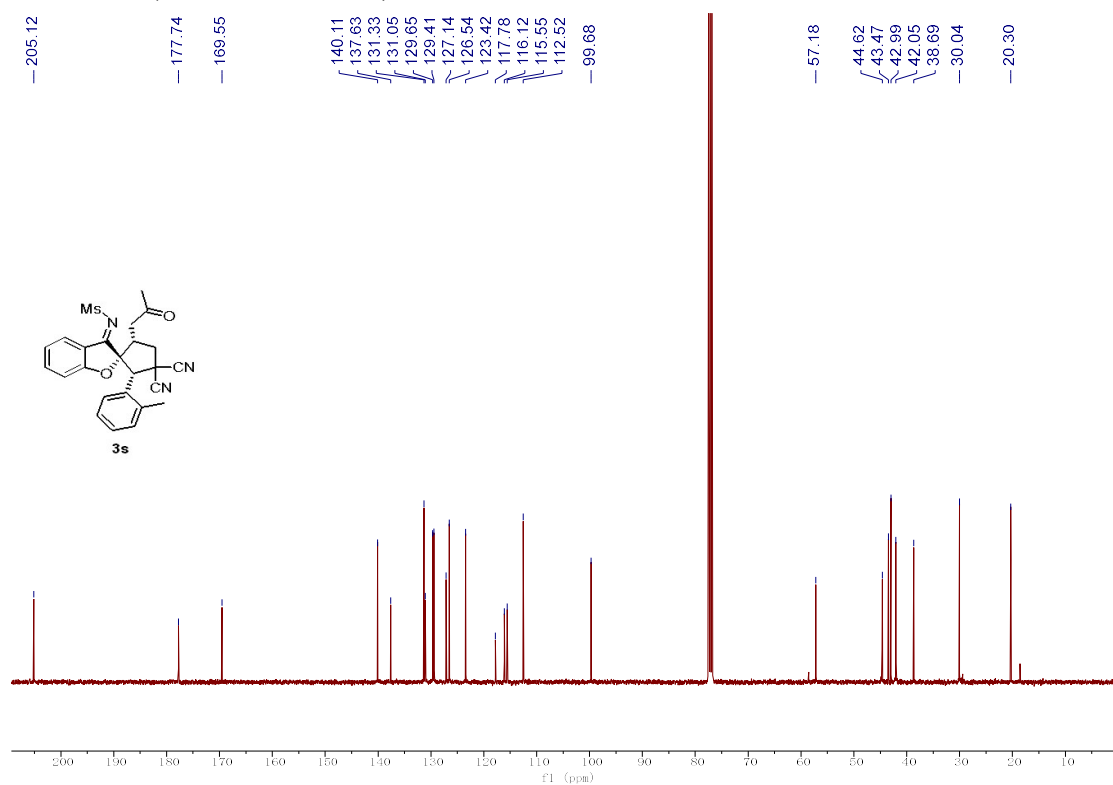

### $^1\text{H}$ NMR (400 MHz, $\text{CDCl}_3$ ) of **3t**

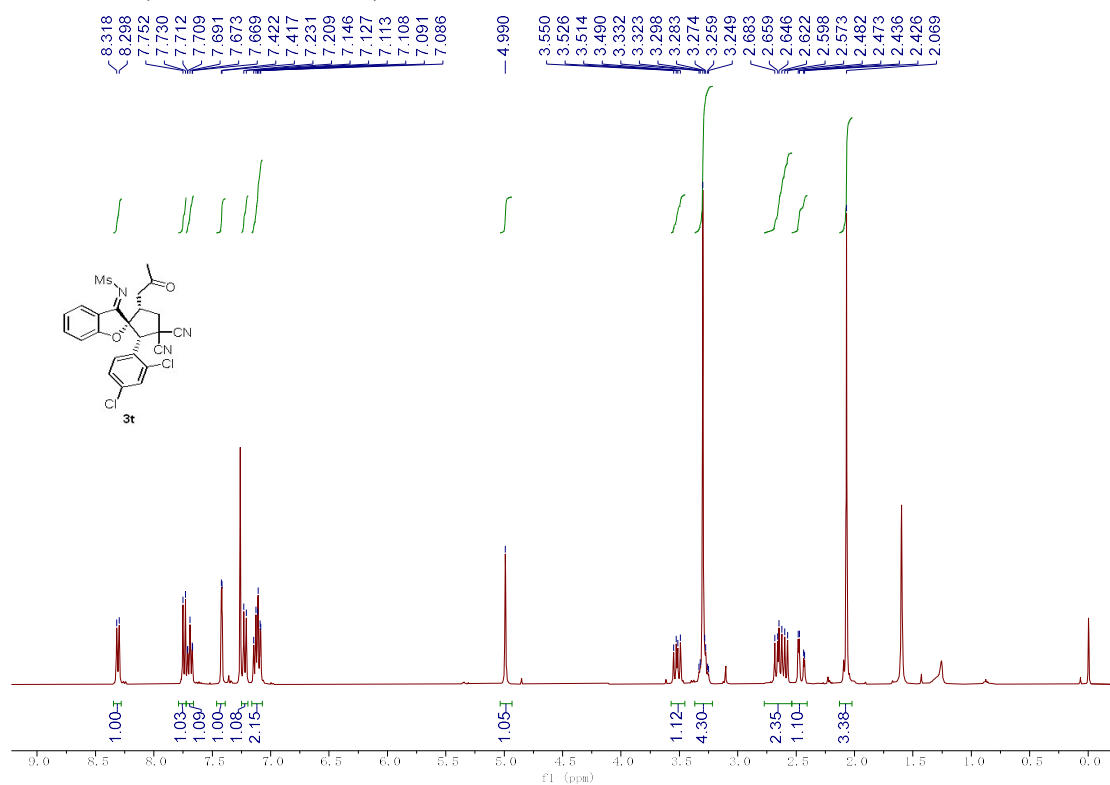

### $^{13}\text{C}$ NMR (100 MHz, $\text{CDCl}_3$ ) of **3t**

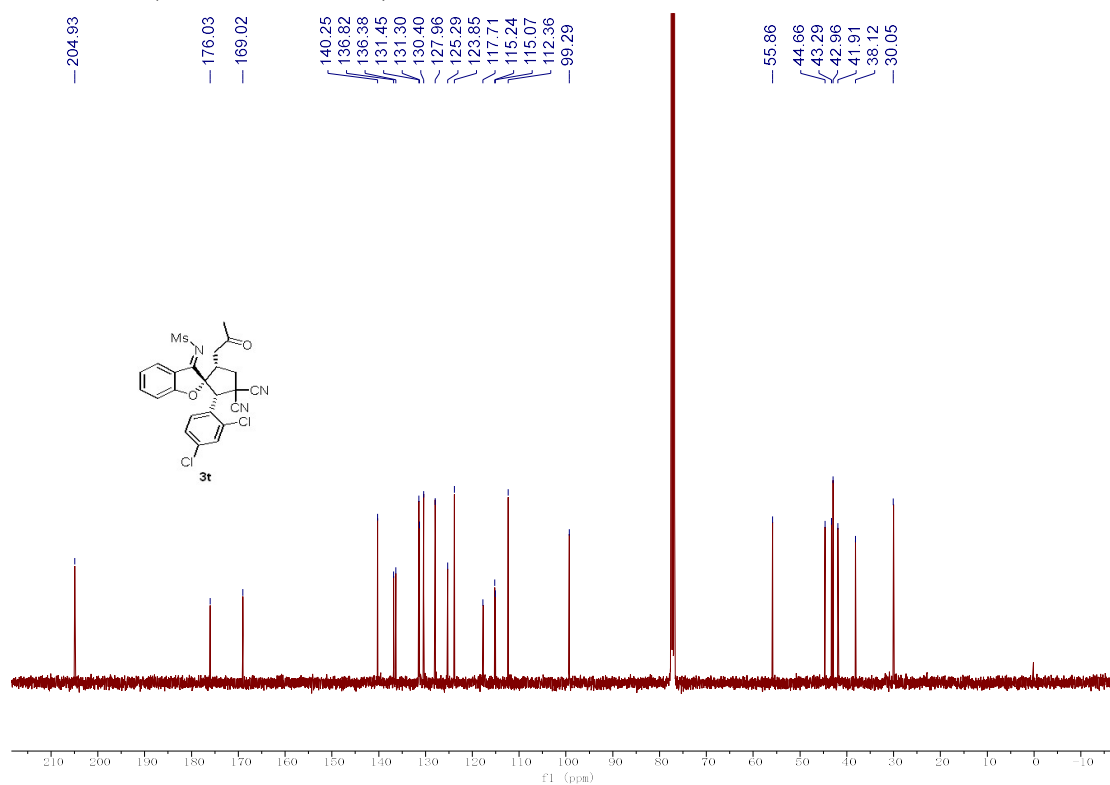

**<sup>1</sup>H NMR (400 MHz, CDCl<sub>3</sub>) of 3u**

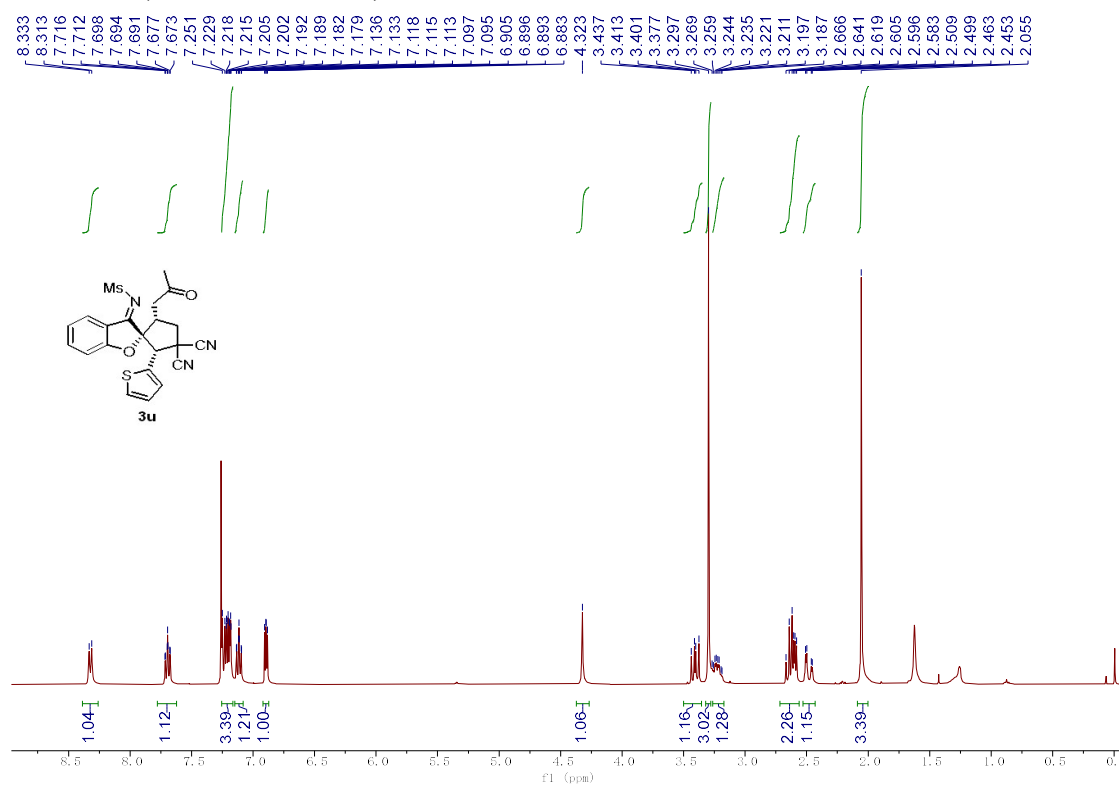

**<sup>13</sup>C NMR (100 MHz, CDCl<sub>3</sub>) of 3u**

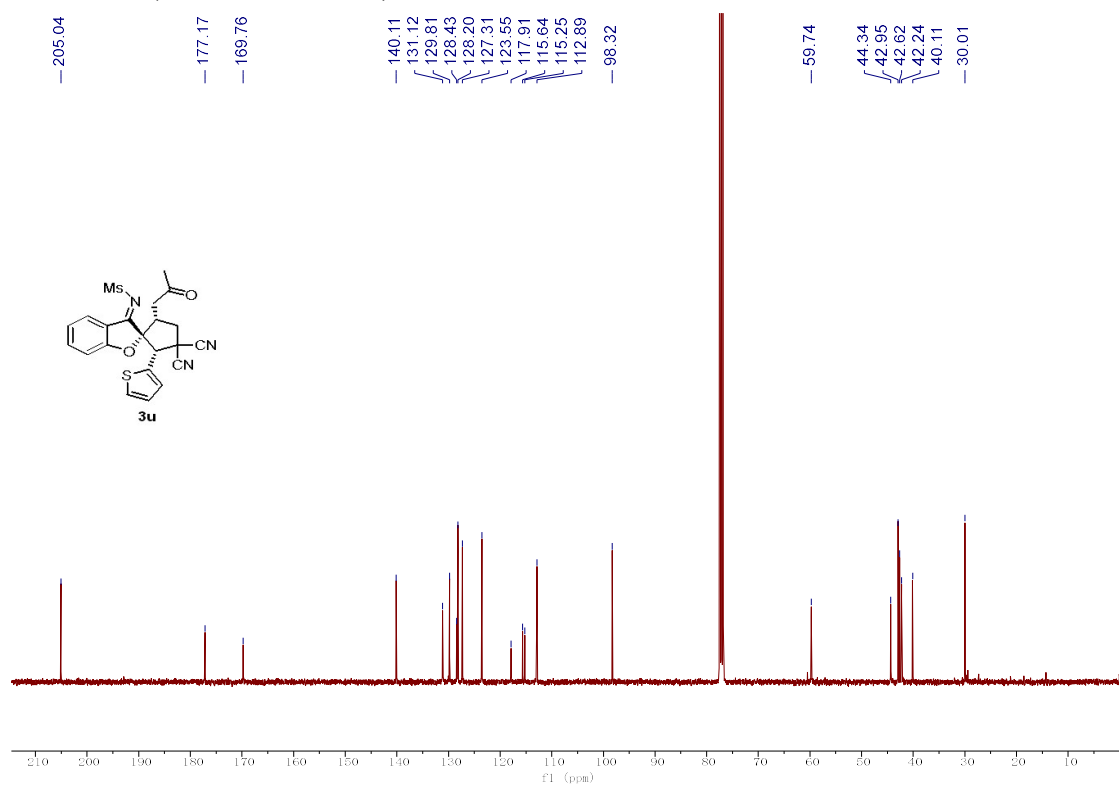

**<sup>1</sup>H NMR (400 MHz, CDCl<sub>3</sub>) of 3v**

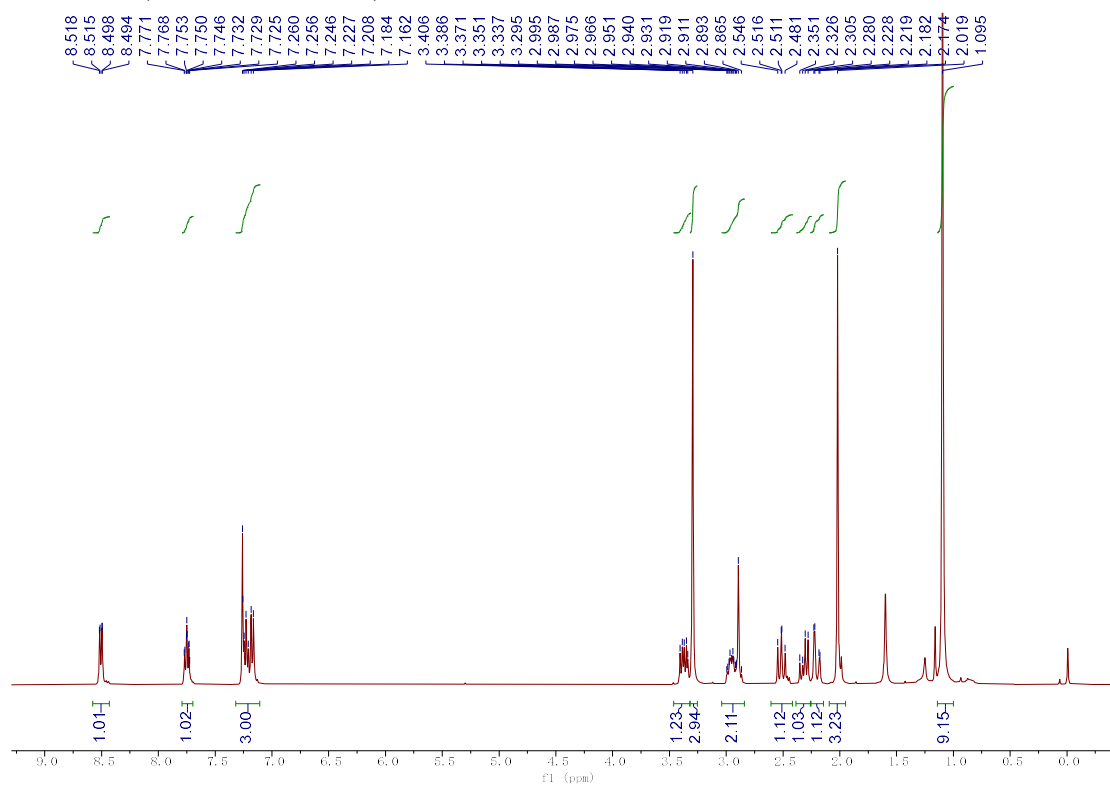

**<sup>13</sup>C NMR (100 MHz, CDCl<sub>3</sub>) of 3v**

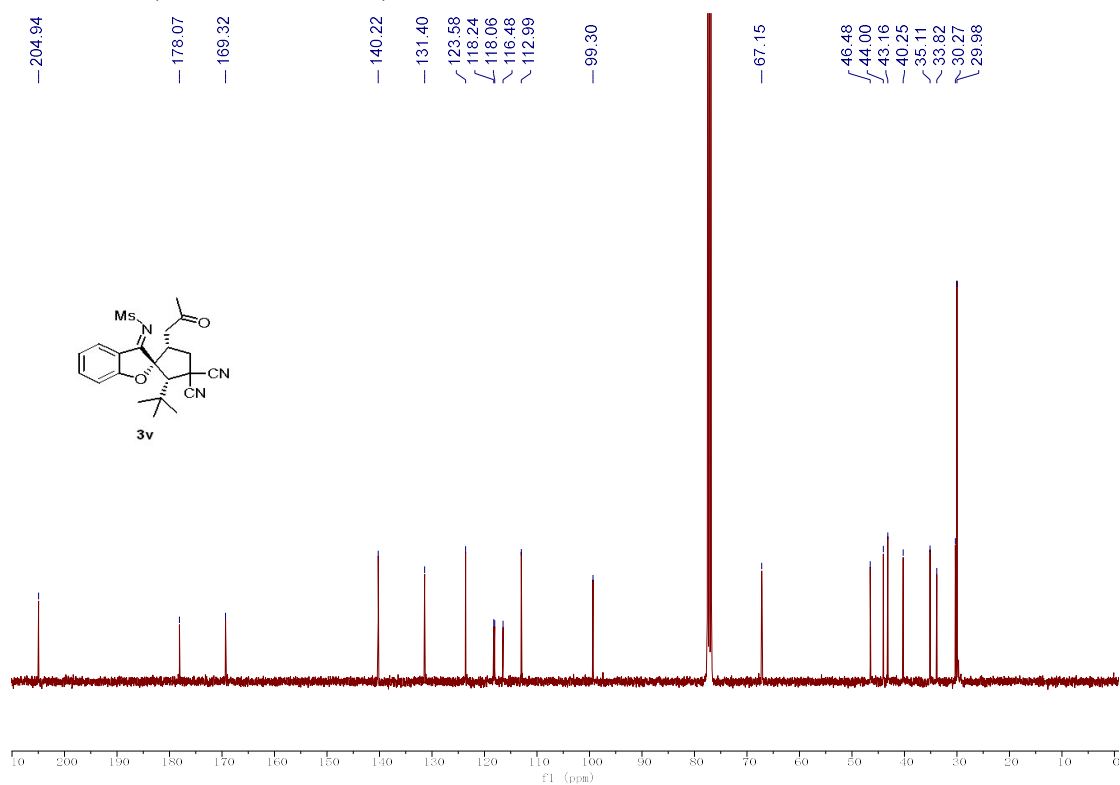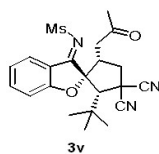

**<sup>1</sup>H NMR (400 MHz, CDCl<sub>3</sub>) of 3w**

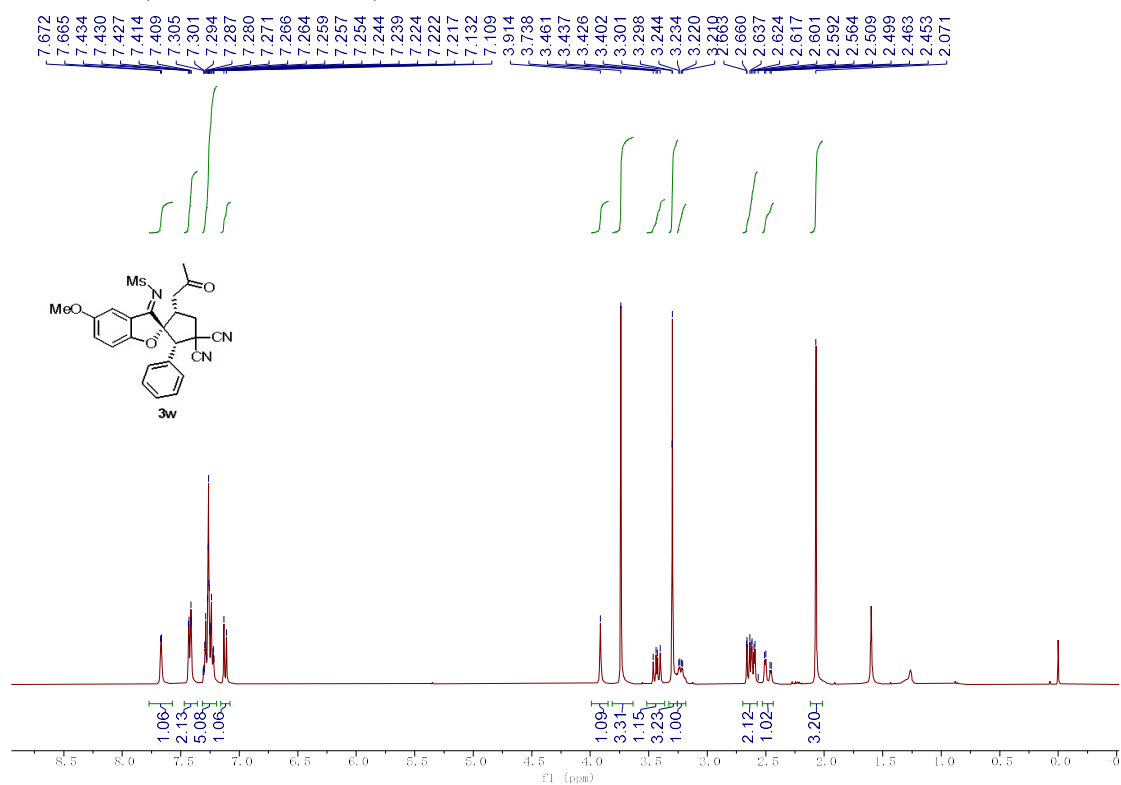

**<sup>13</sup>C NMR (100 MHz, CDCl<sub>3</sub>) of 3w**

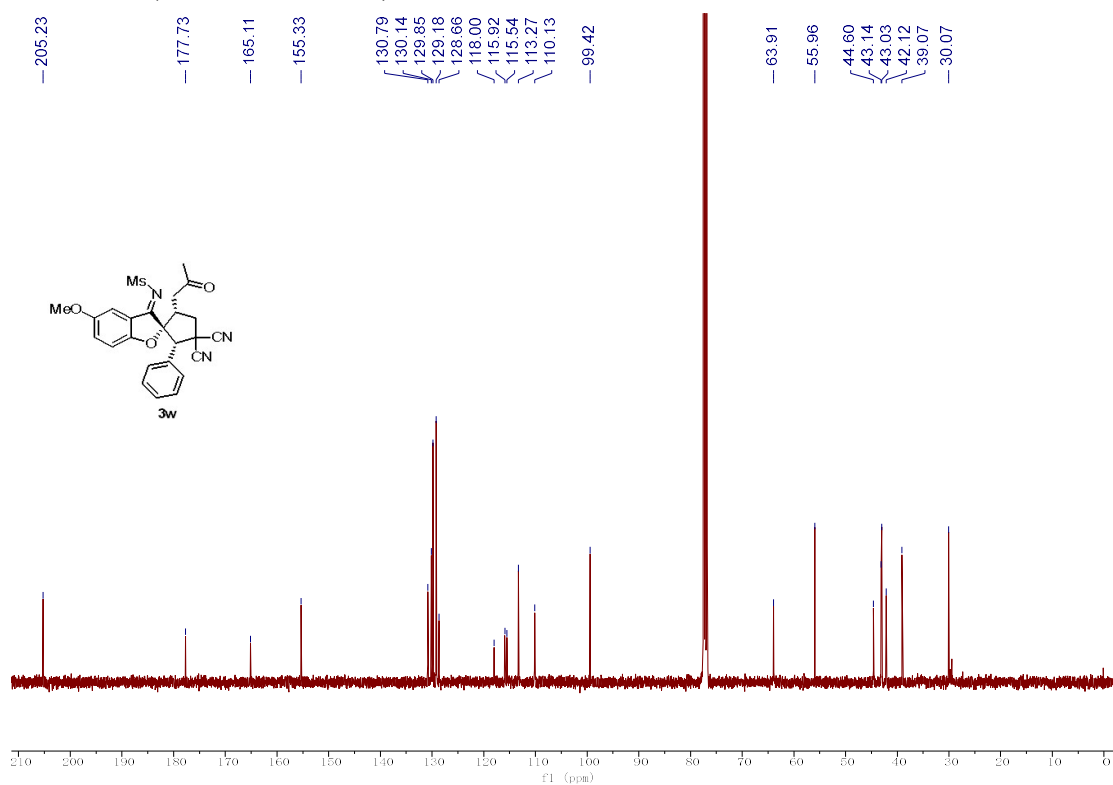

### $^1\text{H}$ NMR (400 MHz, $\text{CDCl}_3$ ) of **3x**

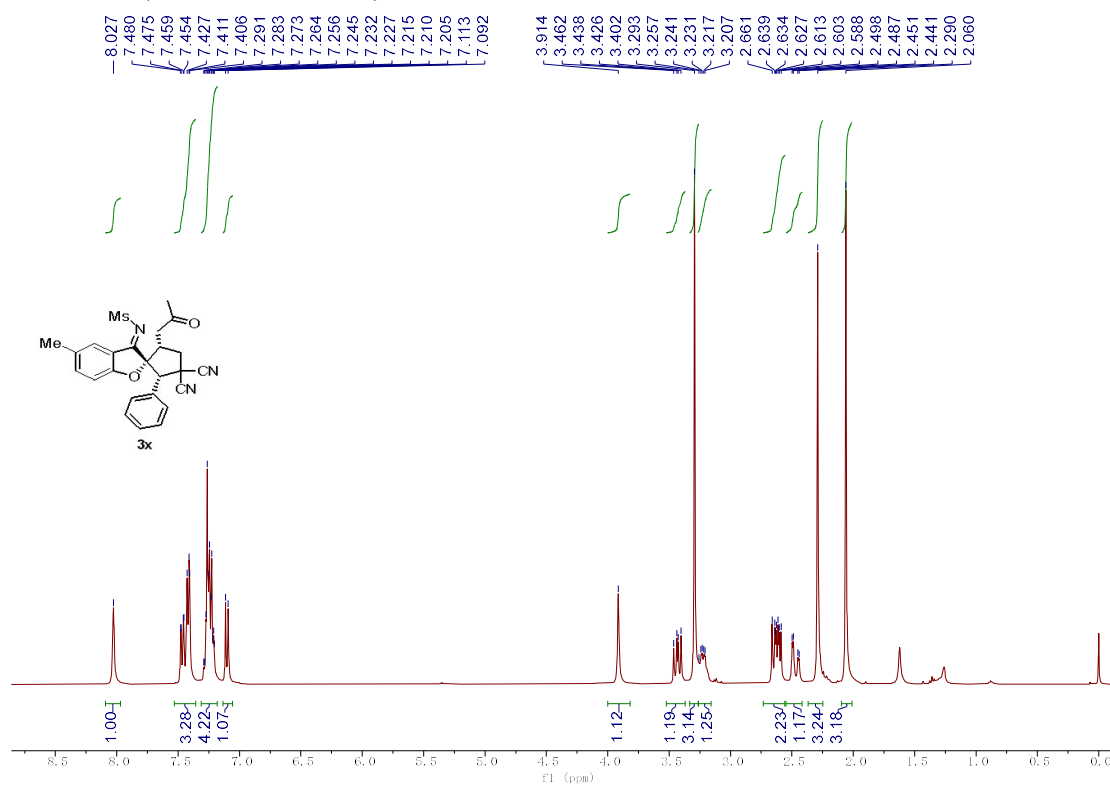

### $^{13}\text{C}$ NMR (100 MHz, $\text{CDCl}_3$ ) of **3x**

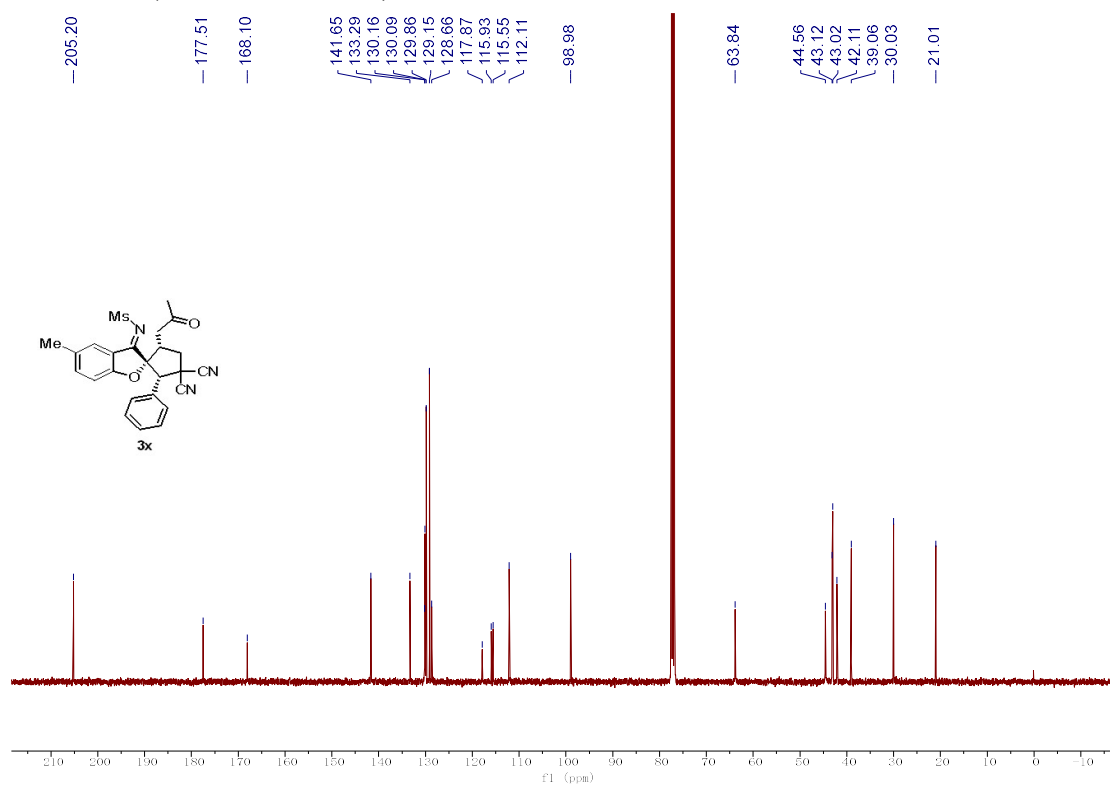



**<sup>1</sup>H NMR (400 MHz, CDCl<sub>3</sub>) of 3y**

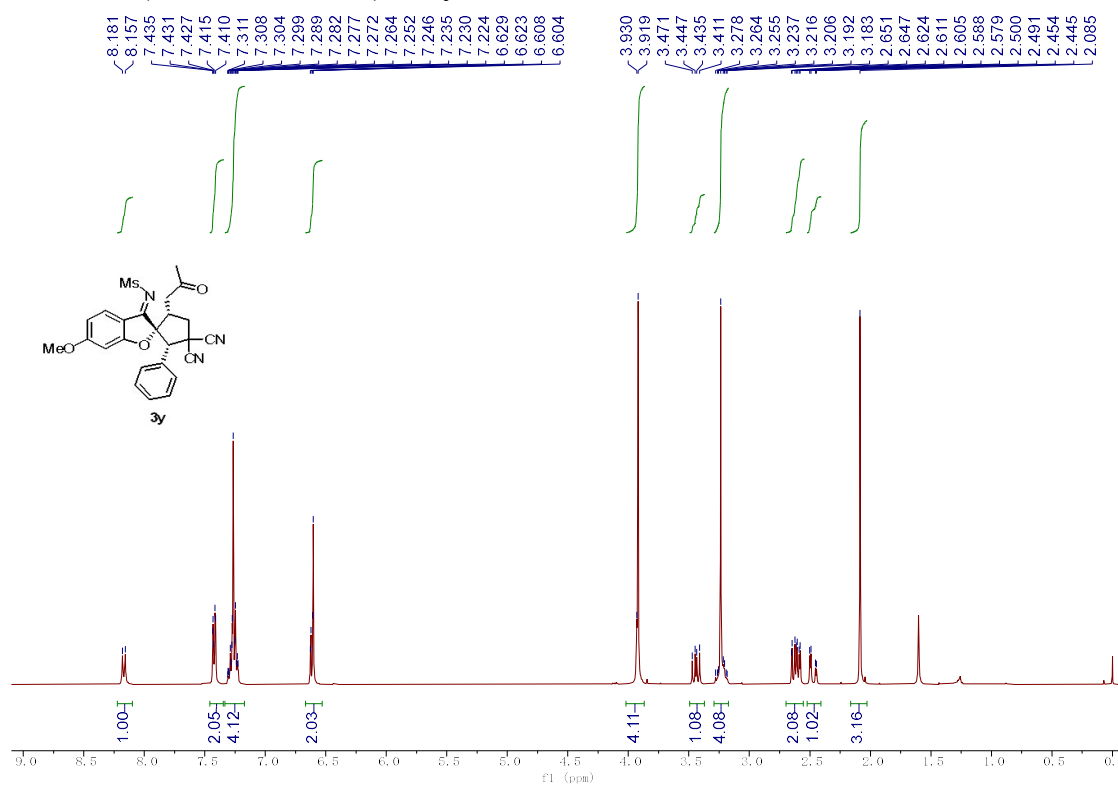

**<sup>13</sup>C NMR (100 MHz, CDCl<sub>3</sub>) of 3y**

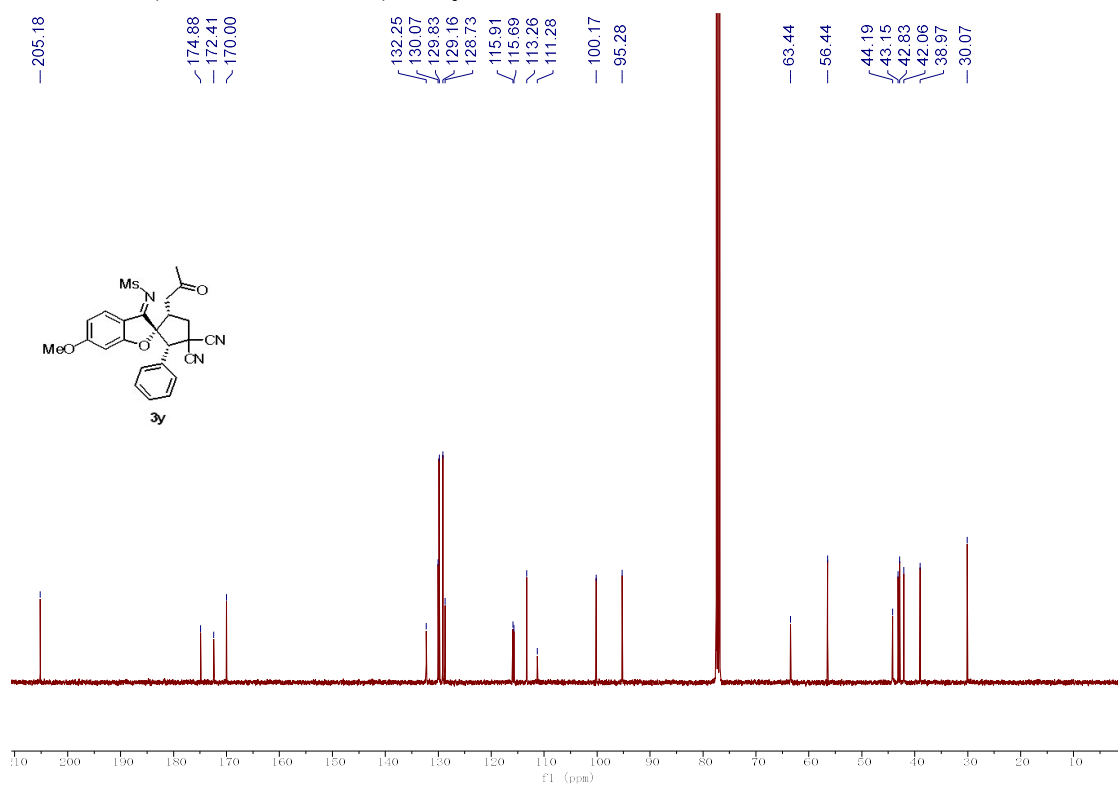

**<sup>1</sup>H NMR (400 MHz, CDCl<sub>3</sub>) of 3z**

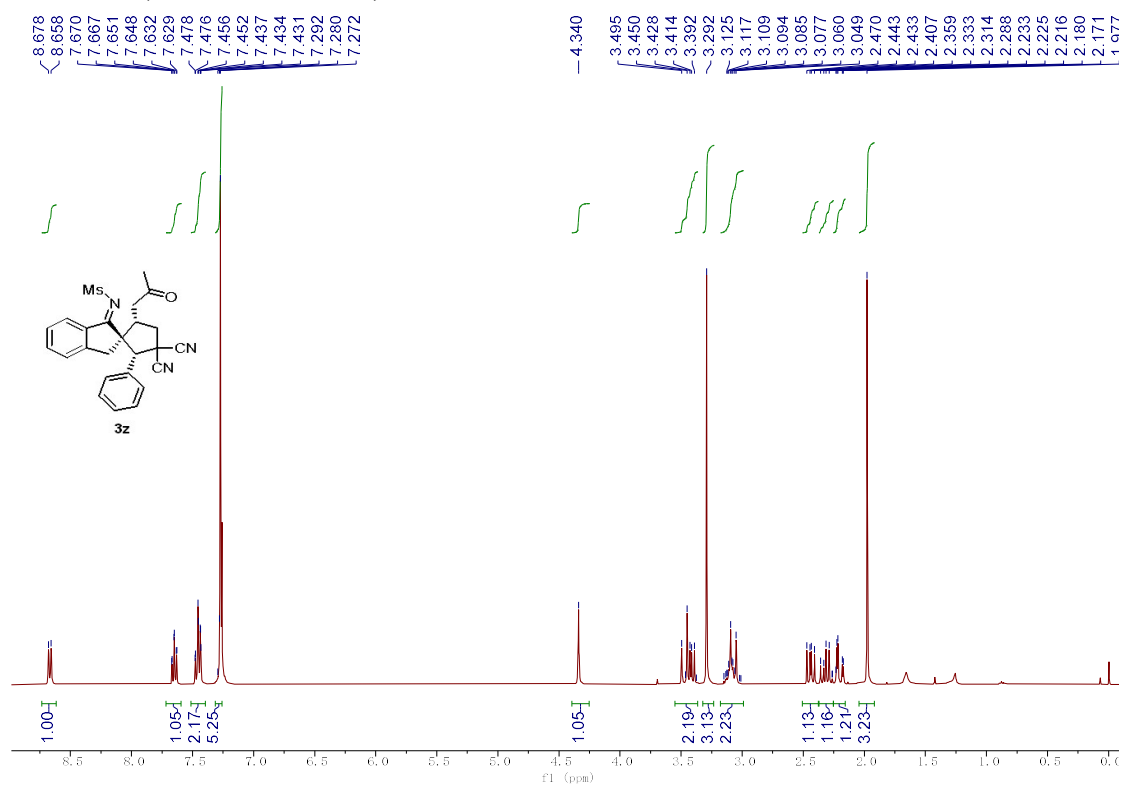

**<sup>13</sup>C NMR (100 MHz, CDCl<sub>3</sub>) of 3z**

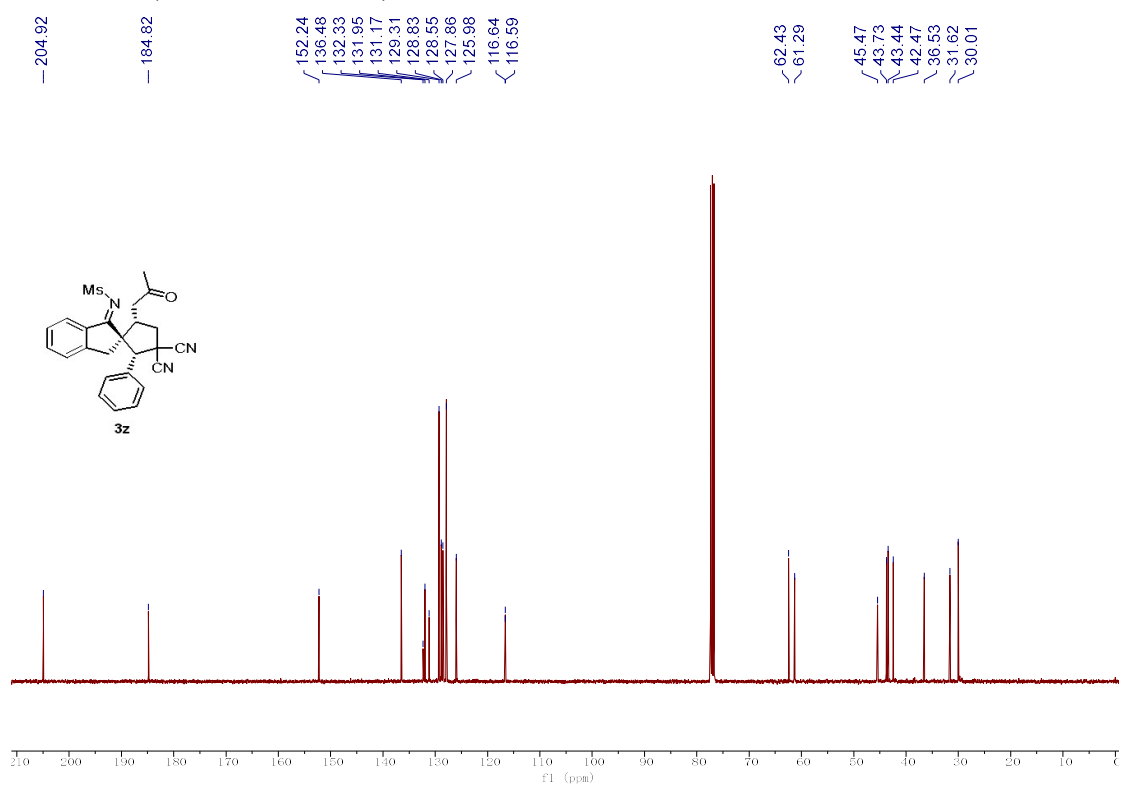

### <sup>1</sup>H NMR (400 MHz, CDCl<sub>3</sub>) of 3aa

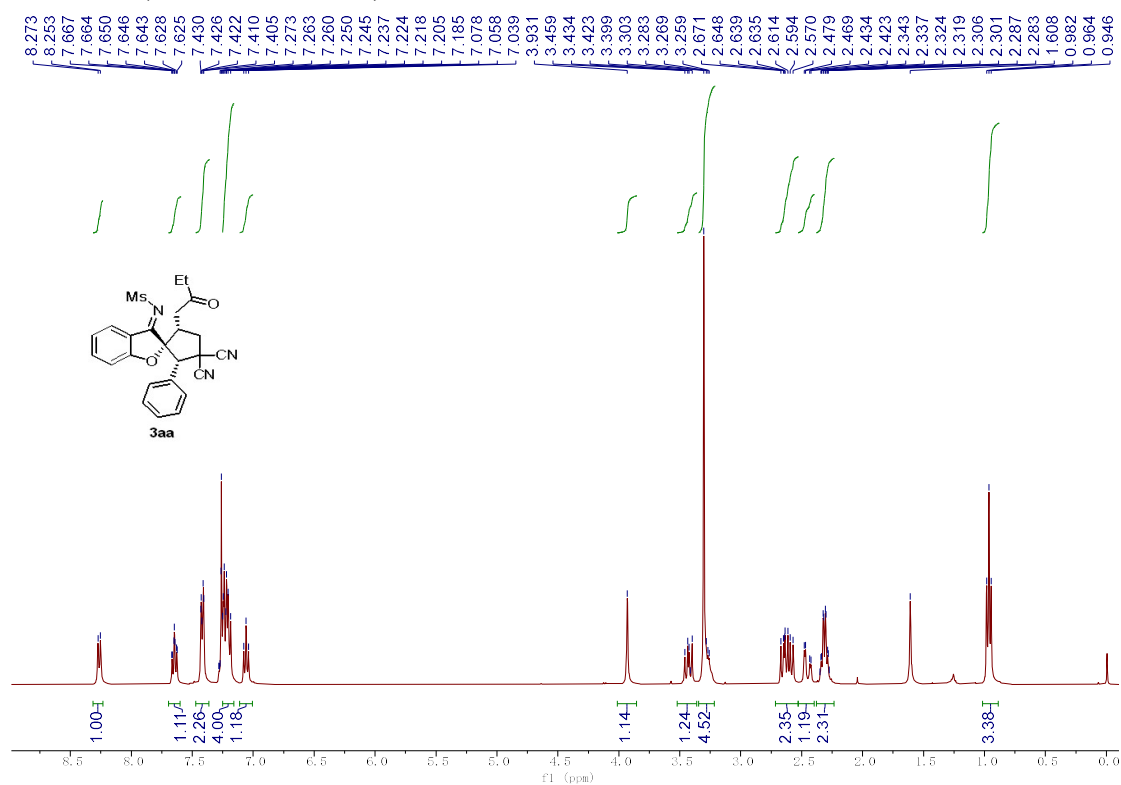

### <sup>13</sup>C NMR (100 MHz, CDCl<sub>3</sub>) of 3aa

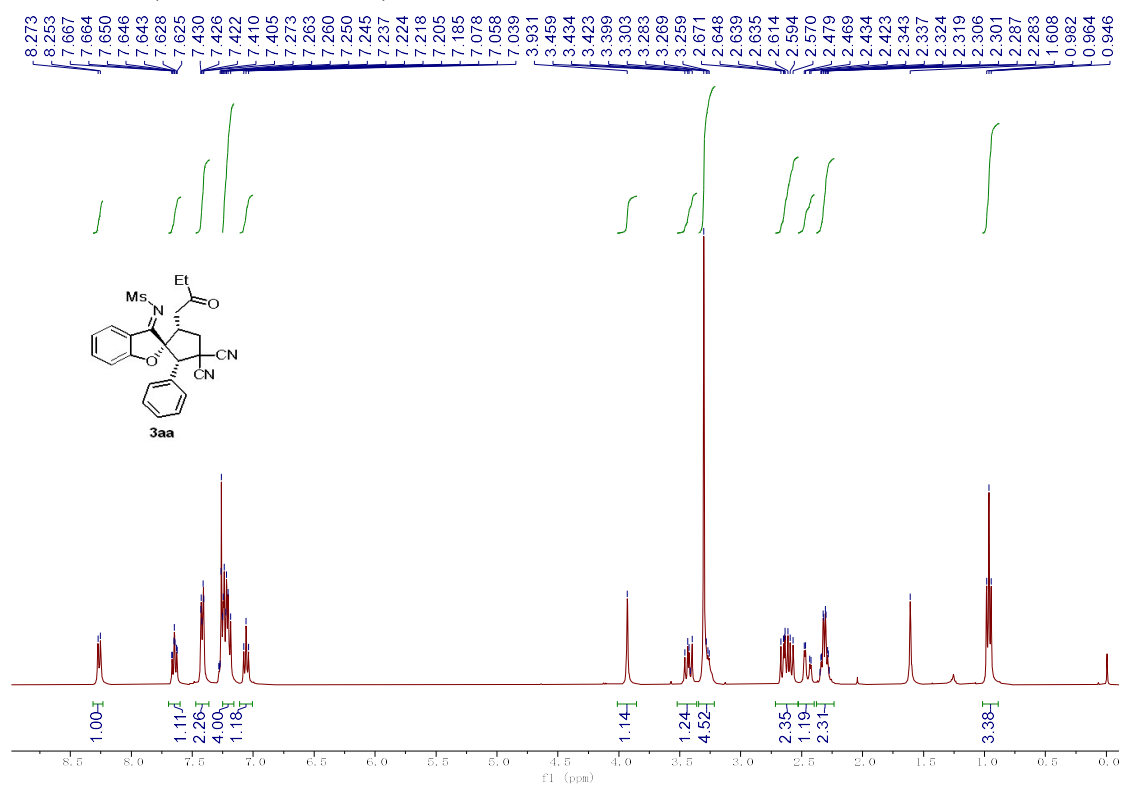

### <sup>1</sup>H NMR (400 MHz, CDCl<sub>3</sub>) of **3ab**

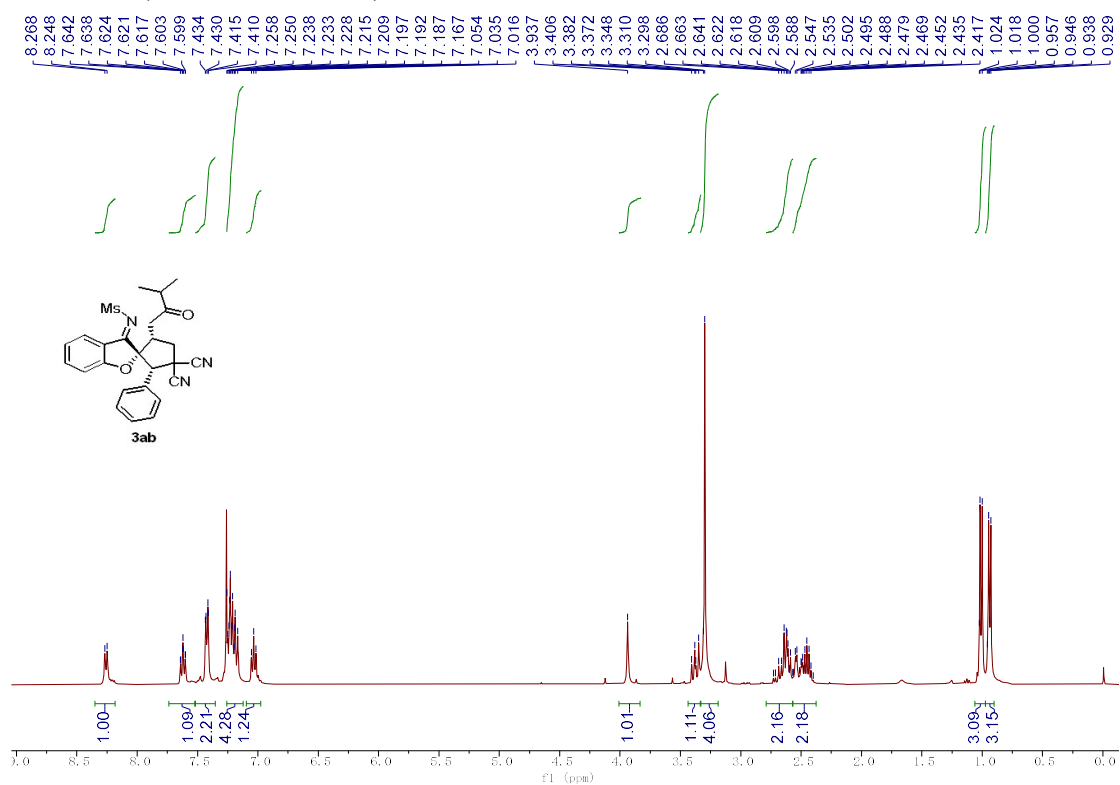

### <sup>13</sup>C NMR (100 MHz, CDCl<sub>3</sub>) of **3ab**

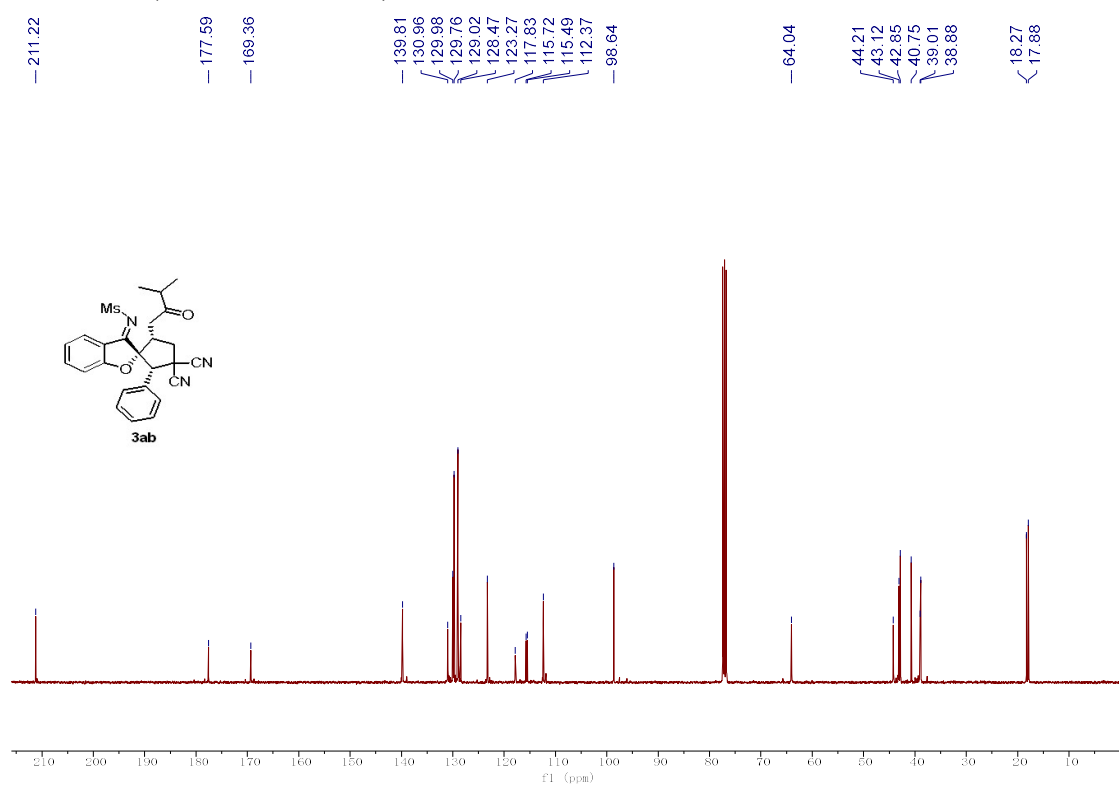

### $^1\text{H}$ NMR (400 MHz, $\text{CDCl}_3$ ) of **3ac**

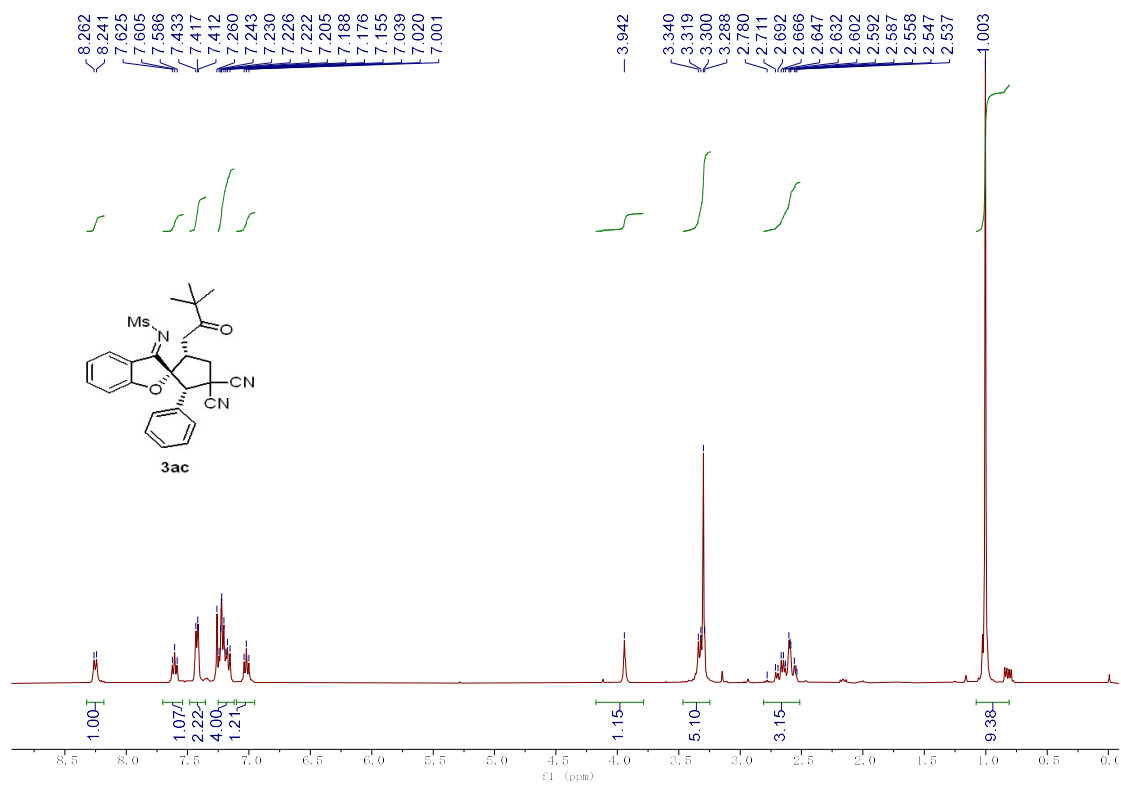

### $^{13}\text{C}$ NMR (100 MHz, $\text{CDCl}_3$ ) of **3ac**

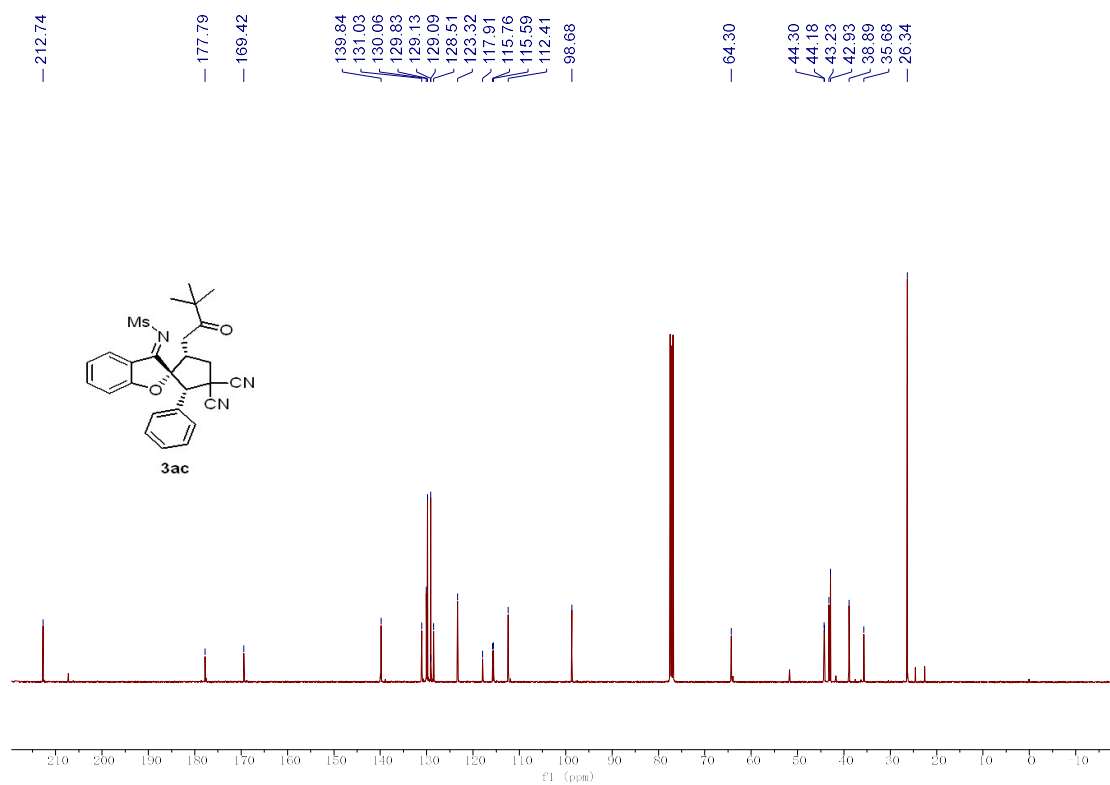

### <sup>1</sup>H NMR (400 MHz, CDCl<sub>3</sub>) of 3ad

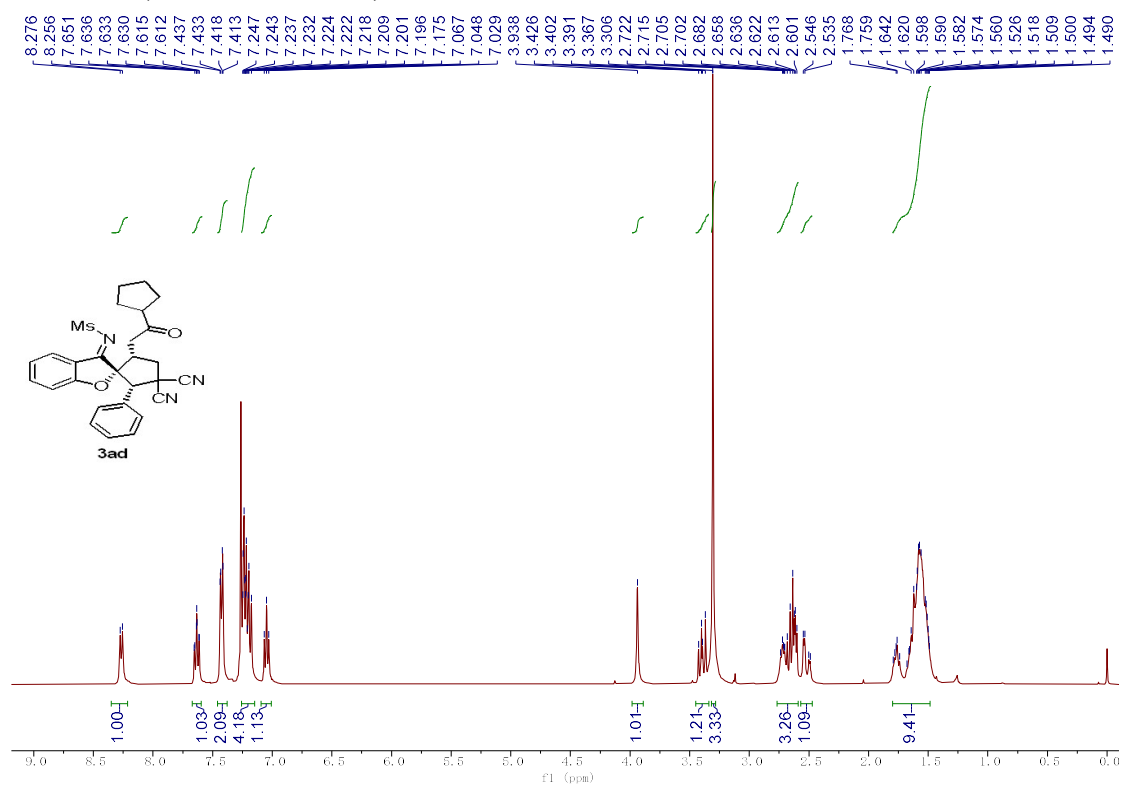

### <sup>13</sup>C NMR (100 MHz, CDCl<sub>3</sub>) of 3ad

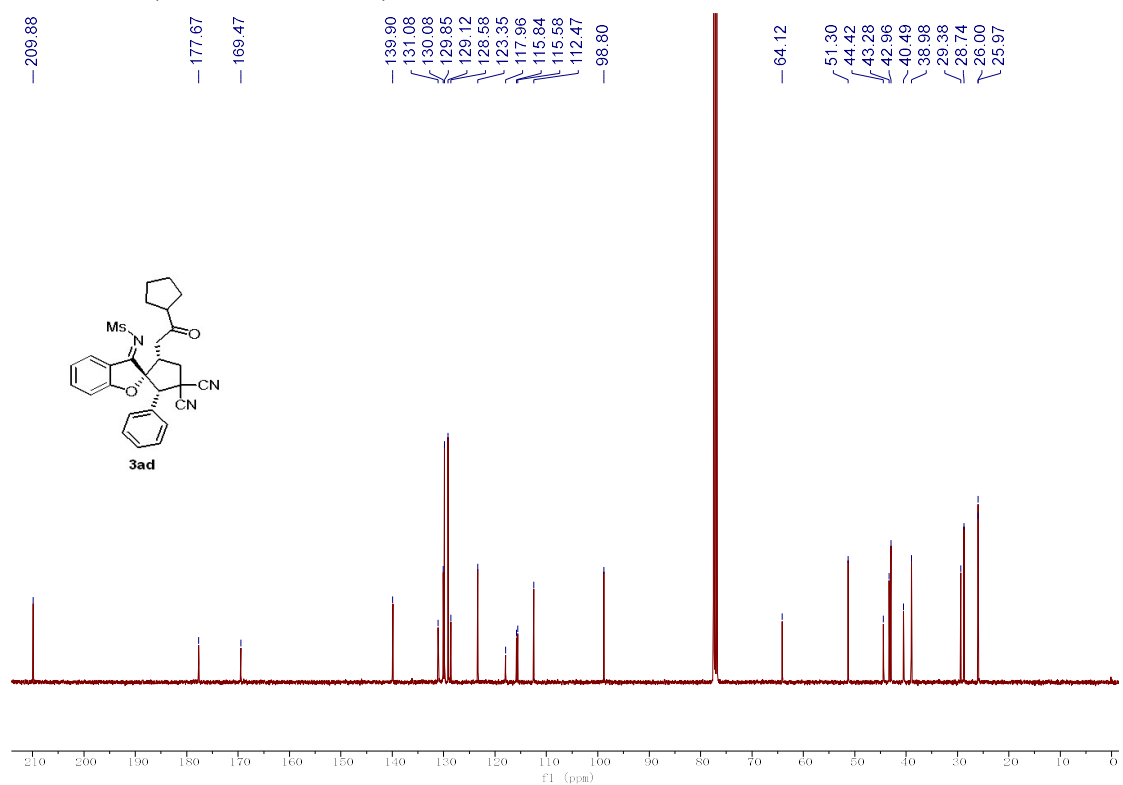

### $^1\text{H}$ NMR (400 MHz, $\text{CDCl}_3$ ) of **3ae**

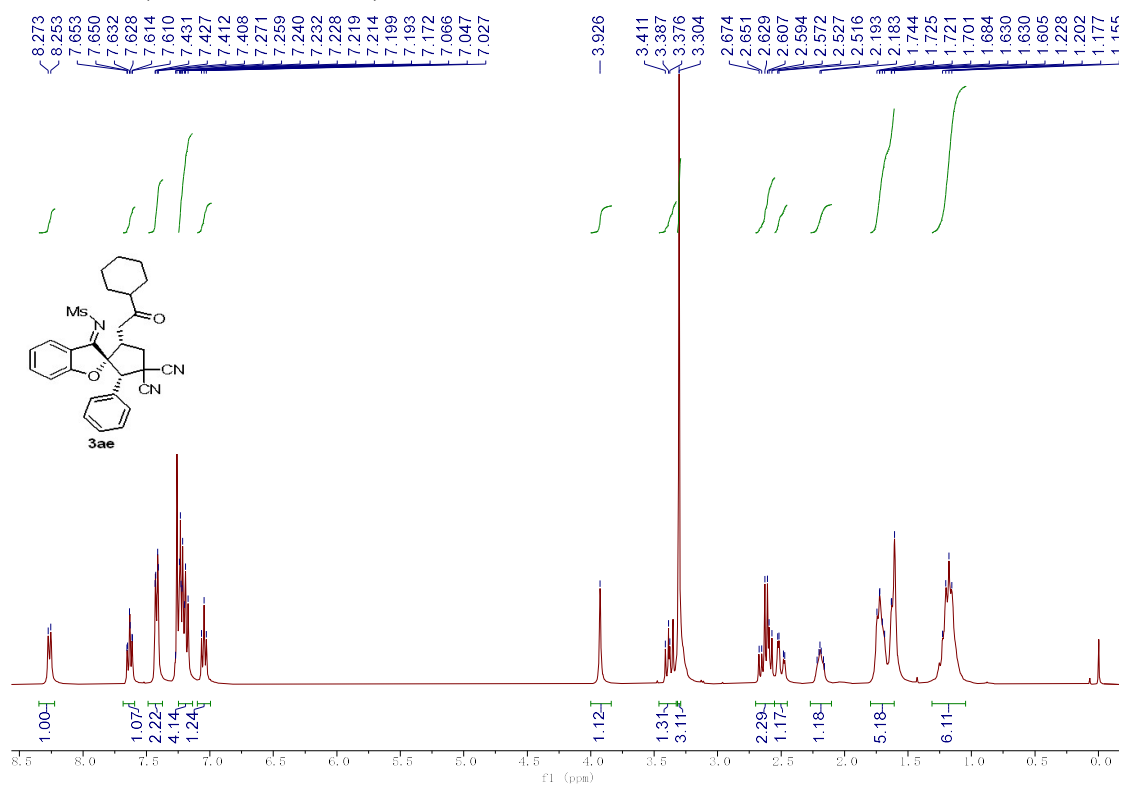

### $^{13}\text{C}$ NMR (100 MHz, $\text{CDCl}_3$ ) of **3ae**

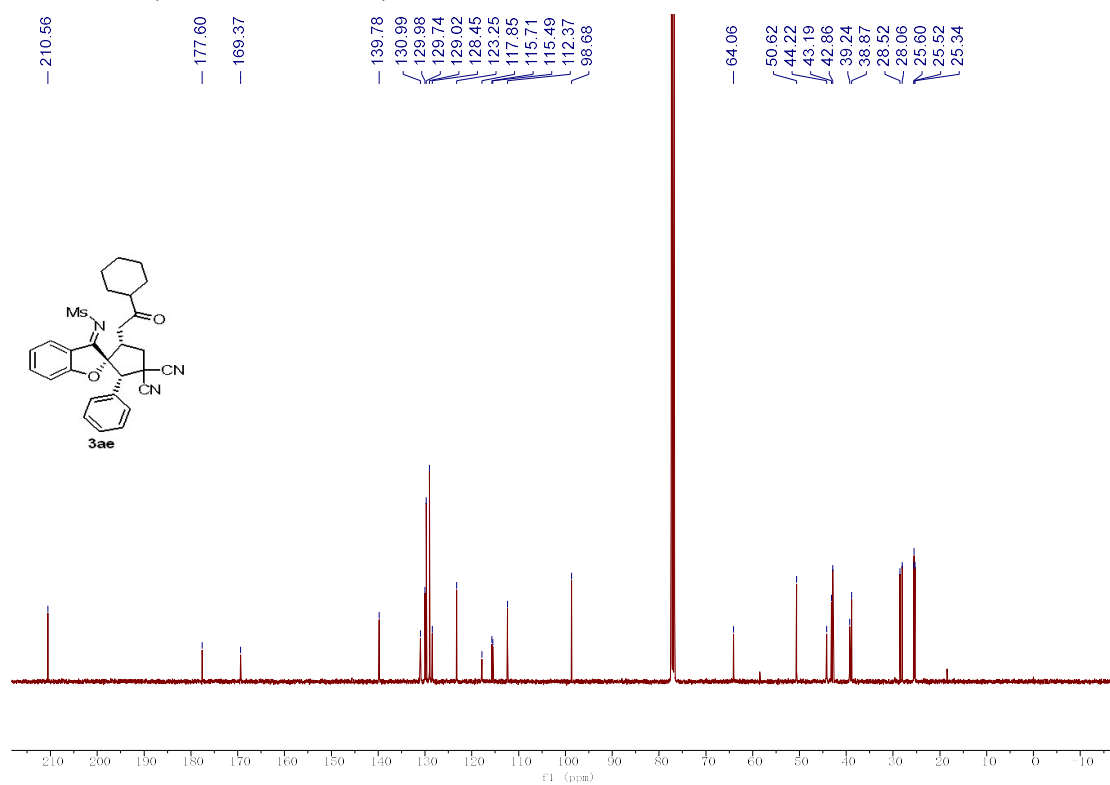

**<sup>1</sup>H NMR (400 MHz, CDCl<sub>3</sub>) of 3af**

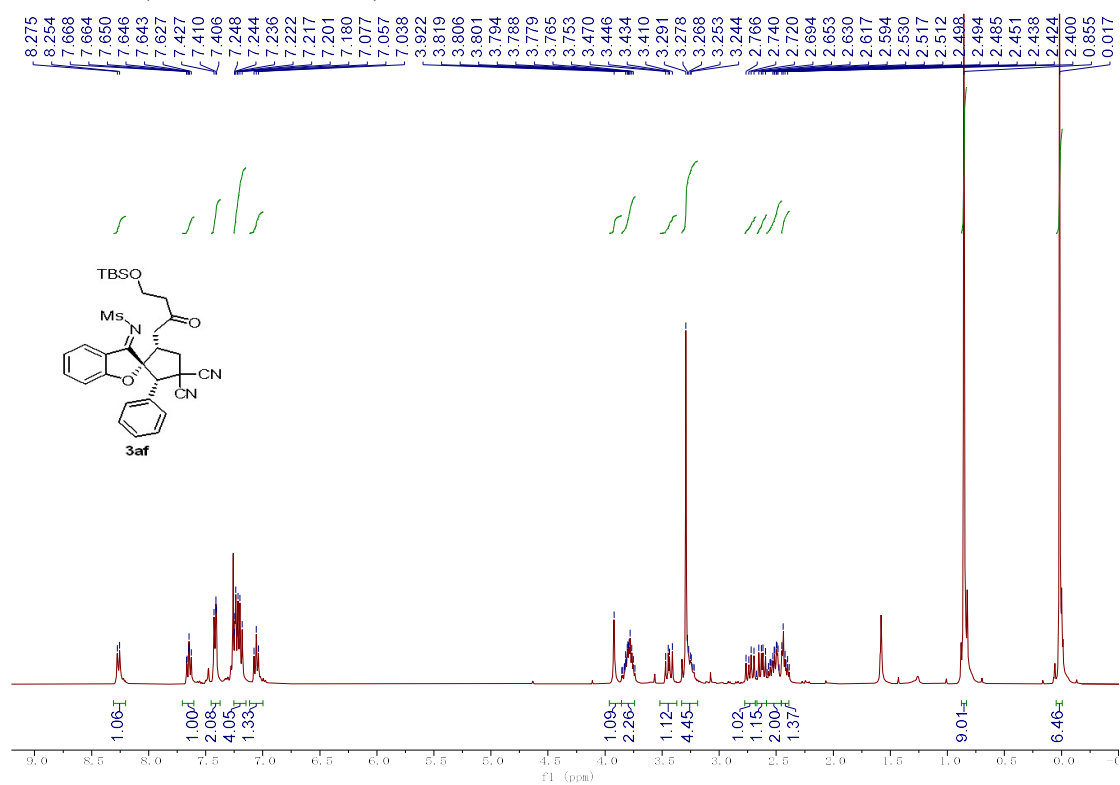

**<sup>13</sup>C NMR (100 MHz, CDCl<sub>3</sub>) of 3af**

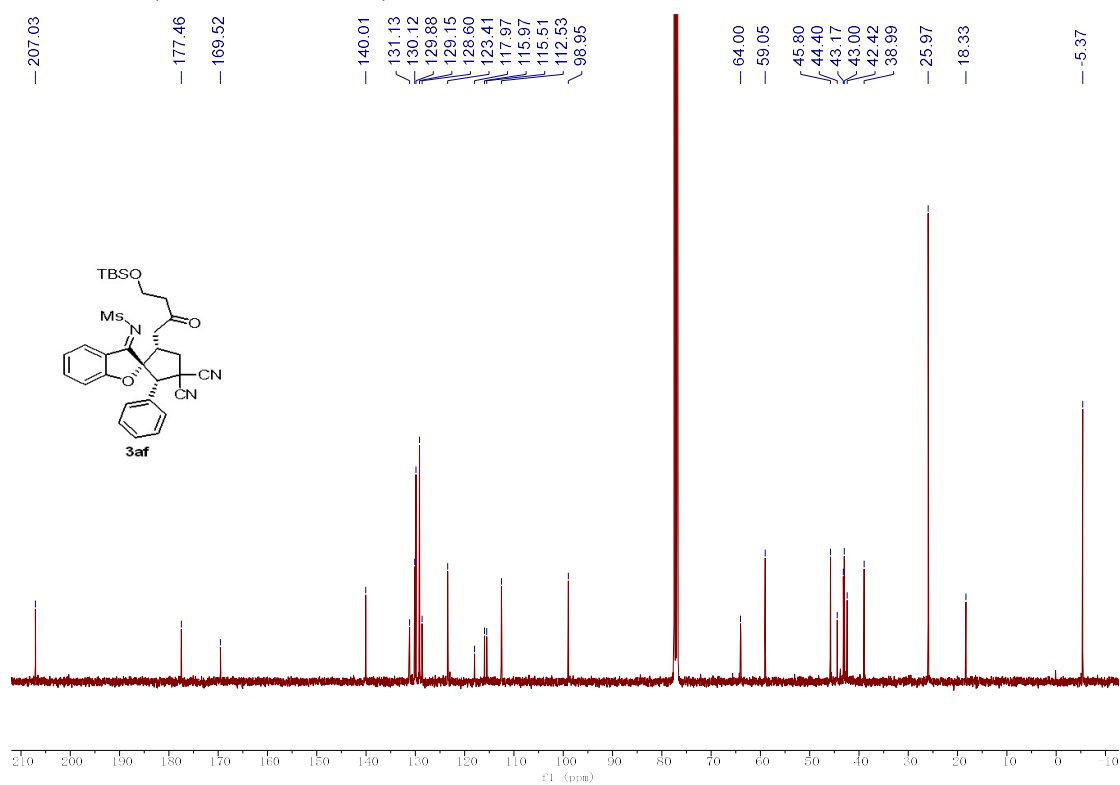



### $^1\text{H}$ NMR (400 MHz, $\text{CDCl}_3$ ) of **3ag**

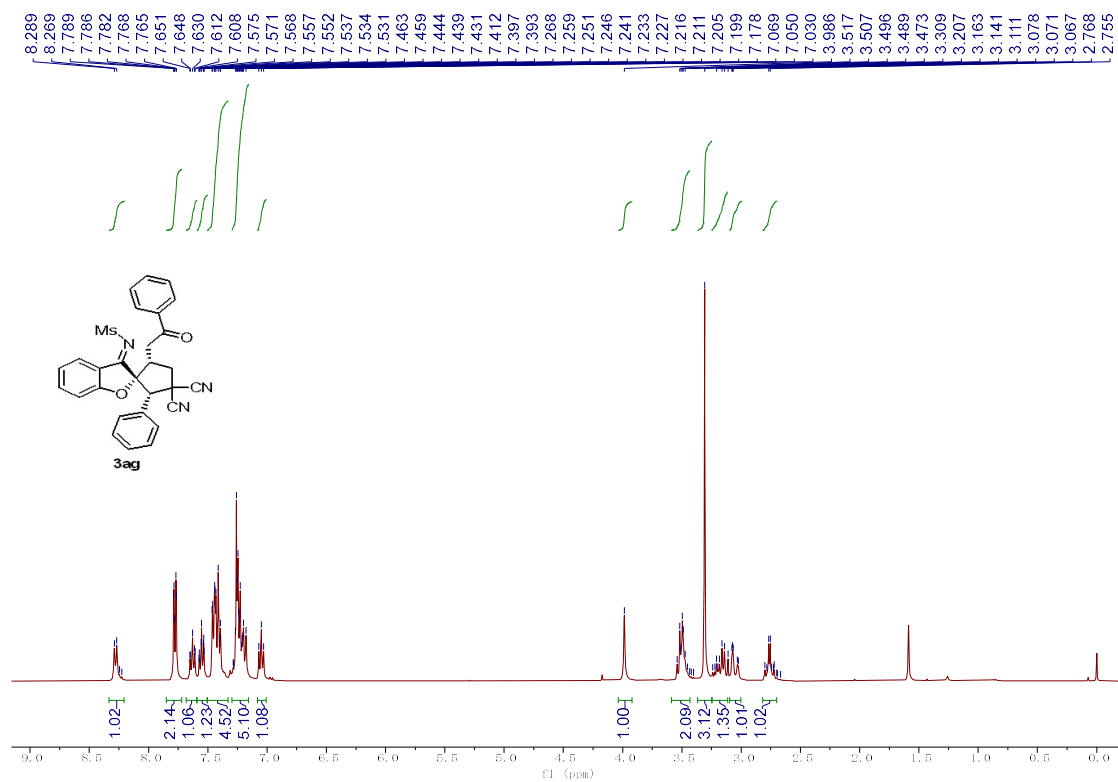

### $^{13}\text{C}$ NMR (100 MHz, $\text{CDCl}_3$ ) of **3ag**

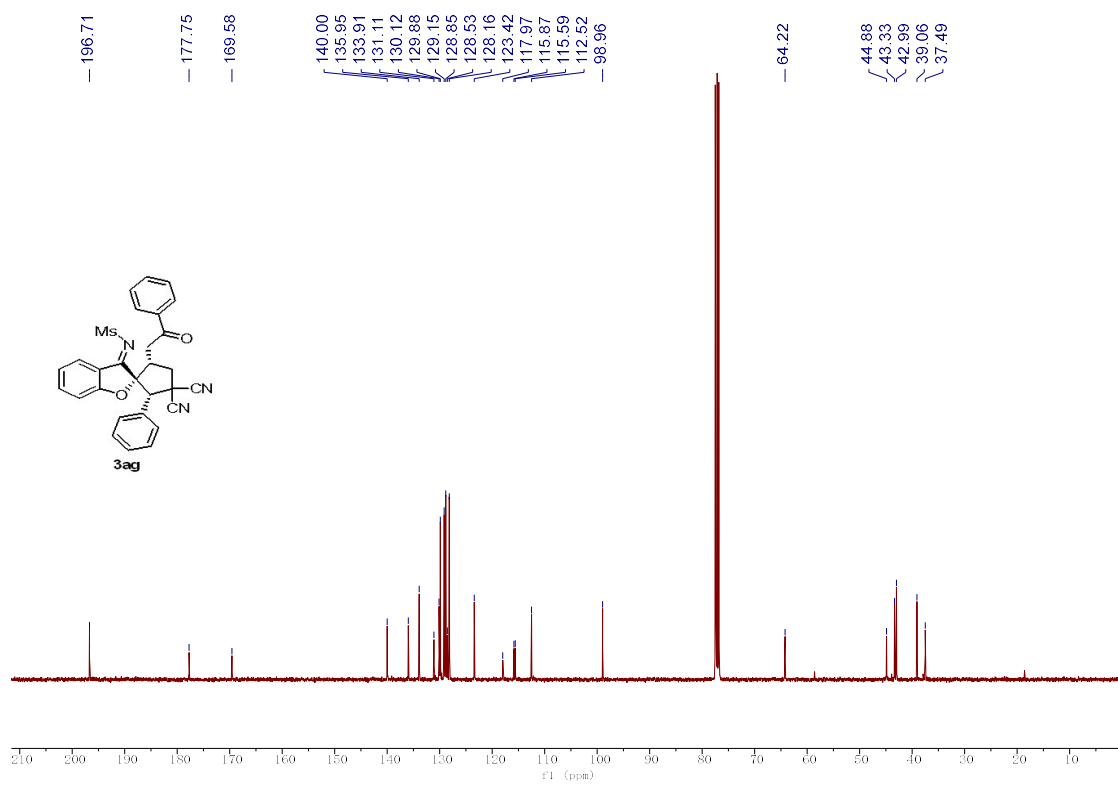

### $^1\text{H}$ NMR (400 MHz, $\text{CDCl}_3$ ) of **3ah**

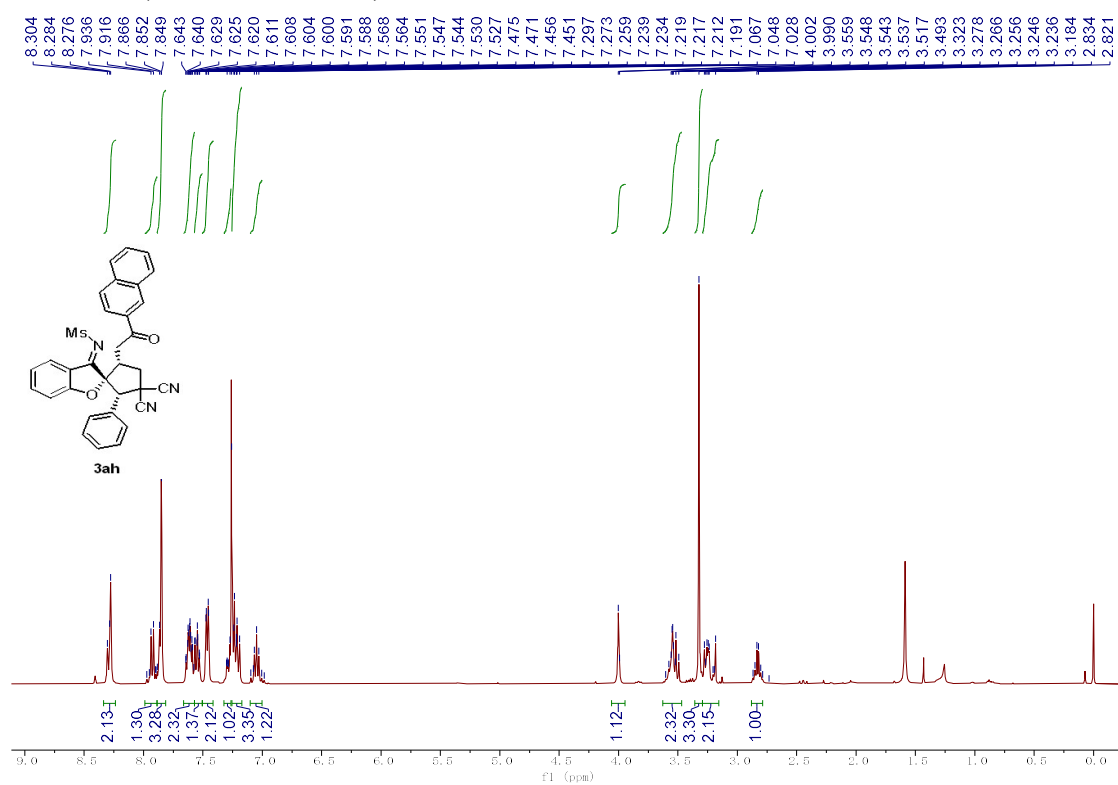

### $^{13}\text{C}$ NMR (100 MHz, $\text{CDCl}_3$ ) of **3ah**

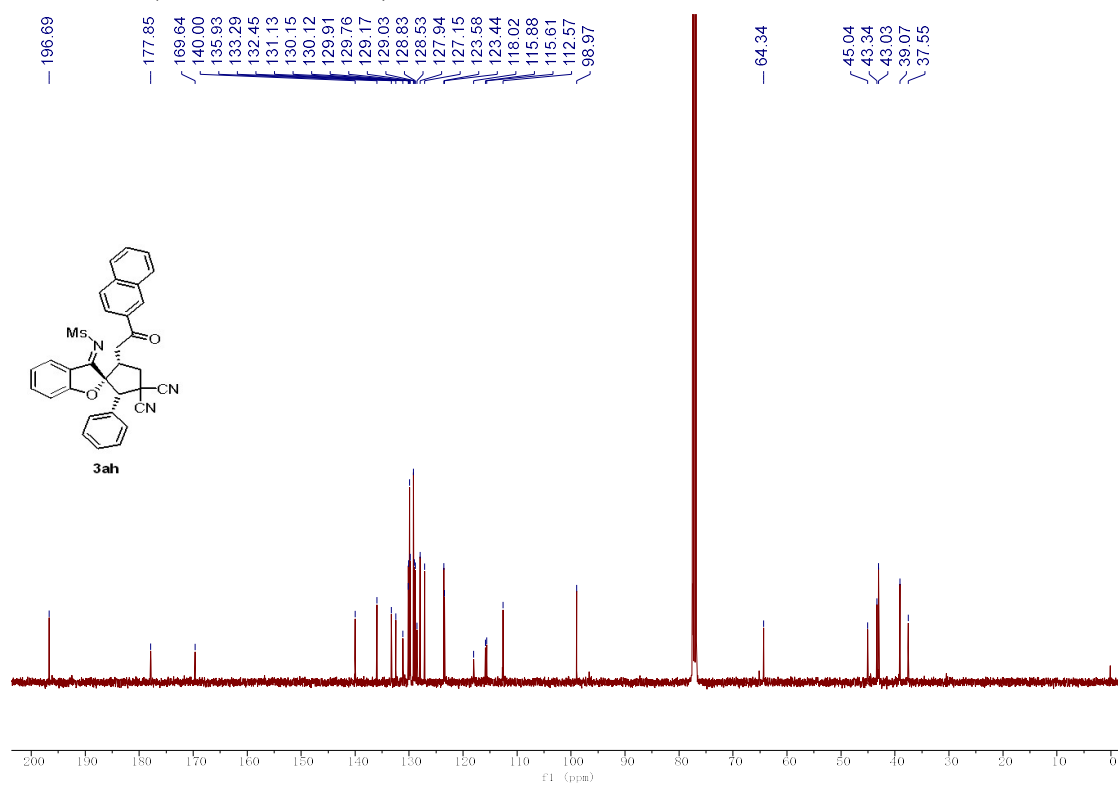

**<sup>1</sup>H NMR (400 MHz, CDCl<sub>3</sub>) of 5**

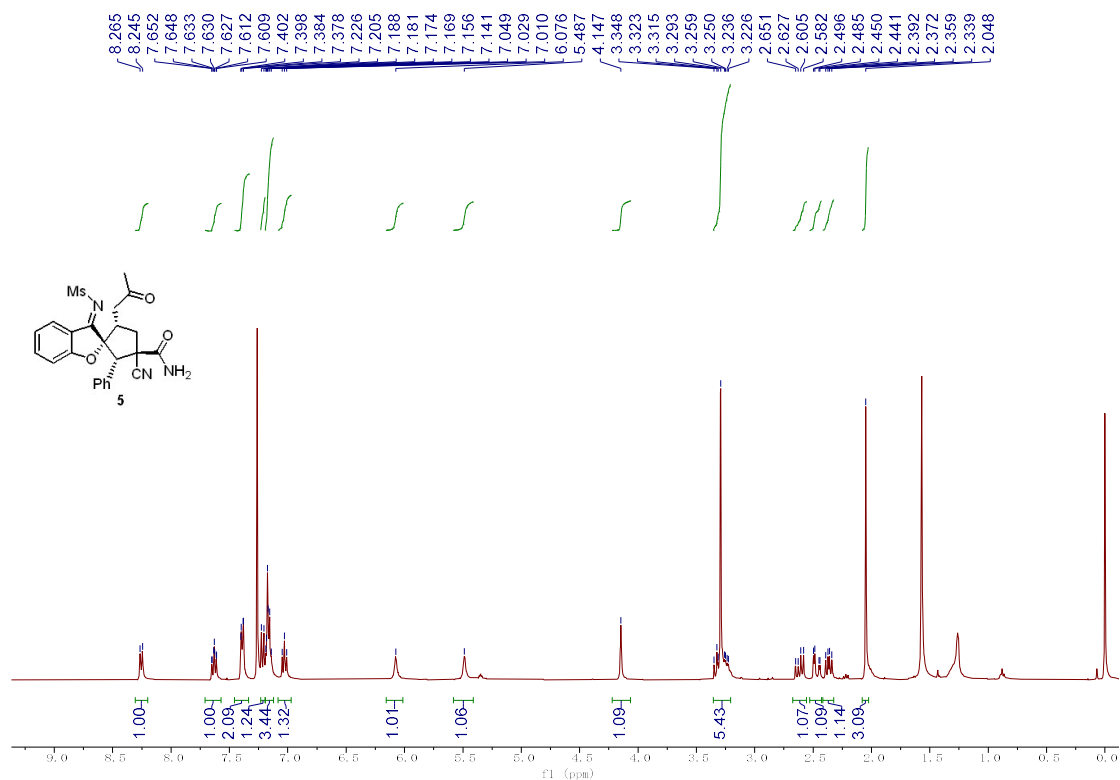

**<sup>13</sup>C NMR (100 MHz, CDCl<sub>3</sub>) of 5**

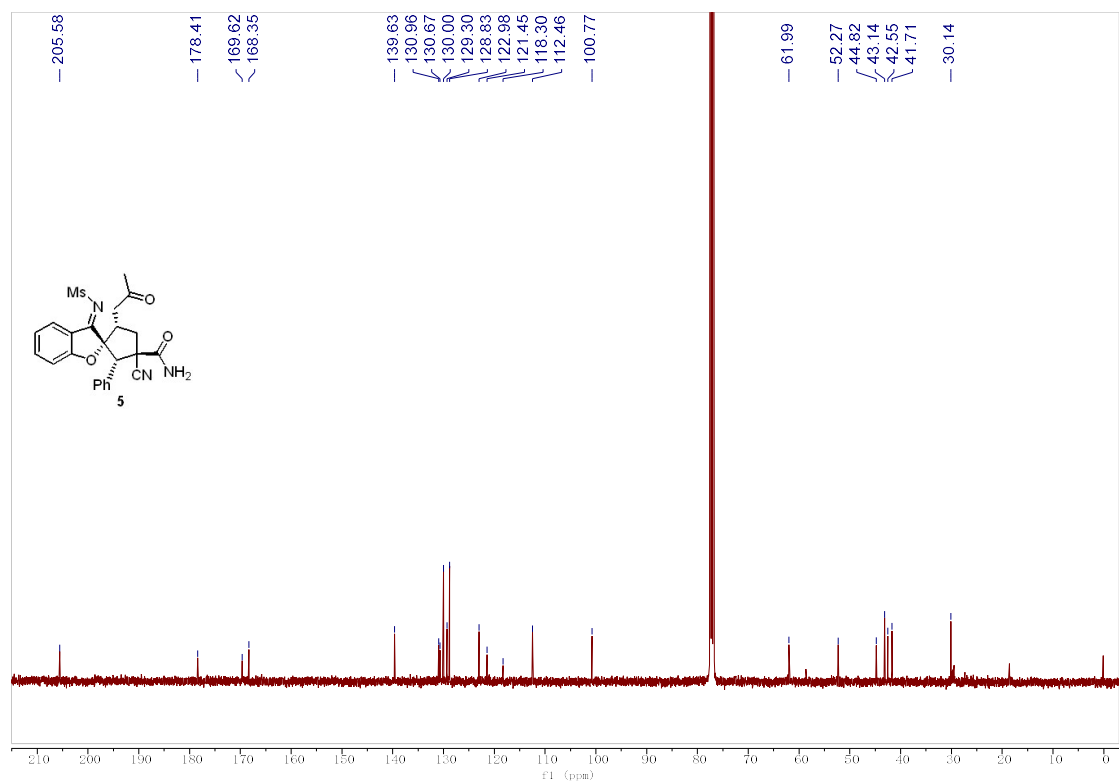

### $^1\text{H}$ NMR (400 MHz, $\text{CDCl}_3$ ) of **6**

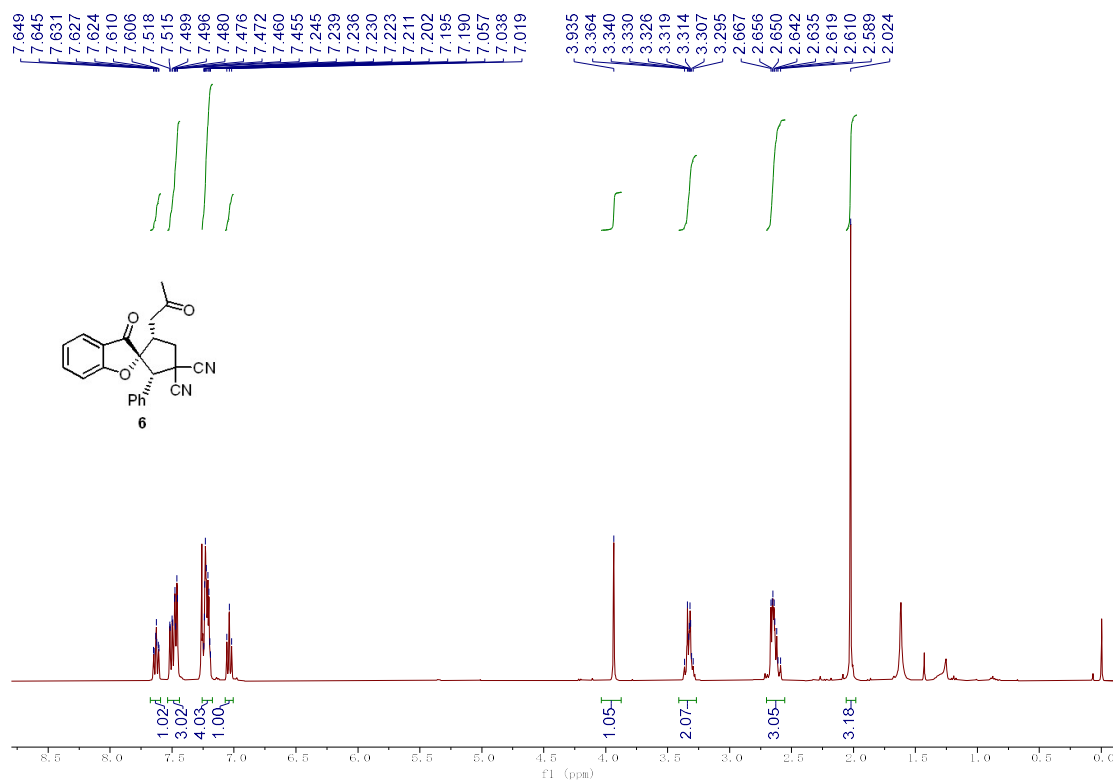

### $^{13}\text{C}$ NMR (100 MHz, $\text{CDCl}_3$ ) of **6**

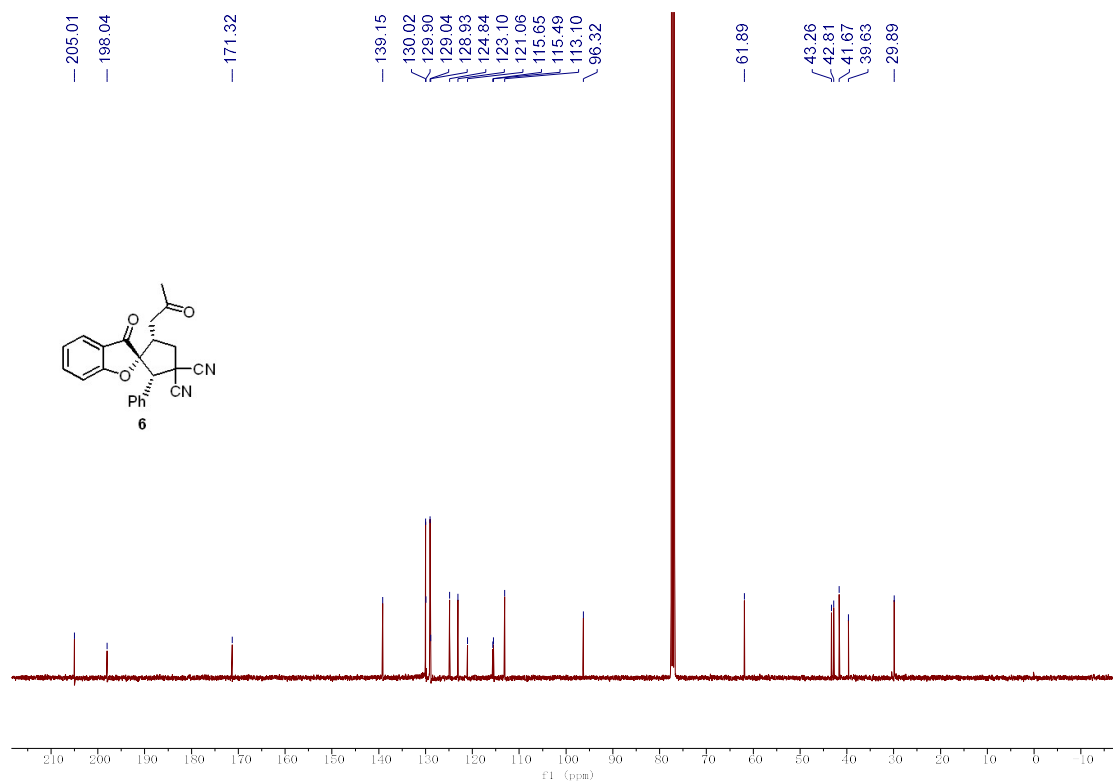

## 11. HPLC spectra of the products

### HPLC spectra of 3a

Conditions: Chiralpak IA, *n*-hexane/*i*-propanol = 90/10, flow rate = 1.0 mL/min, I = 280 nm, temp. = 25 °C.

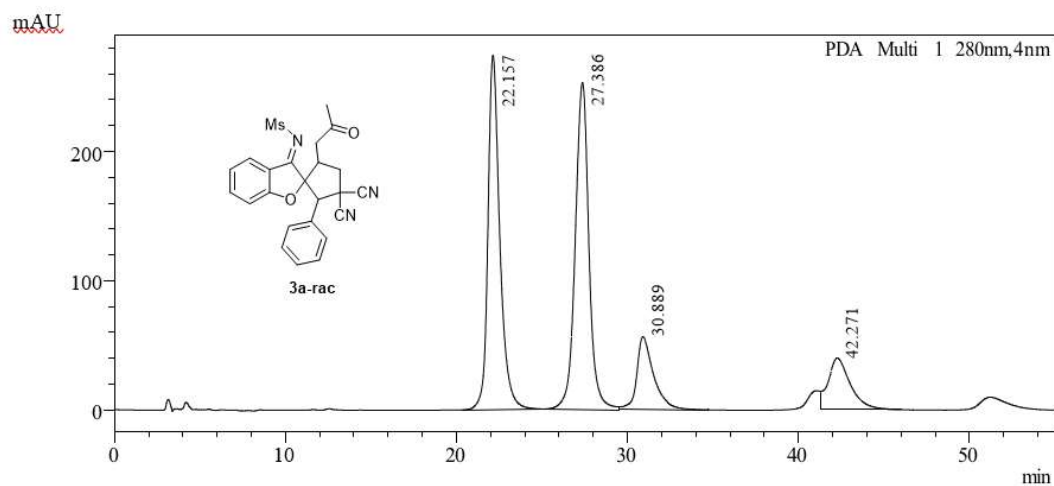

<PeakTable>

PDA Ch1 280nm

| Peak# | Ret Time | Area     | Height | Area%   |
|-------|----------|----------|--------|---------|
| 1     | 22.157   | 13268224 | 274331 | 38.531  |
| 2     | 27.386   | 13809538 | 252745 | 40.103  |
| 3     | 30.889   | 3802167  | 56536  | 11.042  |
| 4     | 42.271   | 3554972  | 39693  | 10.324  |
| Total |          | 34434903 | 623305 | 100.000 |

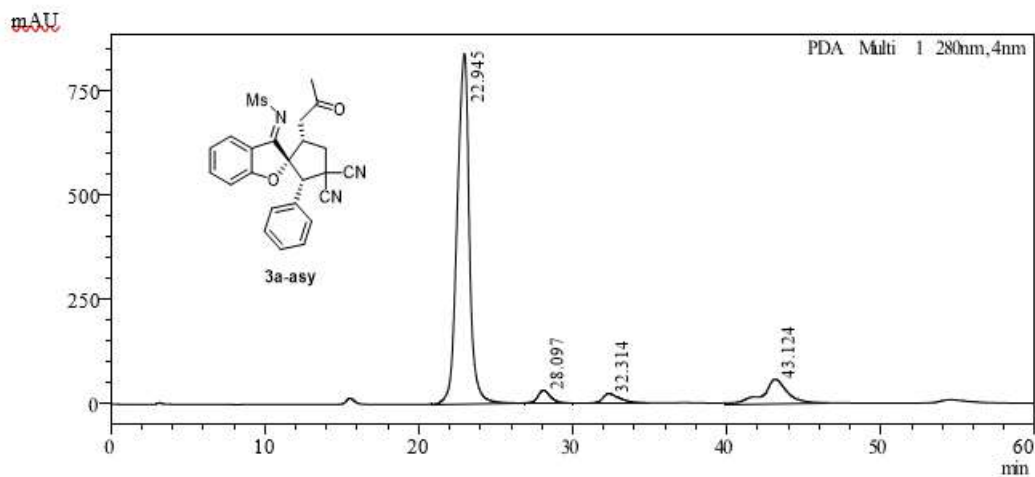

<PeakTable>

PDA Ch1 280nm

| Peak# | Ret Time | Area     | Height | Area%   |
|-------|----------|----------|--------|---------|
| 1     | 22.945   | 45050094 | 839037 | 81.586  |
| 2     | 28.097   | 2071284  | 34057  | 3.751   |
| 3     | 32.314   | 1822234  | 25026  | 3.300   |
| 4     | 43.124   | 6274588  | 58772  | 11.363  |
| Total |          | 55218200 | 956892 | 100.000 |

### HPLC spectra of 3a`

Conditions: Chiralpak IA, *n*-hexane/*i*-propanol = 90/10, flow rate = 1.0 mL/min, I = 280 nm, temp. = 25 °C

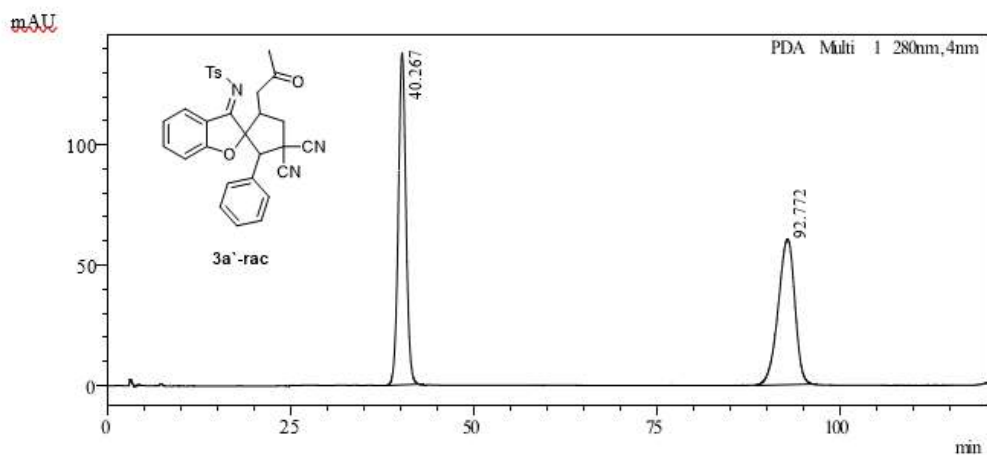

<PeakTable>

PDA Ch1 280nm

| Peak# | Ret.Time | Area     | Height | Area%   |
|-------|----------|----------|--------|---------|
| 1     | 40.267   | 9776111  | 137802 | 49.977  |
| 2     | 92.772   | 9785060  | 60503  | 50.023  |
| Total |          | 19561171 | 198305 | 100.000 |

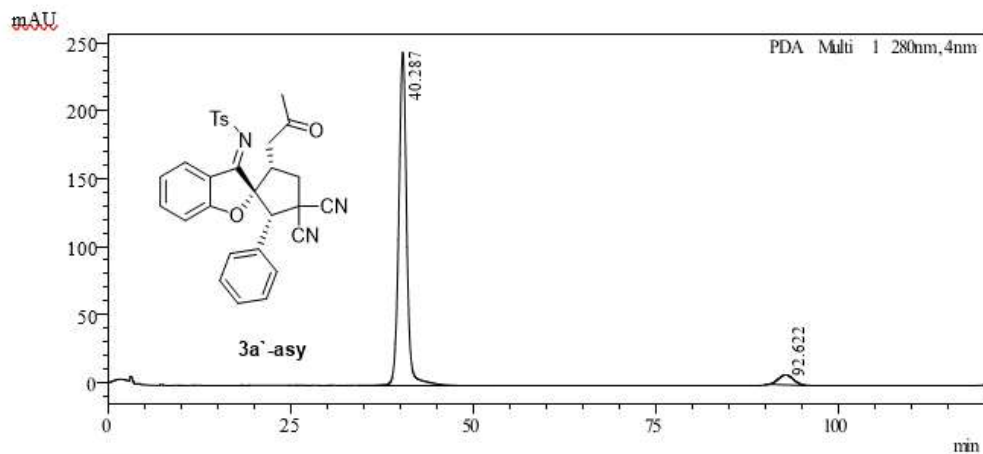

<PeakTable>

PDA Ch1 280nm

| Peak# | Ret.Time | Area     | Height | Area%   |
|-------|----------|----------|--------|---------|
| 1     | 40.287   | 18443531 | 244411 | 94.757  |
| 2     | 92.622   | 1020566  | 6942   | 5.243   |
| Total |          | 19464097 | 251353 | 100.000 |

## HPLC spectra of 3b

Conditions: Chiralpak IA, *n*-hexane/*i*-propanol = 90/10, flow rate = 1.0 mL/min, I = 280 nm, temp. = 25 °C.

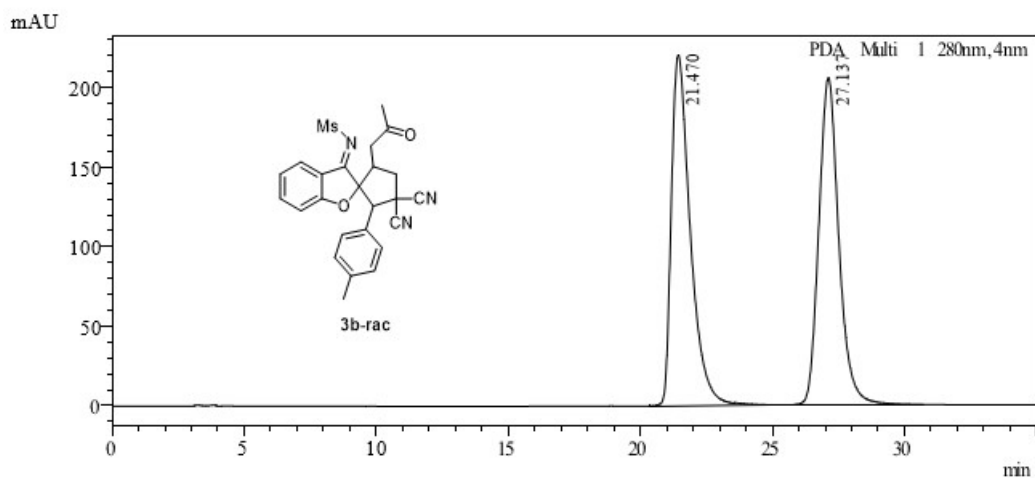

<PeakTable>

PDA Ch1 280nm

| Peak# | Ret.Time | Area     | Height | Area%   |
|-------|----------|----------|--------|---------|
| 1     | 21.470   | 10918753 | 219964 | 50.153  |
| 2     | 27.137   | 10852081 | 205488 | 49.847  |
| Total |          | 21770833 | 425452 | 100.000 |

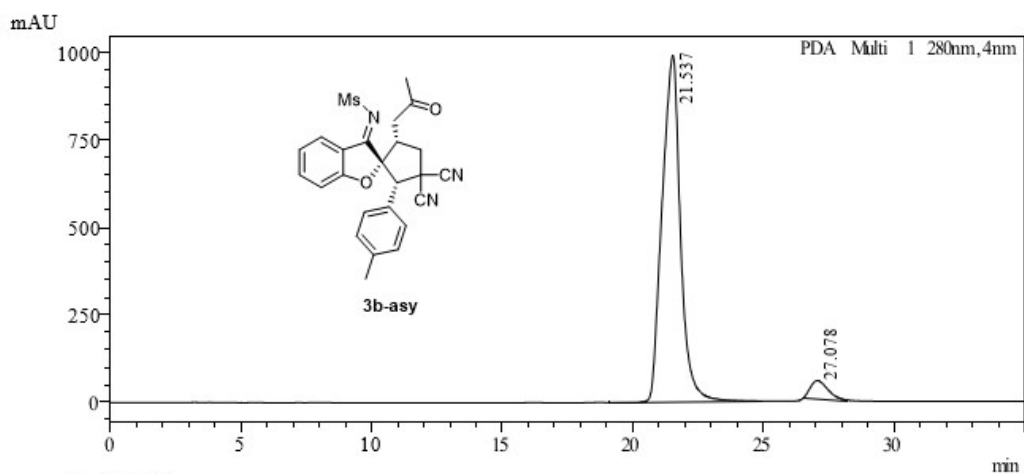

<PeakTable>

PDA Ch1 280nm

| Peak# | Ret.Time | Area     | Height  | Area%   |
|-------|----------|----------|---------|---------|
| 1     | 21.537   | 48235934 | 990894  | 95.123  |
| 2     | 27.078   | 2472878  | 54198   | 4.877   |
| Total |          | 50708812 | 1045092 | 100.000 |

## HPLC spectra of 3c

Conditions: Chiralpak IA, *n*-hexane/*i*-propanol = 90/10, flow rate = 1.0 mL/min, I = 280 nm, temp. = 25 °C.

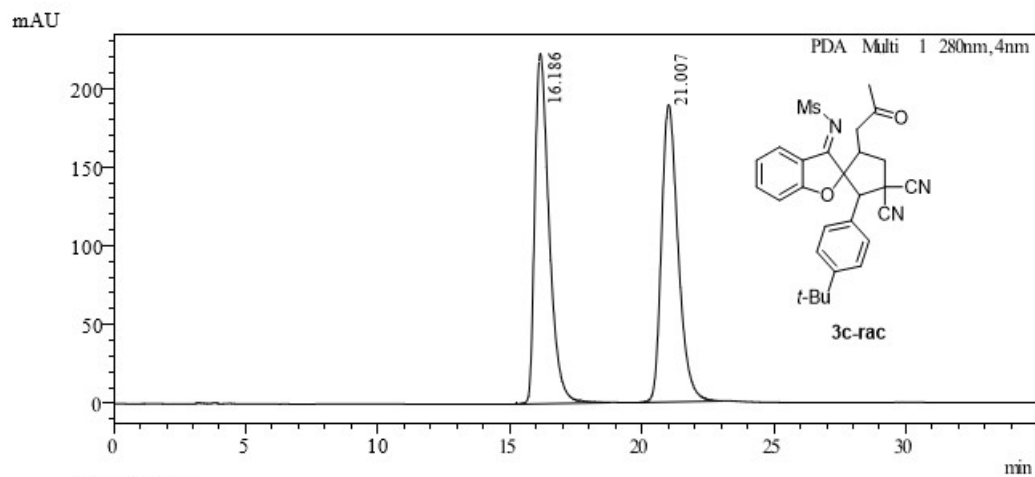

<PeakTable>

PDA Ch1 280nm

| Peak# | Ret. Time | Area     | Height | Area%   |
|-------|-----------|----------|--------|---------|
| 1     | 16.186    | 8354249  | 221836 | 50.359  |
| 2     | 21.007    | 8235139  | 188780 | 49.641  |
| Total |           | 16589388 | 410616 | 100.000 |

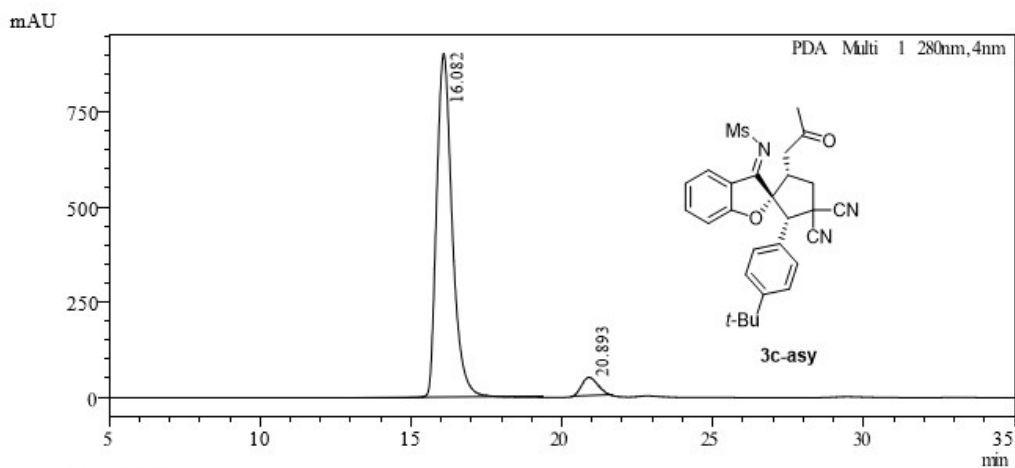

<PeakTable>

PDA Ch1 280nm

| Peak# | Ret. Time | Area     | Height | Area%   |
|-------|-----------|----------|--------|---------|
| 1     | 16.082    | 32520993 | 902371 | 94.805  |
| 2     | 20.893    | 1782043  | 46595  | 5.195   |
| Total |           | 34303035 | 948966 | 100.000 |



## HPLC spectra of 3d

Conditions: Chiralpak IA, *n*-hexane/*i*-propanol = 90/10, flow rate = 1.0 mL/min, I = 254 nm, temp. = 25 °C.

mAU

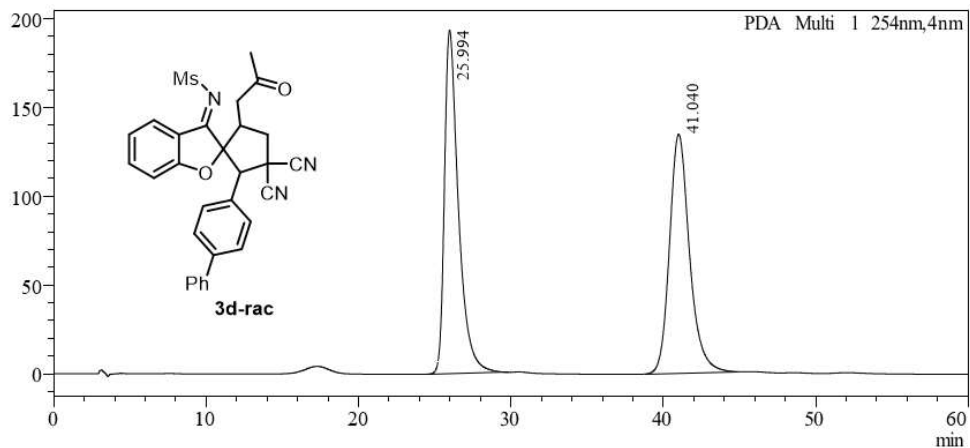

<Peak Table>

PDA Ch1 254nm

| Peak# | Ret. Time | Area     | Height | Area%   |
|-------|-----------|----------|--------|---------|
| 1     | 25.994    | 12278659 | 193426 | 50.263  |
| 2     | 41.040    | 12150081 | 134872 | 49.737  |
| Total |           | 24428741 | 328298 | 100.000 |

mAU

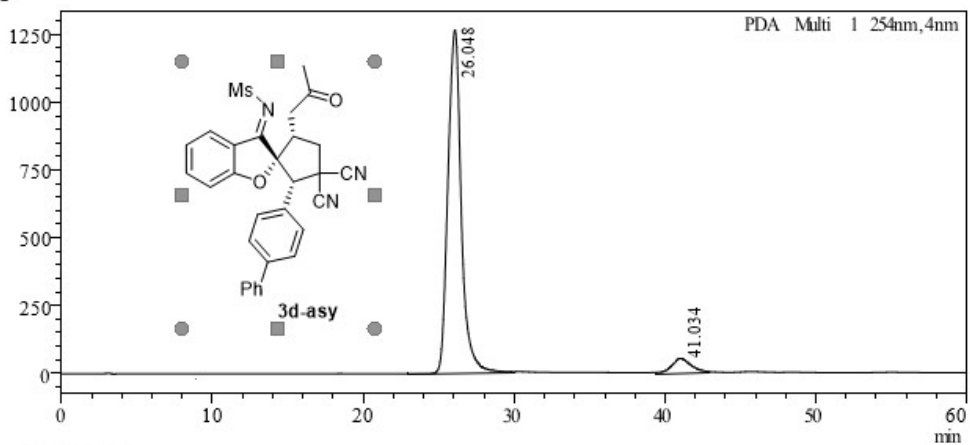

<PeakTable>

PDA Ch1 254nm

| Peak# | Ret. Time | Area     | Height  | Area%   |
|-------|-----------|----------|---------|---------|
| 1     | 26.048    | 77260825 | 1263136 | 94.899  |
| 2     | 41.034    | 4152533  | 49434   | 5.101   |
| Total |           | 81413358 | 1312571 | 100.000 |

## HPLC spectra of 3e

Conditions: Chiralpak IA, *n*-hexane/*i*-propanol = 90/10, flow rate = 1.0 mL/min, I = 280 nm, temp. = 25 °C.

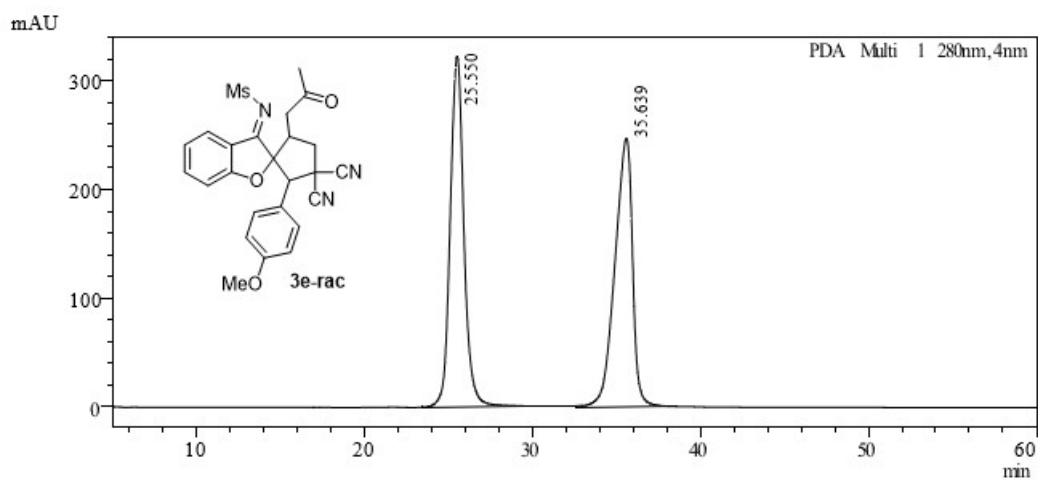

<PeakTable>

PDA Ch1 280nm

| Peak# | Ret.Time | Area     | Height | Area%   |
|-------|----------|----------|--------|---------|
| 1     | 25.550   | 18241751 | 322165 | 50.270  |
| 2     | 35.639   | 18045735 | 246093 | 49.730  |
| Total |          | 36287486 | 568258 | 100.000 |

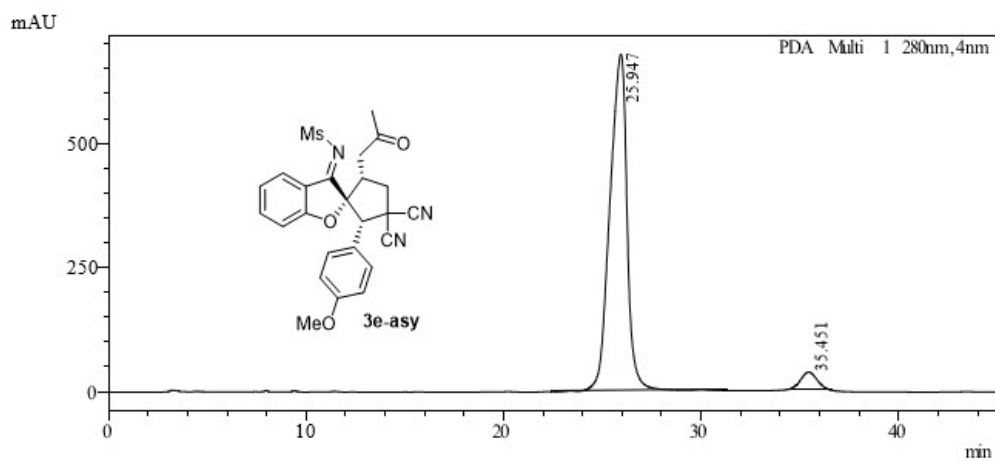

<PeakTable>

PDA Ch1 280nm

| Peak# | Ret.Time | Area     | Height | Area%   |
|-------|----------|----------|--------|---------|
| 1     | 25.947   | 40547119 | 676116 | 95.089  |
| 2     | 35.451   | 2094194  | 35613  | 4.911   |
| Total |          | 42641314 | 711729 | 100.000 |

## HPLC spectra of 3f

Conditions: Chiralpak IA, *n*-hexane/*i*-propanol = 90/10, flow rate = 1.0 mL/min, I = 280 nm, temp. = 25 °C.

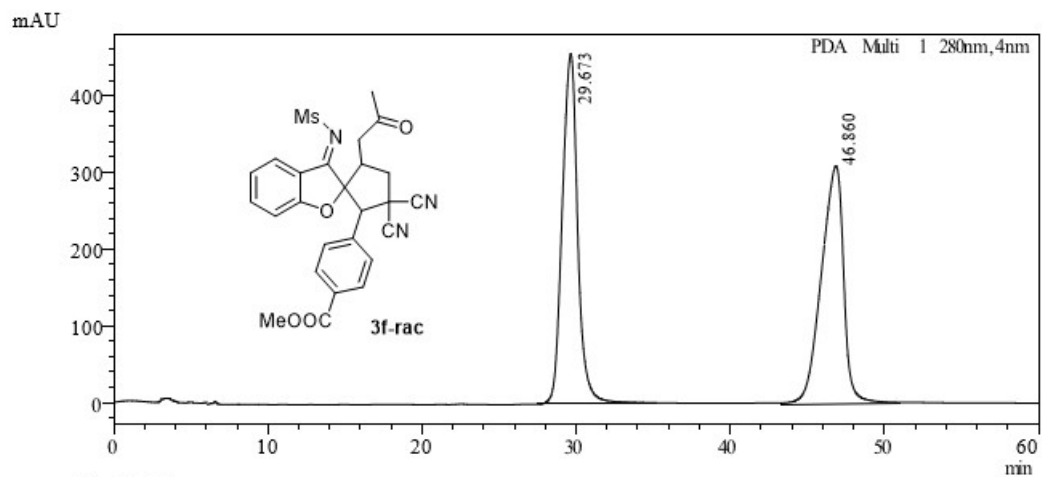

<PeakTable>

PDA Ch1 280nm

| Peak# | Ret.Time | Area     | Height | Area%   |
|-------|----------|----------|--------|---------|
| 1     | 29.673   | 31843801 | 455503 | 50.187  |
| 2     | 46.860   | 31605894 | 309558 | 49.813  |
| Total |          | 63449695 | 765061 | 100.000 |

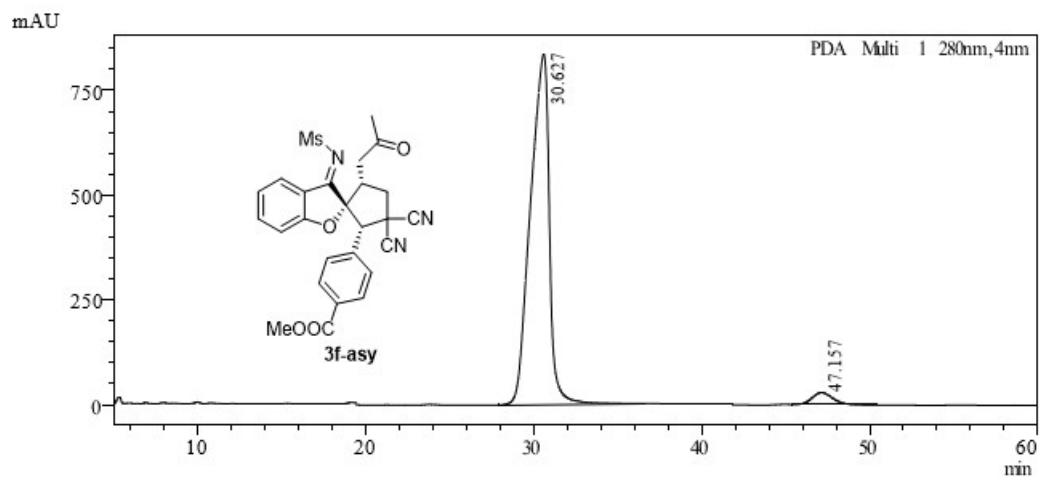

<PeakTable>

PDA Ch1 280nm

| Peak# | Ret.Time | Area     | Height | Area%   |
|-------|----------|----------|--------|---------|
| 1     | 30.627   | 65162857 | 834343 | 96.133  |
| 2     | 47.157   | 2621507  | 28654  | 3.867   |
| Total |          | 67784363 | 862997 | 100.000 |

## HPLC spectra of 3g

Conditions: Chiralpak IA, *n*-hexane/*i*-propanol = 90/10, flow rate = 1.0 mL/min, I = 280 nm, temp. = 25 °C.

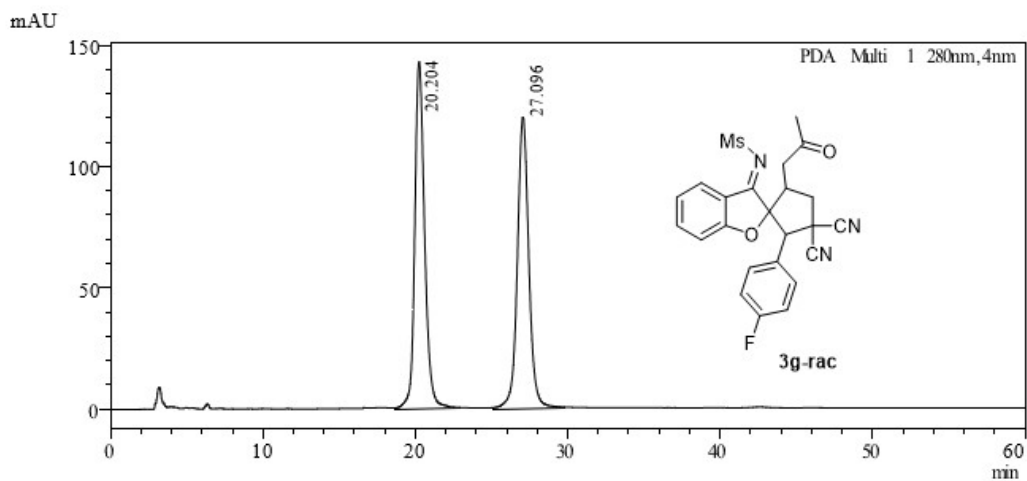

<PeakTable>  
PDA Ch1 280nm

| Peak# | Ret.Time | Area     | Height | Area%   |
|-------|----------|----------|--------|---------|
| 1     | 20.204   | 6355428  | 142498 | 50.473  |
| 2     | 27.096   | 6236395  | 119840 | 49.527  |
| Total |          | 12591823 | 262338 | 100.000 |

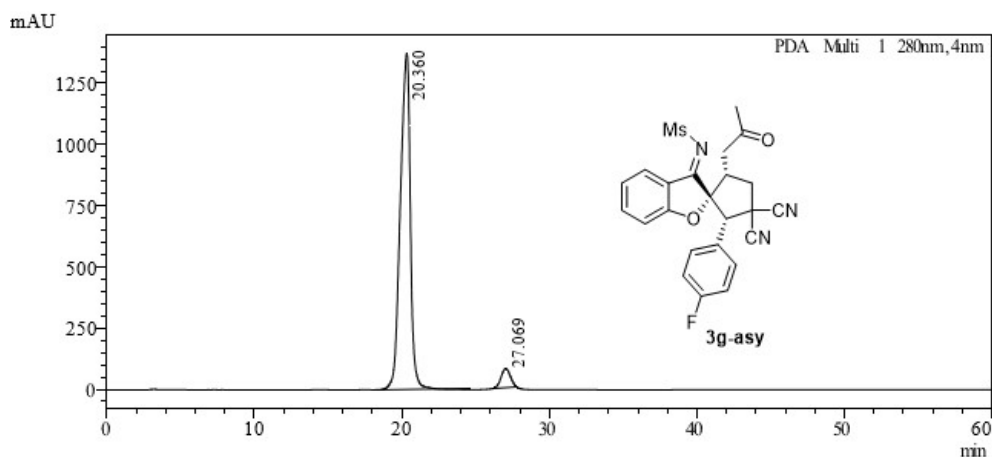

<PeakTable>  
PDA Ch1 280nm

| Peak# | Ret.Time | Area     | Height  | Area%   |
|-------|----------|----------|---------|---------|
| 1     | 20.360   | 64916580 | 1370211 | 95.136  |
| 2     | 27.069   | 3319204  | 76475   | 4.864   |
| Total |          | 68235784 | 1446686 | 100.000 |

## HPLC spectra of 3h

Conditions: Chiralpak IA, *n*-hexane/*i*-propanol = 90/10, flow rate = 1.0 mL/min, I = 280 nm, temp. = 25 °C.

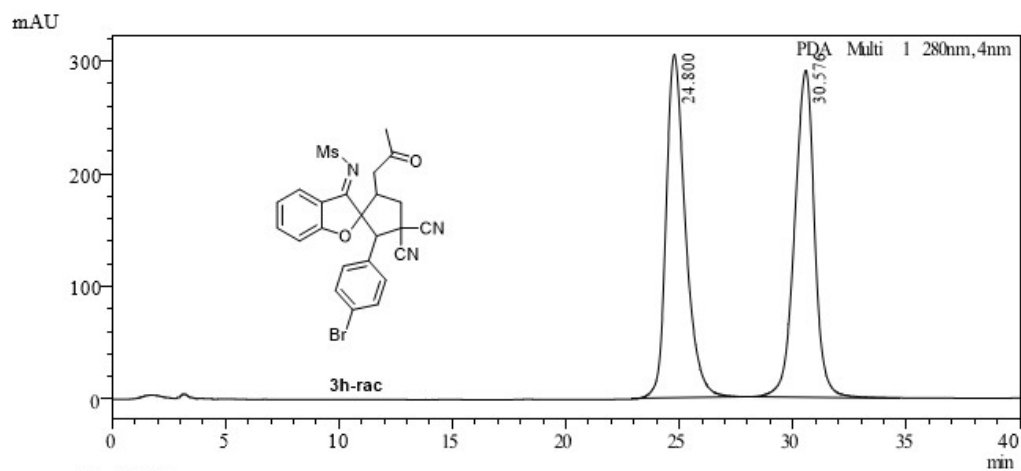

<PeakTable>

PDA Ch1 280nm

| Peak# | Ret. Time | Area     | Height | Area%   |
|-------|-----------|----------|--------|---------|
| 1     | 24.800    | 17958550 | 304816 | 50.398  |
| 2     | 30.576    | 17675234 | 290718 | 49.602  |
| Total |           | 35633784 | 595534 | 100.000 |

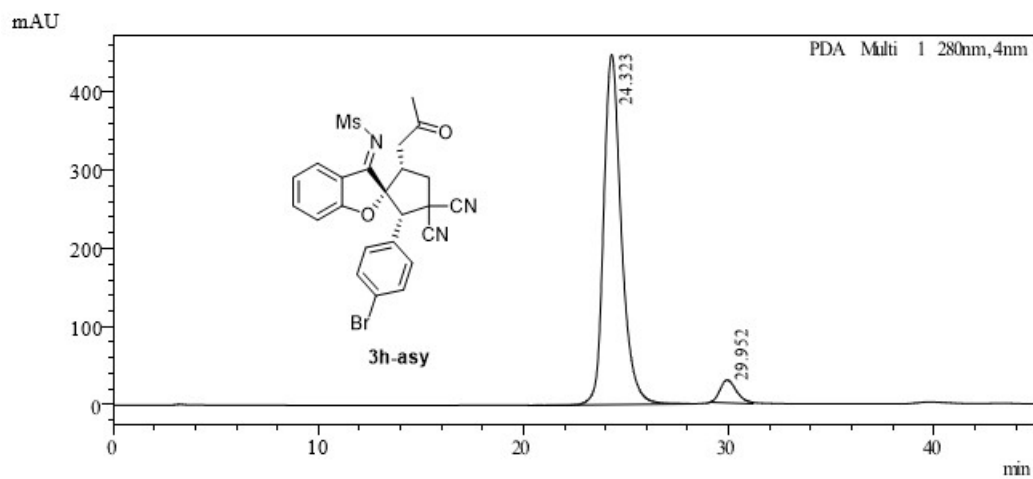

<PeakTable>

PDA Ch1 280nm

| Peak# | Ret. Time | Area     | Height | Area%   |
|-------|-----------|----------|--------|---------|
| 1     | 24.323    | 26206854 | 447282 | 94.558  |
| 2     | 29.952    | 1508125  | 28403  | 5.442   |
| Total |           | 27714979 | 475685 | 100.000 |

## HPLC spectra of **3i**

Conditions: Chiralpak IA, *n*-hexane/*i*-propanol = 90/10, flow rate = 1.0 mL/min, I = 280 nm, temp. = 25 °C.

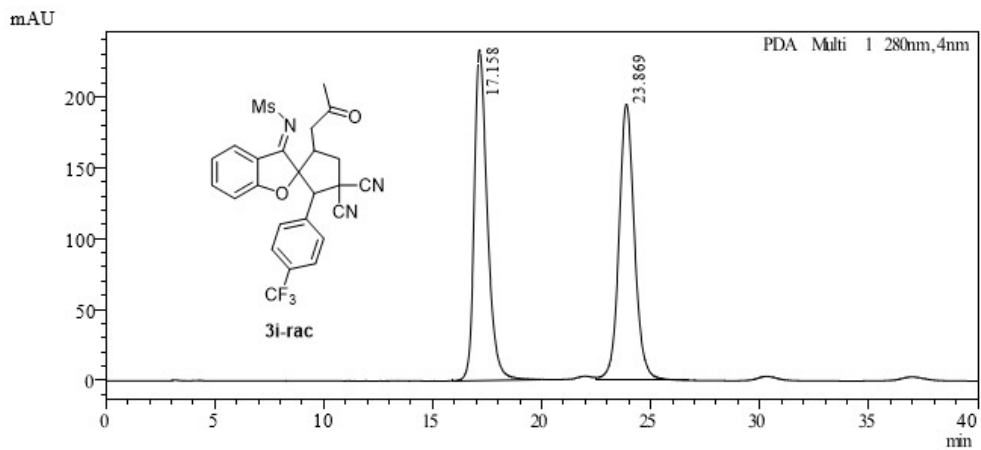

<PeakTable>

PDA Ch1 280nm

| Peak# | Ret.Time | Area     | Height | Area%   |
|-------|----------|----------|--------|---------|
| 1     | 17.158   | 9668952  | 232664 | 50.473  |
| 2     | 23.869   | 9487885  | 194537 | 49.527  |
| Total |          | 19156838 | 427201 | 100.000 |

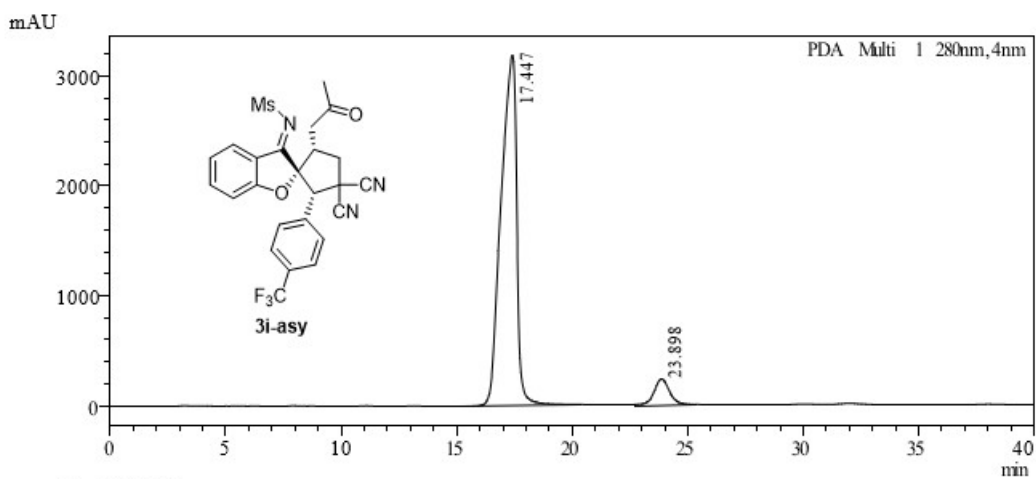

<PeakTable>

PDA Ch1 280nm

| Peak# | Ret.Time | Area      | Height  | Area%   |
|-------|----------|-----------|---------|---------|
| 1     | 17.447   | 149834666 | 3181953 | 93.356  |
| 2     | 23.898   | 10663267  | 237349  | 6.644   |
| Total |          | 160497934 | 3419302 | 100.000 |

## HPLC spectra of 3j

Conditions: Chiralpak IA, *n*-hexane/*i*-propanol = 90/10, flow rate = 1.0 mL/min, I = 280 nm, temp. = 25 °C.

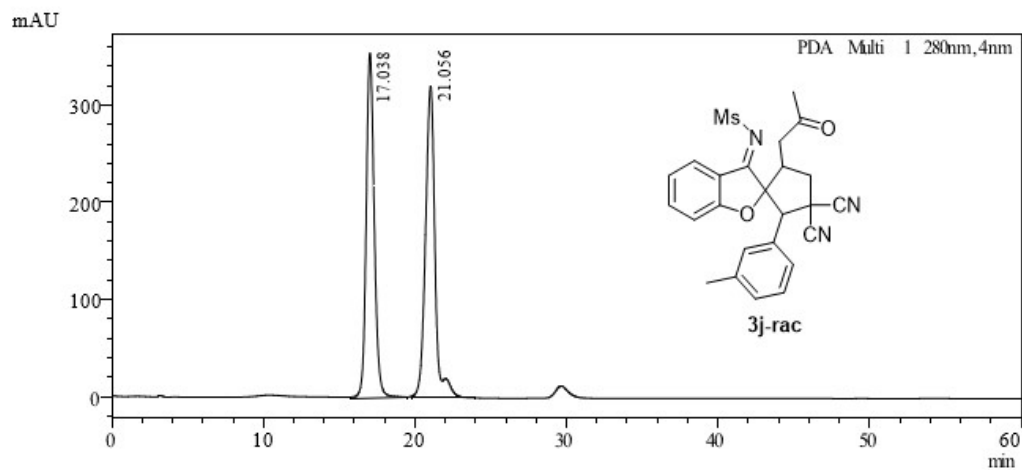

<PeakTable>

PDA Ch1 280nm

| Peak# | Ret. Time | Area     | Height | Area%   |
|-------|-----------|----------|--------|---------|
| 1     | 17.038    | 13100579 | 354234 | 48.580  |
| 2     | 21.056    | 13866598 | 321589 | 51.420  |
| Total |           | 26967177 | 675824 | 100.000 |

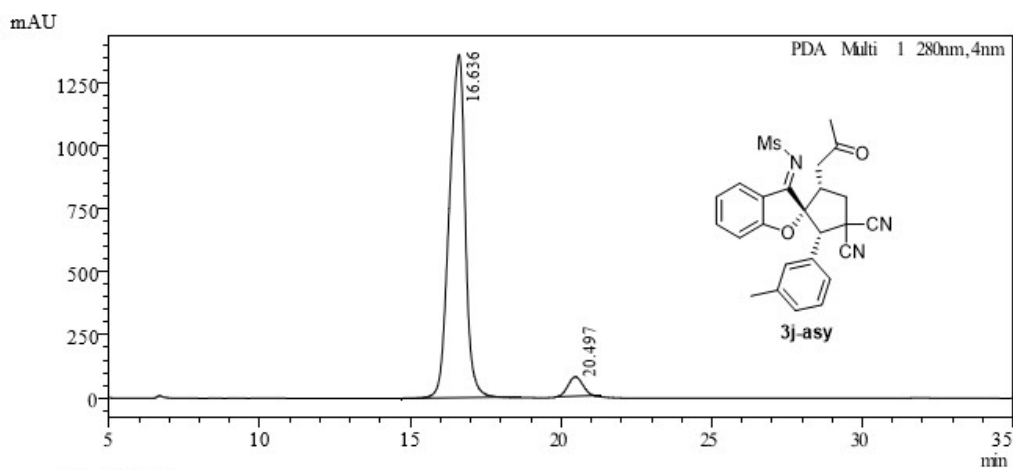

<PeakTable>

PDA Ch1 280nm

| Peak# | Ret. Time | Area     | Height  | Area%   |
|-------|-----------|----------|---------|---------|
| 1     | 16.636    | 50211155 | 1361473 | 94.987  |
| 2     | 20.497    | 2650079  | 75608   | 5.013   |
| Total |           | 52861234 | 1437082 | 100.000 |

## HPLC spectra of 3k

Conditions: Chiralpak IA, *n*-hexane/*i*-propanol = 90/10, flow rate = 1.0 mL/min, I = 280 nm, temp. = 25 °C.

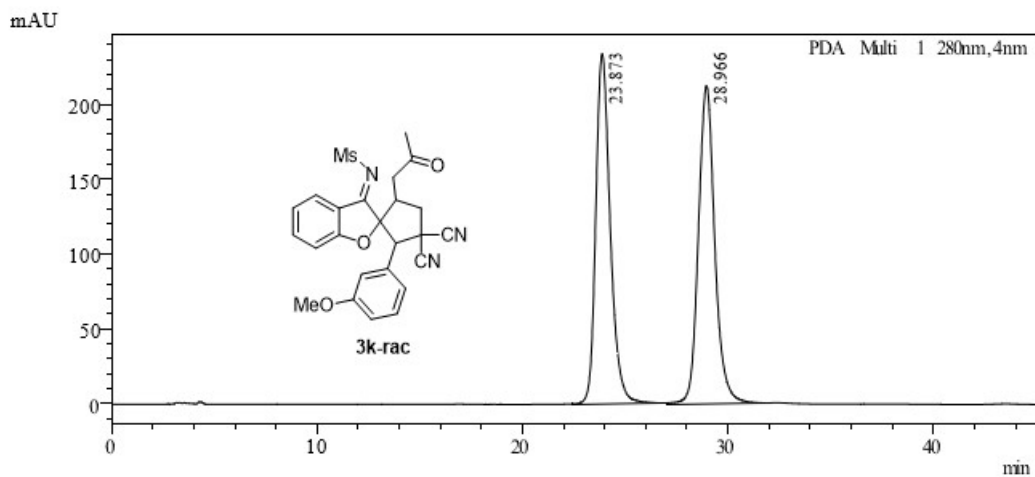

<PeakTable>

PDA Ch1 280nm

| Peak# | Ret. Time | Area     | Height | Area%   |
|-------|-----------|----------|--------|---------|
| 1     | 23.873    | 11704583 | 233445 | 50.153  |
| 2     | 28.966    | 11633198 | 212159 | 49.847  |
| Total |           | 23337781 | 445604 | 100.000 |

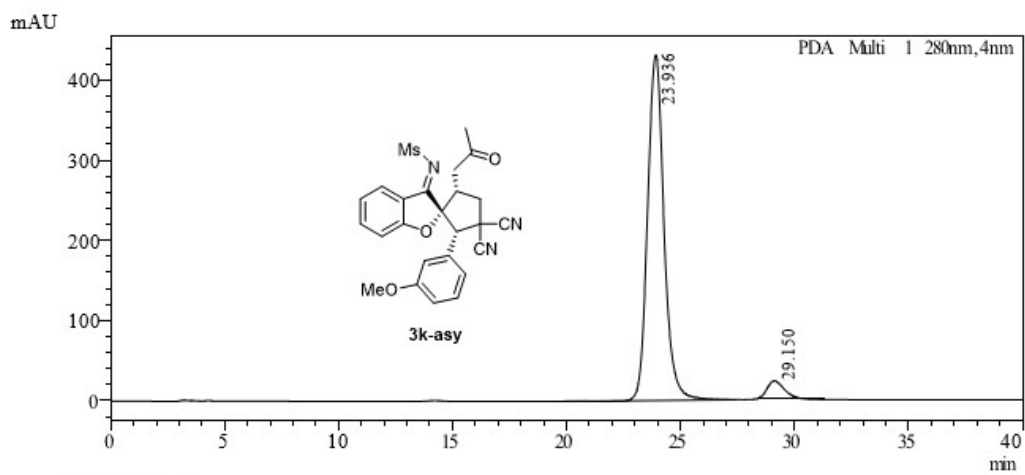

<PeakTable>

PDA Ch1 280nm

| Peak# | Ret. Time | Area     | Height | Area%   |
|-------|-----------|----------|--------|---------|
| 1     | 23.936    | 21567543 | 430315 | 95.245  |
| 2     | 29.150    | 1076629  | 22862  | 4.755   |
| Total |           | 22644172 | 453177 | 100.000 |



## HPLC spectra of 3I

Conditions: Chiralpak IA, *n*-hexane/*i*-propanol = 90/10, flow rate = 1.0 mL/min, I = 280 nm, temp. = 25 °C.

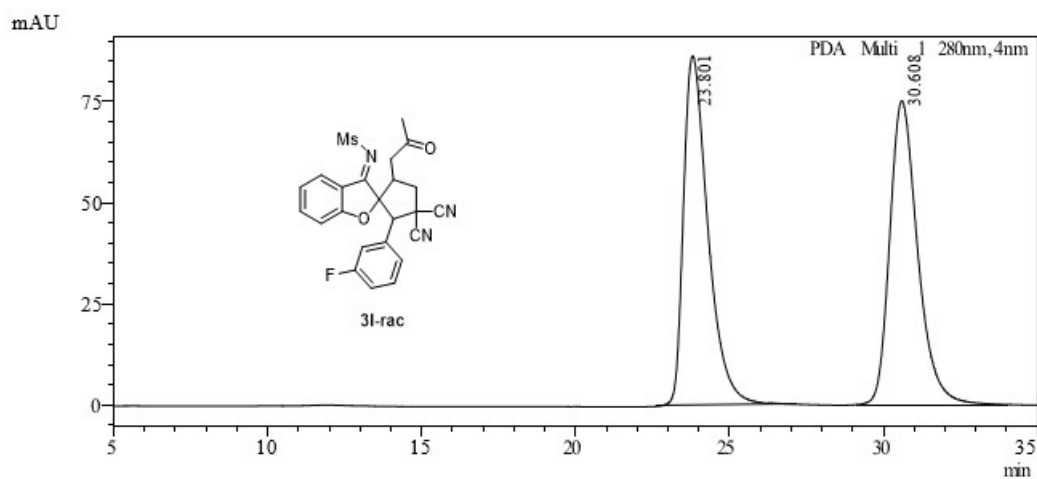

<PeakTable>

PDA Ch1 280nm

| Peak# | Ret.Time | Area    | Height | Area%   |
|-------|----------|---------|--------|---------|
| 1     | 23.801   | 4817682 | 86280  | 50.416  |
| 2     | 30.608   | 4738088 | 75155  | 49.584  |
| Total |          | 9555771 | 161435 | 100.000 |

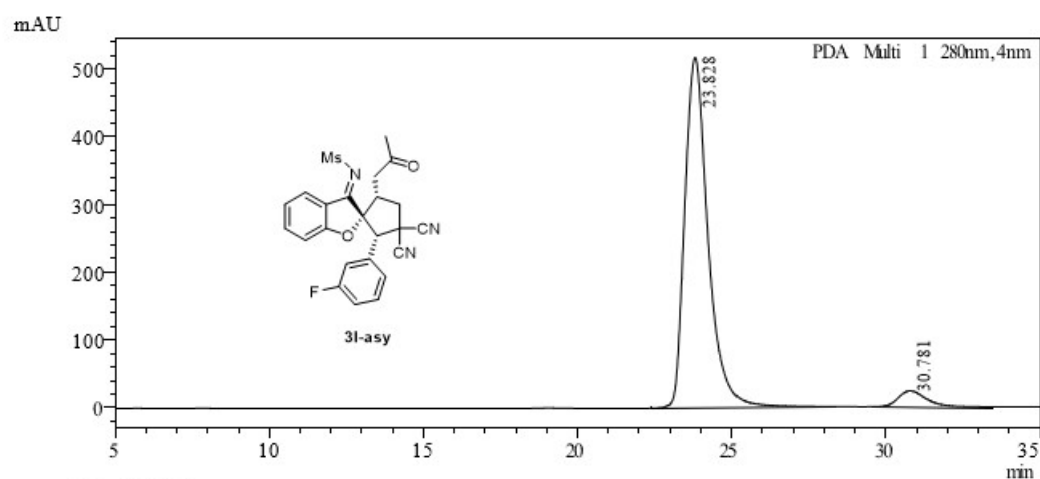

<PeakTable>

PDA Ch1 280nm

| Peak# | Ret.Time | Area     | Height | Area%   |
|-------|----------|----------|--------|---------|
| 1     | 23.828   | 27148405 | 516260 | 94.825  |
| 2     | 30.781   | 1481610  | 23716  | 5.175   |
| Total |          | 28630015 | 539976 | 100.000 |

### HPLC spectra of **3m**

Conditions: Chiralpak IA, *n*-hexane/*i*-propanol = 90/10, flow rate = 1.0 mL/min, I = 280 nm, temp. = 25 °C.

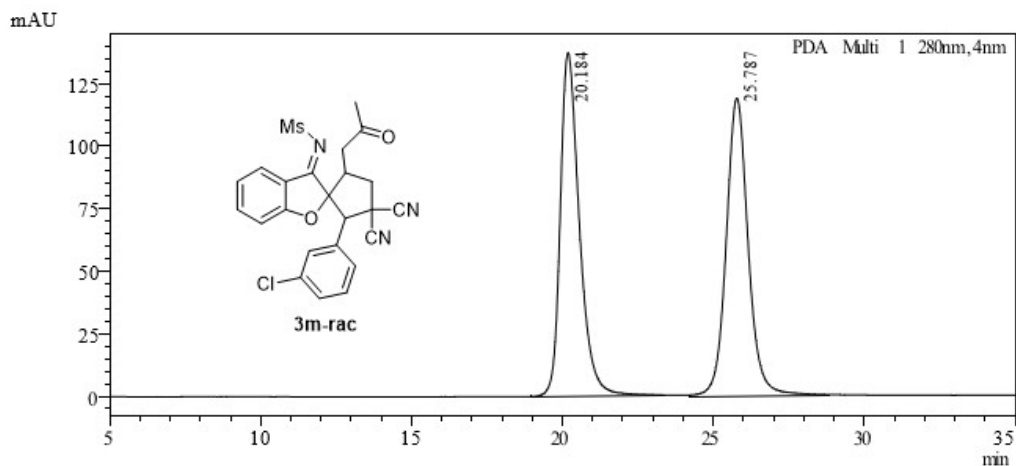

<PeakTable>

PDA Ch1 280nm

| Peak# | Ret.Time | Area     | Height | Area%   |
|-------|----------|----------|--------|---------|
| 1     | 20.184   | 5988825  | 136983 | 50.159  |
| 2     | 25.787   | 5950767  | 118596 | 49.841  |
| Total |          | 11939592 | 255579 | 100.000 |

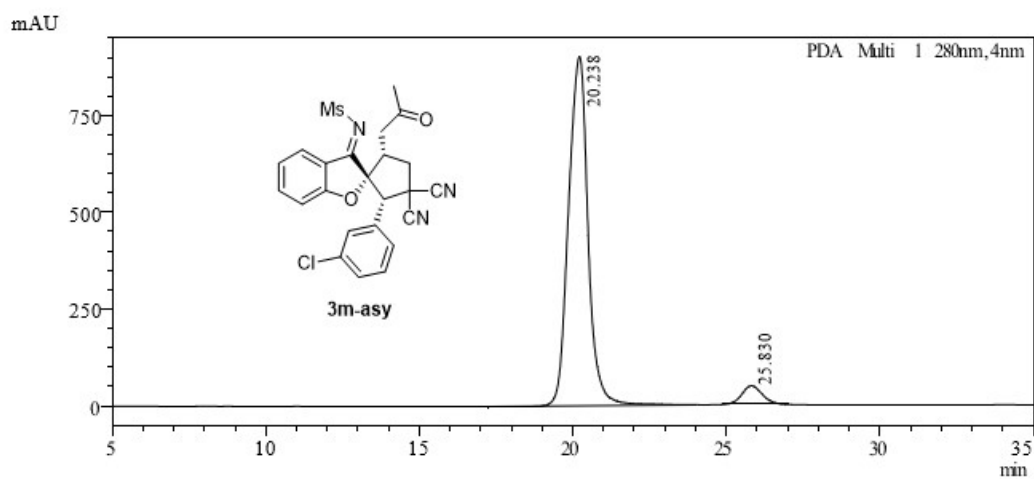

<PeakTable>

PDA Ch1 280nm

| Peak# | Ret.Time | Area     | Height | Area%   |
|-------|----------|----------|--------|---------|
| 1     | 20.238   | 40074045 | 901188 | 95.669  |
| 2     | 25.830   | 1814210  | 46594  | 4.331   |
| Total |          | 41888255 | 947783 | 100.000 |

## HPLC spectra of **3n**

Conditions: Chiralpak IA, *n*-hexane/*i*-propanol = 90/10, flow rate = 1.0 mL/min, I = 280 nm, temp. = 25 °C.

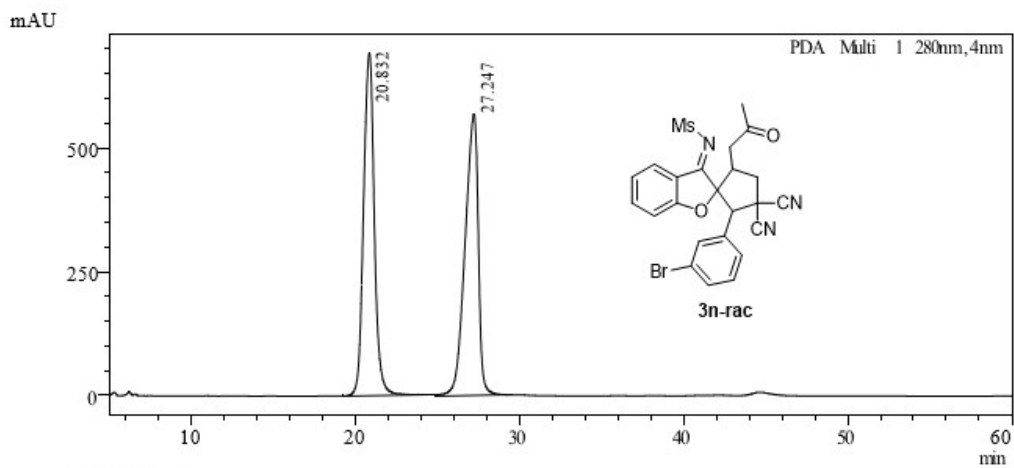

<PeakTable>

PDA Ch1 280nm

| Peak# | Ret. Time | Area     | Height  | Area%   |
|-------|-----------|----------|---------|---------|
| 1     | 20.832    | 31918151 | 690906  | 50.189  |
| 2     | 27.247    | 31677345 | 567710  | 49.811  |
| Total |           | 63595496 | 1258616 | 100.000 |

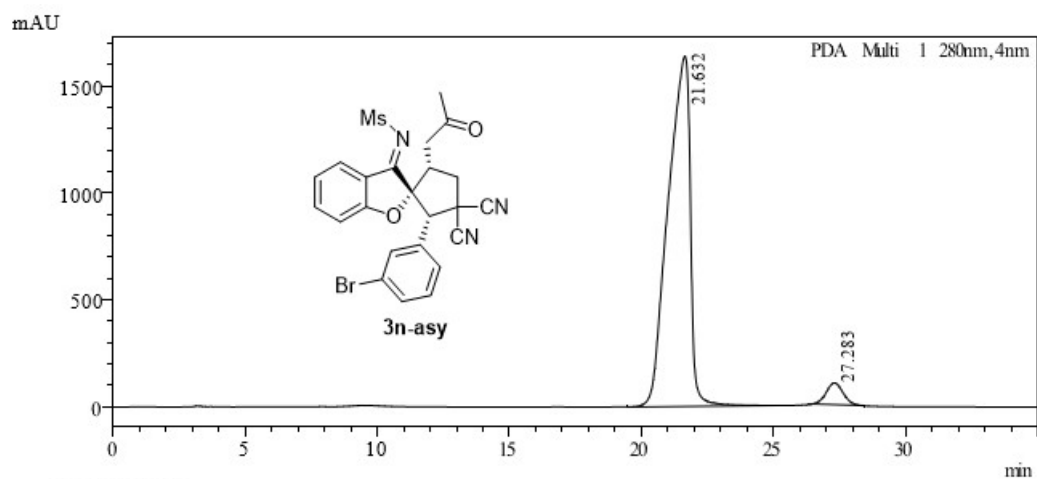

<PeakTable>

PDA Ch1 280nm

| Peak# | Ret. Time | Area     | Height  | Area%   |
|-------|-----------|----------|---------|---------|
| 1     | 21.632    | 95264281 | 1637115 | 95.276  |
| 2     | 27.283    | 4723057  | 100945  | 4.724   |
| Total |           | 99987338 | 1738060 | 100.000 |

## HPLC spectra of **3o**

Chiralpak IA, *n*-hexane/*i*-propanol = 90/10, flow rate = 1.0 mL/min, I = 280 nm, temp. = 25 °C.

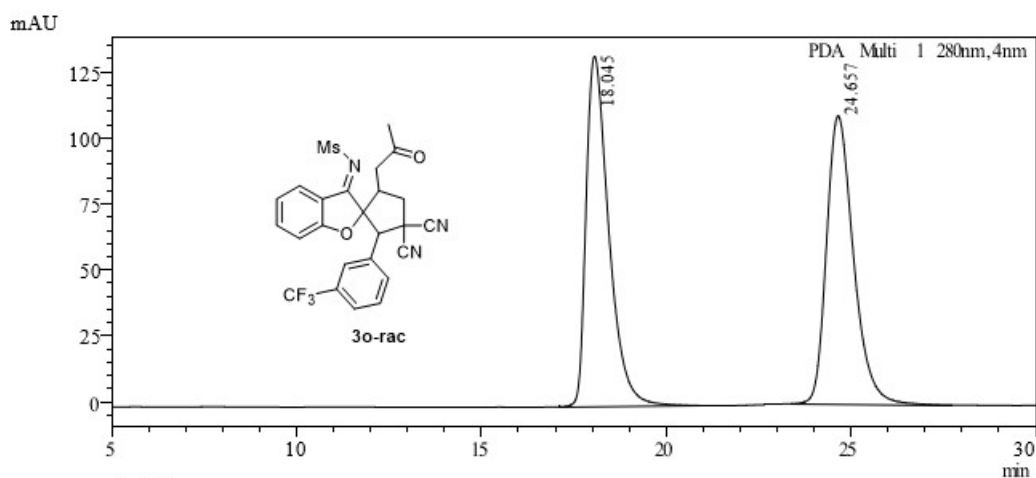

<PeakTable>

PDA Ch1 280nm

| Peak# | Ret.Time | Area     | Height | Area%   |
|-------|----------|----------|--------|---------|
| 1     | 18.045   | 5647342  | 132475 | 50.265  |
| 2     | 24.657   | 5587727  | 109607 | 49.735  |
| Total |          | 11235069 | 242082 | 100.000 |

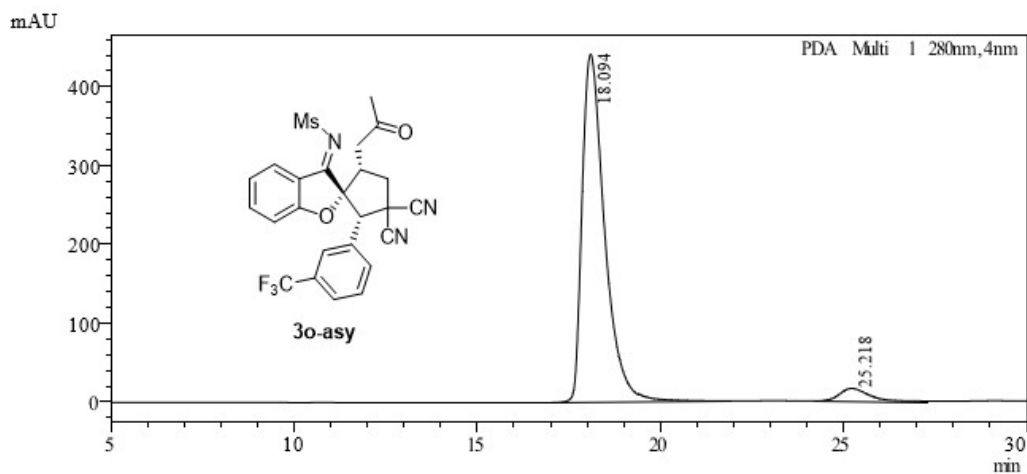

<PeakTable>

PDA Ch1 280nm

| Peak# | Ret.Time | Area     | Height | Area%   |
|-------|----------|----------|--------|---------|
| 1     | 18.094   | 18854944 | 440638 | 95.693  |
| 2     | 25.218   | 848677   | 15925  | 4.307   |
| Total |          | 19703621 | 456563 | 100.000 |

### HPLC spectra of 3p

Conditions: Chiralpak IA, *n*-hexane/*i*-propanol = 90/10, flow rate = 1.0 mL/min, I = 265 nm, temp. = 25 °C.

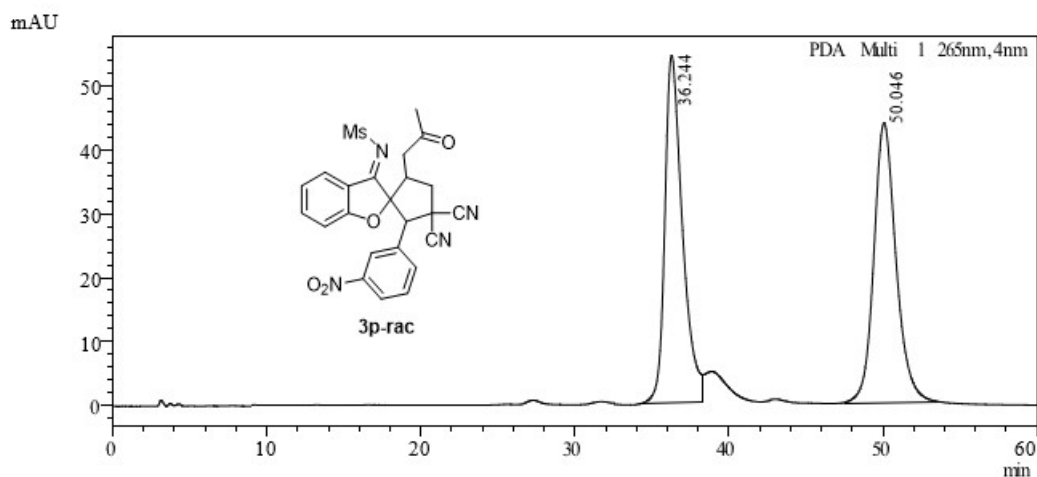

<PeakTable>

PDA Ch1 265nm

| Peak# | Ret.Time | Area    | Height | Area%   |
|-------|----------|---------|--------|---------|
| 1     | 36.244   | 4336103 | 54201  | 50.062  |
| 2     | 50.046   | 4325285 | 43686  | 49.938  |
| Total |          | 8661388 | 97887  | 100.000 |

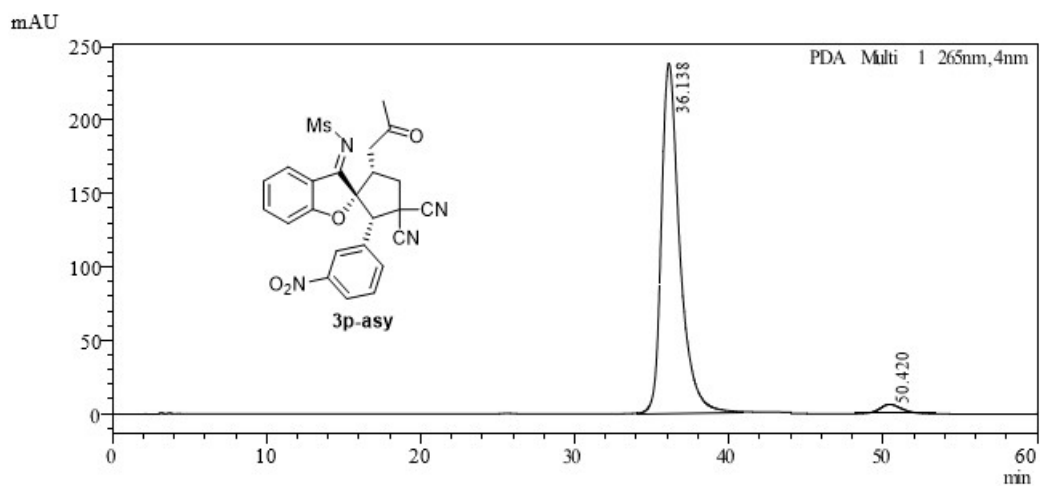

<PeakTable>

PDA Ch1 265nm

| Peak# | Ret.Time | Area     | Height | Area%   |
|-------|----------|----------|--------|---------|
| 1     | 36.138   | 18761315 | 237623 | 96.947  |
| 2     | 50.420   | 590841   | 5808   | 3.053   |
| Total |          | 19352156 | 243432 | 100.000 |

## HPLC spectra of 3q

Conditions: Chiralpak IA, *n*-hexane/*i*-propanol = 90/10, flow rate = 1.0 mL/min, I = 280 nm, temp. = 25 °C.

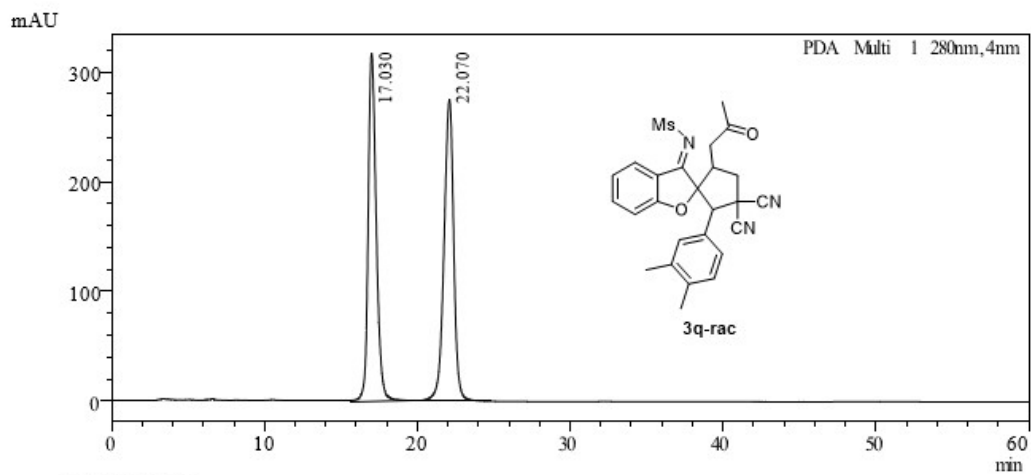

<PeakTable>

PDA Ch1 280nm

| Peak# | Ret.Time | Area     | Height | Area%   |
|-------|----------|----------|--------|---------|
| 1     | 17.030   | 11957334 | 316316 | 50.040  |
| 2     | 22.070   | 11938228 | 274378 | 49.960  |
| Total |          | 23895562 | 590695 | 100.000 |

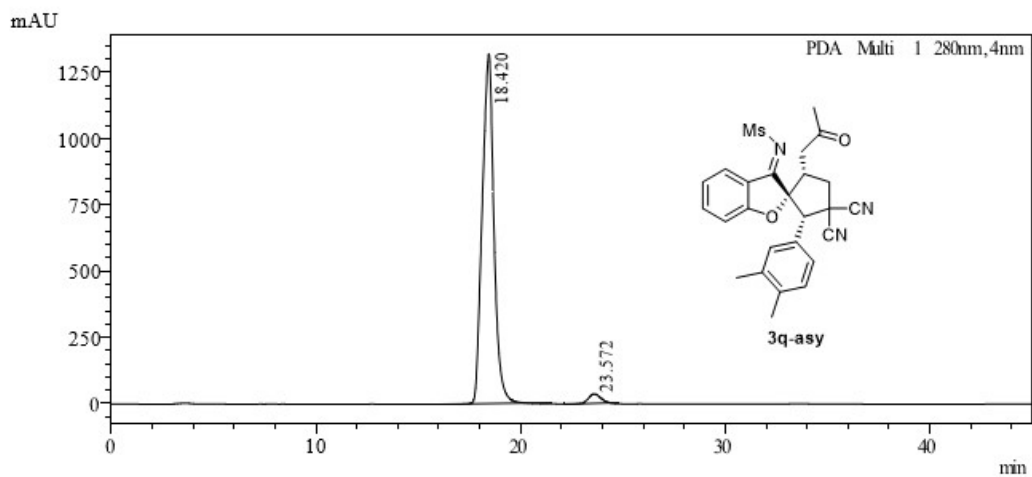

<PeakTable>

PDA Ch1 280nm

| Peak# | Ret.Time | Area     | Height  | Area%   |
|-------|----------|----------|---------|---------|
| 1     | 18.420   | 52485322 | 1316413 | 96.914  |
| 2     | 23.572   | 1671178  | 36850   | 3.086   |
| Total |          | 54156500 | 1353263 | 100.000 |

## HPLC spectra of 3r

Conditions: Chiralpak IA, *n*-hexane/*i*-propanol = 90/10, flow rate = 1.0 mL/min, I = 280 nm, temp. = 25 °C.

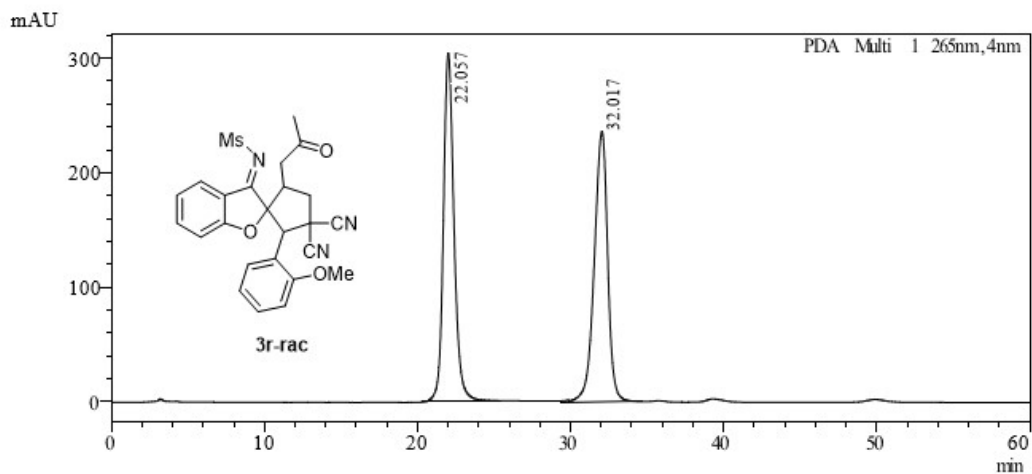

<PeakTable>

PDA Ch1 265nm

| Peak# | Ret.Time | Area     | Height | Area%   |
|-------|----------|----------|--------|---------|
| 1     | 22.057   | 14472231 | 303844 | 50.240  |
| 2     | 32.017   | 14334075 | 236466 | 49.760  |
| Total |          | 28806306 | 540311 | 100.000 |

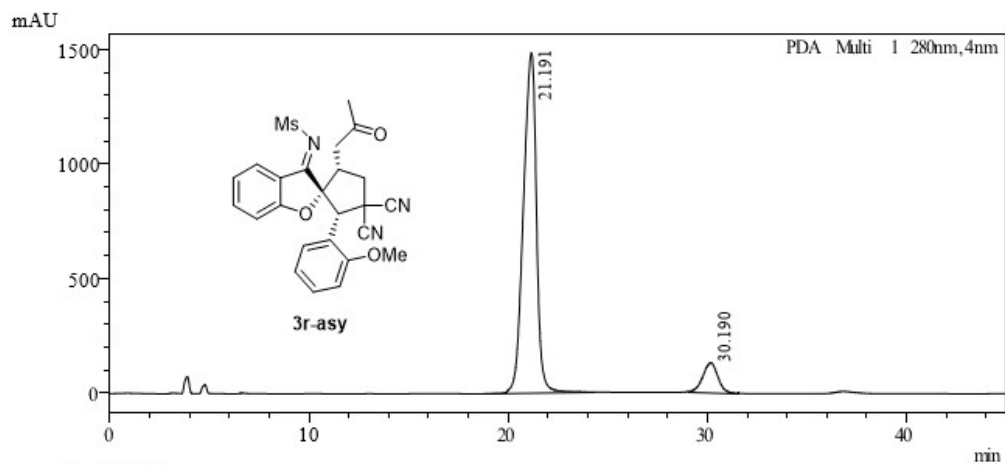

<PeakTable>

PDA Ch1 280nm

| Peak# | Ret.Time | Area     | Height  | Area%   |
|-------|----------|----------|---------|---------|
| 1     | 21.191   | 68278358 | 1483193 | 90.929  |
| 2     | 30.190   | 6811241  | 131981  | 9.071   |
| Total |          | 75089600 | 1615174 | 100.000 |

### HPLC spectra of **3s**

Conditions: Chiralpak IA, *n*-hexane/*i*-propanol = 90/10, flow rate = 1.0 mL/min, I = 280 nm, temp. = 25 °C.

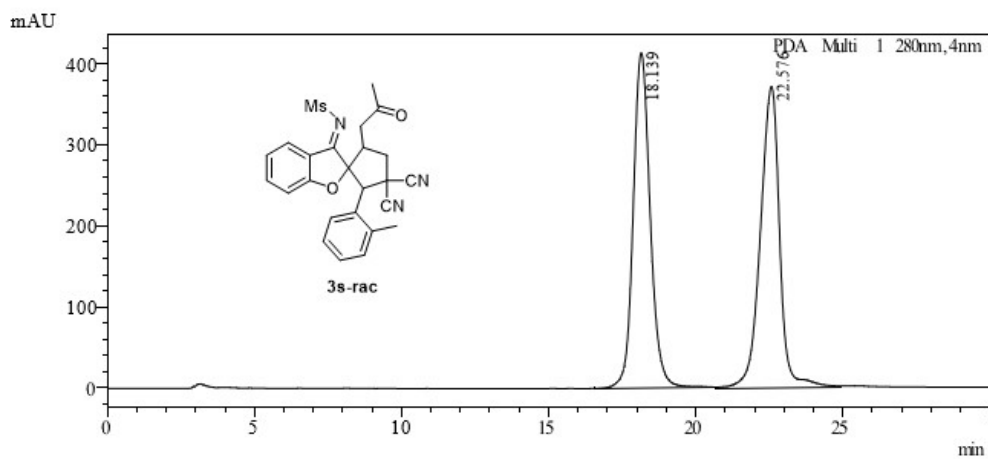

<PeakTable>

PDA Ch1 280nm

| Peak# | Ret.Time | Area     | Height | Area%   |
|-------|----------|----------|--------|---------|
| 1     | 18.139   | 16726631 | 412523 | 50.149  |
| 2     | 22.576   | 16627458 | 371138 | 49.851  |
| Total |          | 33354089 | 783661 | 100.000 |

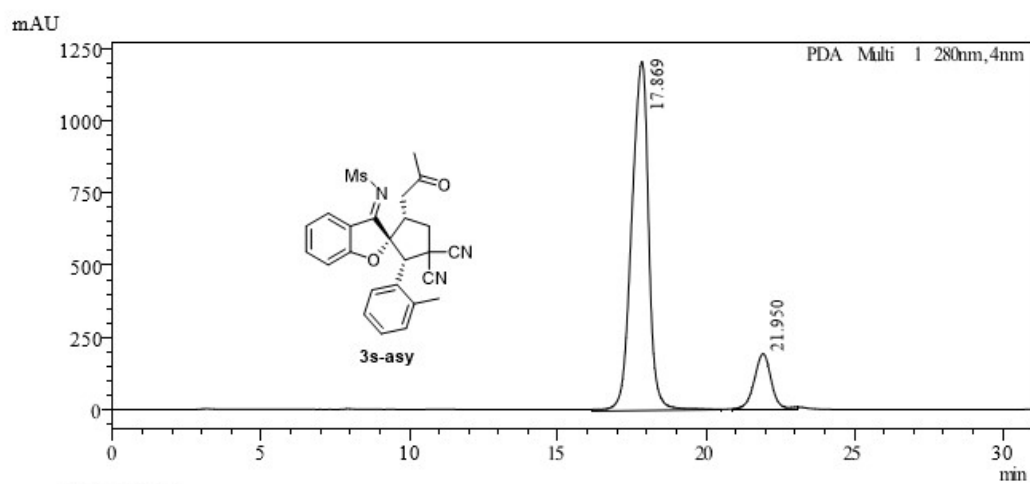

<PeakTable>

PDA Ch1 280nm

| Peak# | Ret.Time | Area     | Height  | Area%   |
|-------|----------|----------|---------|---------|
| 1     | 17.869   | 47386513 | 1204581 | 85.598  |
| 2     | 21.950   | 7973087  | 195593  | 14.402  |
| Total |          | 55359600 | 1400174 | 100.000 |



## HPLC spectra of 3t

Conditions: Chiralpak IA, *n*-hexane/*i*-propanol = 90/10, flow rate = 1.0 mL/min, I = 280 nm, temp. = 25 °C.

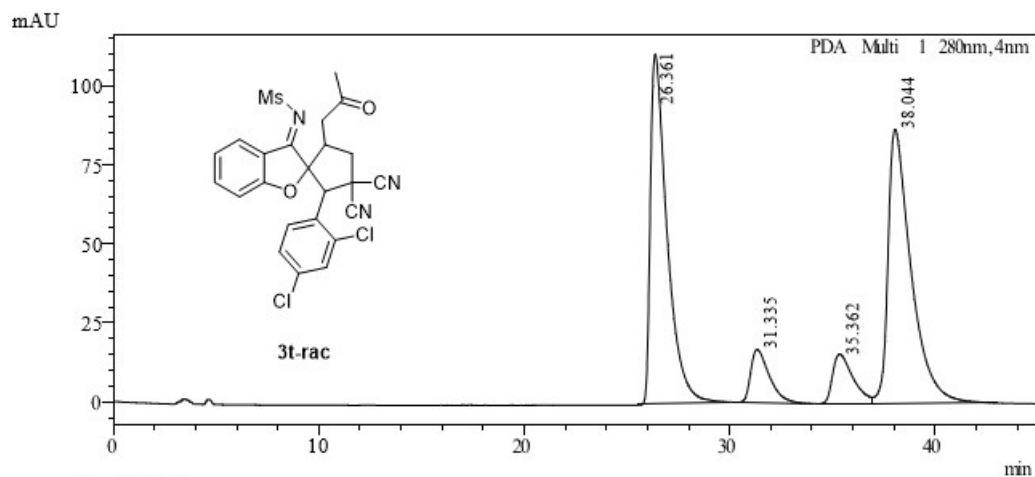

<PeakTable>

PDA Ch1 280nm

| Peak# | Ret.Time | Area     | Height | Area%   |
|-------|----------|----------|--------|---------|
| 1     | 26.361   | 6305907  | 110632 | 41.005  |
| 2     | 31.335   | 1076385  | 17118  | 6.999   |
| 3     | 35.362   | 1049270  | 15511  | 6.823   |
| 4     | 38.044   | 6946782  | 86644  | 45.172  |
| Total |          | 15378344 | 229905 | 100.000 |

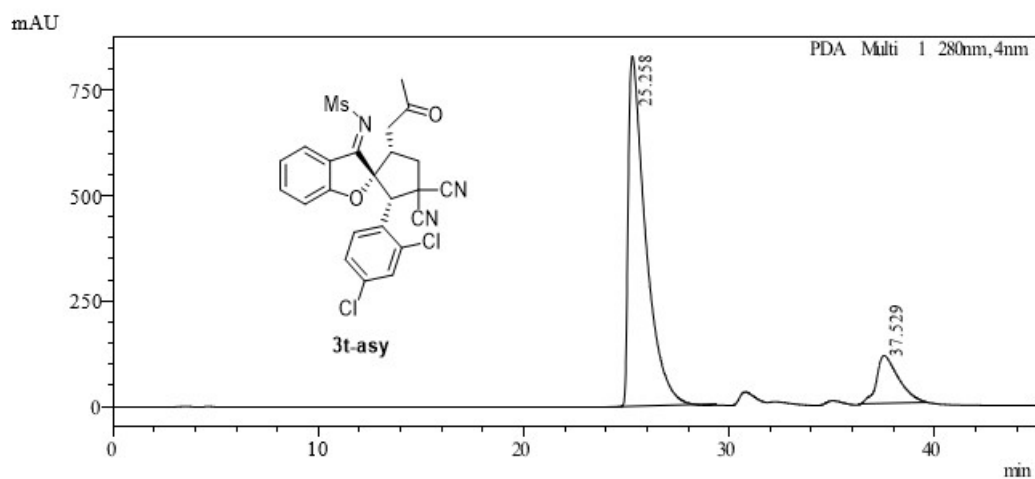

<PeakTable>

PDA Ch1 280nm

| Peak# | Ret.Time | Area     | Height | Area%   |
|-------|----------|----------|--------|---------|
| 1     | 25.258   | 48752544 | 827913 | 85.207  |
| 2     | 37.529   | 8463966  | 112272 | 14.793  |
| Total |          | 57216510 | 940186 | 100.000 |

## HPLC spectra of 3u

Conditions: Chiralpak IA, *n*-hexane/*i*-propanol = 90/10, flow rate = 1.0 mL/min, I = 280 nm, temp. = 25 °C.

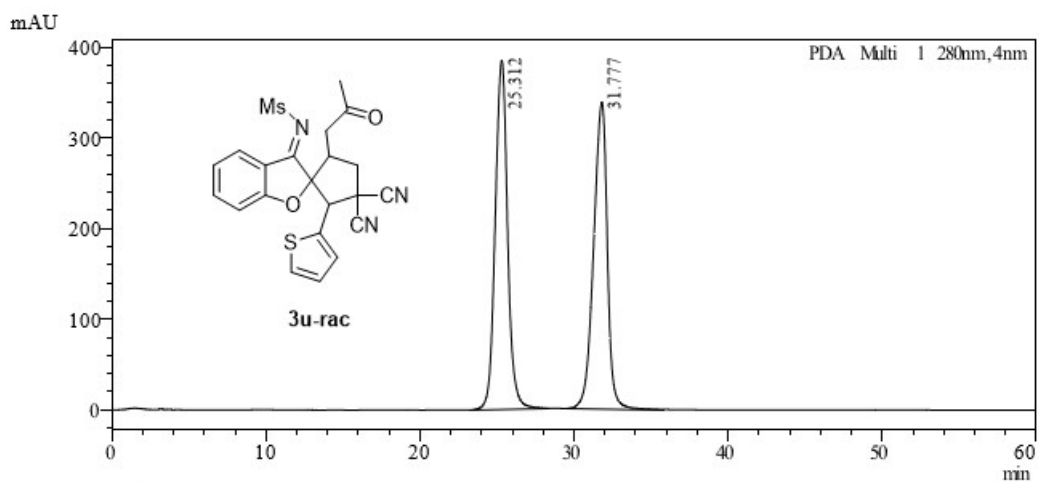

<PeakTable>

PDA Ch1 280nm

| Peak# | Ret.Time | Area     | Height | Area%   |
|-------|----------|----------|--------|---------|
| 1     | 25.312   | 21042113 | 385310 | 50.052  |
| 2     | 31.777   | 20998090 | 339144 | 49.948  |
| Total |          | 42040203 | 724455 | 100.000 |

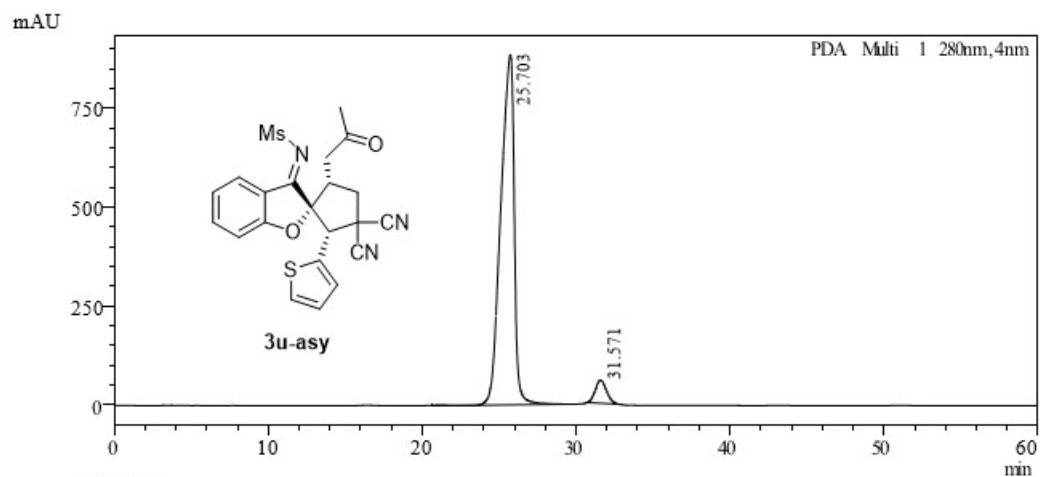

<PeakTable>

PDA Ch1 280nm

| Peak# | Ret.Time | Area     | Height | Area%   |
|-------|----------|----------|--------|---------|
| 1     | 25.703   | 54138211 | 882708 | 94.877  |
| 2     | 31.571   | 2923183  | 56986  | 5.123   |
| Total |          | 57061395 | 939694 | 100.000 |

## HPLC spectra of 3v

Conditions: Chiralpak OD-H, *n*-hexane/*i*-propanol = 90/10, flow rate = 1.0 mL/min, I = 280 nm, temp. = 25 °C.

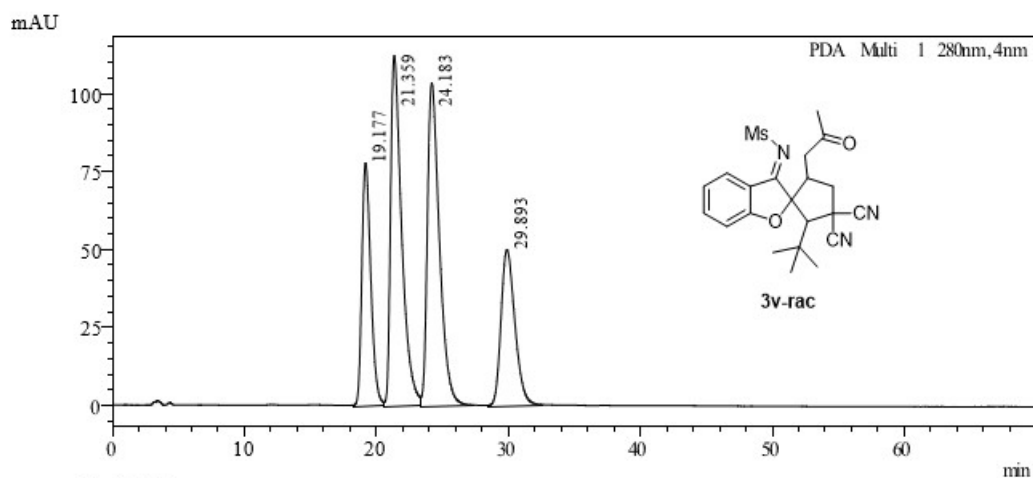

<PeakTable>

PDA Ch1 280nm

| Peak# | Ret.Time | Area     | Height | Area%   |
|-------|----------|----------|--------|---------|
| 1     | 19.177   | 3640847  | 77873  | 17.880  |
| 2     | 21.359   | 6546578  | 111942 | 32.150  |
| 3     | 24.183   | 6550030  | 103369 | 32.167  |
| 4     | 29.893   | 3624917  | 49494  | 17.802  |
| Total |          | 20362372 | 342678 | 100.000 |

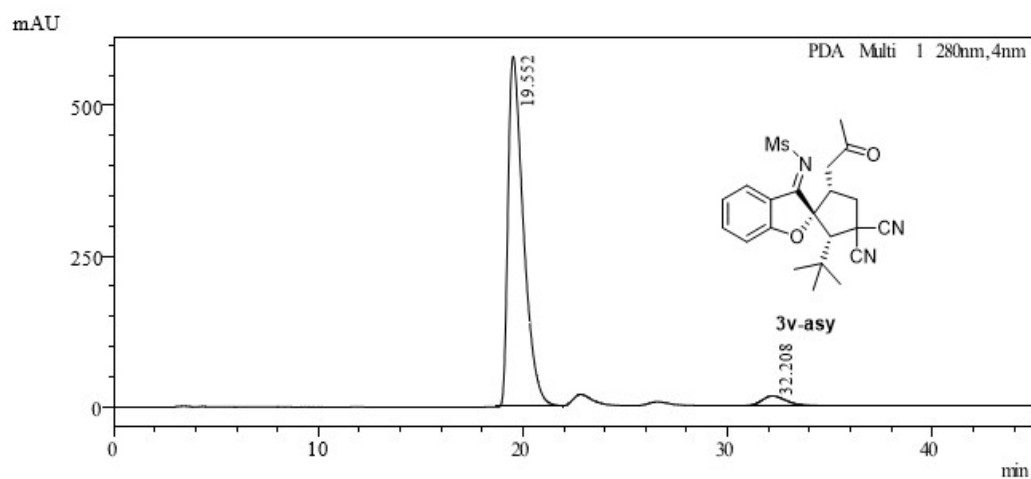

<PeakTable>

PDA Ch1 280nm

| Peak# | Ret.Time | Area     | Height | Area%   |
|-------|----------|----------|--------|---------|
| 1     | 19.552   | 30412585 | 579840 | 95.551  |
| 2     | 32.208   | 1416183  | 17568  | 4.449   |
| Total |          | 31828768 | 597408 | 100.000 |

### HPLC spectra of **3w**

Conditions: Chiralpak IA, *n*-hexane/*i*-propanol = 90/10, flow rate = 1.0 mL/min, I = 280 nm, temp. = 25 °C.

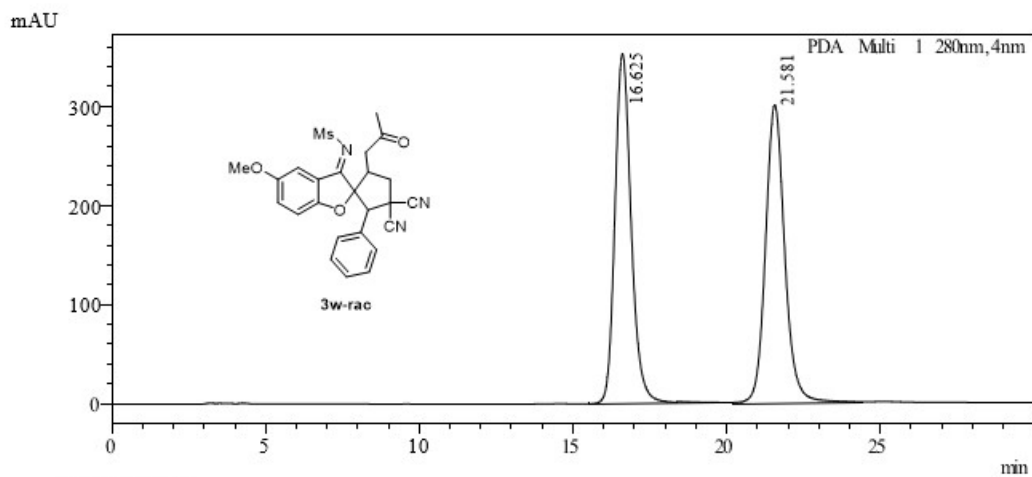

<PeakTable>

PDA Ch1 280nm

| Peak# | Ret.Time | Area     | Height | Area%   |
|-------|----------|----------|--------|---------|
| 1     | 16.625   | 13028257 | 352376 | 50.085  |
| 2     | 21.581   | 12984176 | 300177 | 49.915  |
| Total |          | 26012433 | 652553 | 100.000 |

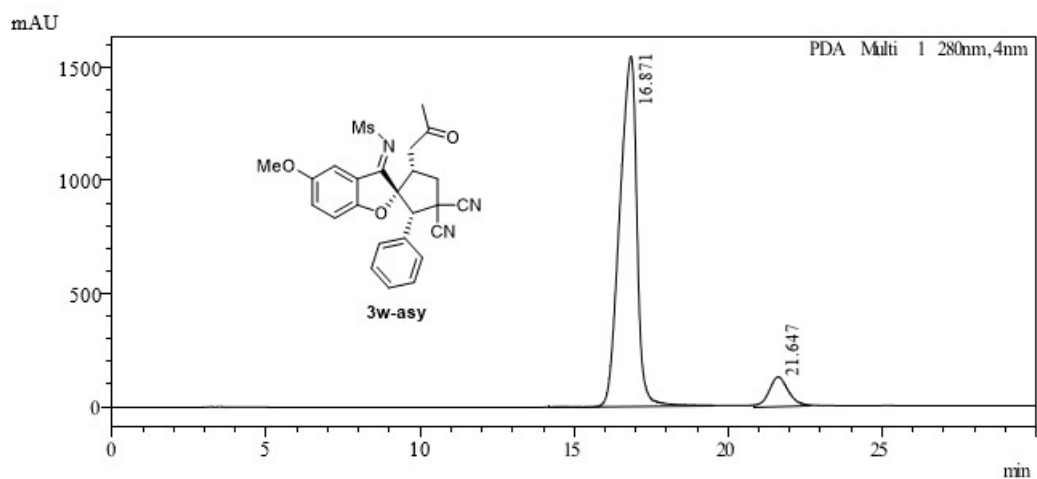

<PeakTable>

PDA Ch1 280nm

| Peak# | Ret.Time | Area     | Height  | Area%   |
|-------|----------|----------|---------|---------|
| 1     | 16.871   | 59879416 | 1546185 | 91.890  |
| 2     | 21.647   | 5284895  | 129170  | 8.110   |
| Total |          | 65164312 | 1675356 | 100.000 |

## HPLC spectra of 3x

Conditions: Chiralpak IA, *n*-hexane/*i*-propanol = 90/10, flow rate = 1.0 mL/min, I = 280 nm, temp. = 25 °C.

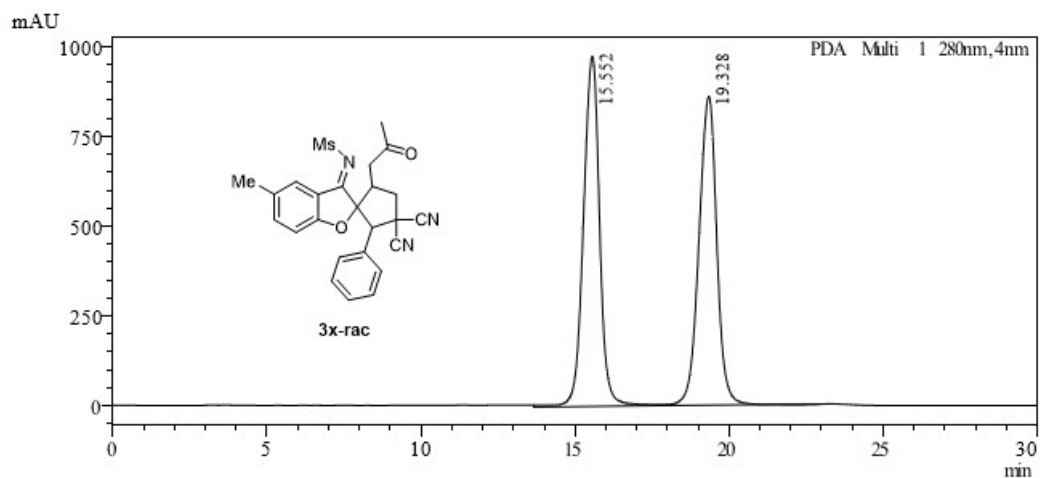

<PeakTable>

PDA Ch1 280nm

| Peak# | Ret.Time | Area     | Height  | Area%   |
|-------|----------|----------|---------|---------|
| 1     | 15.552   | 34519702 | 970816  | 50.213  |
| 2     | 19.328   | 34226486 | 857202  | 49.787  |
| Total |          | 68746188 | 1828017 | 100.000 |

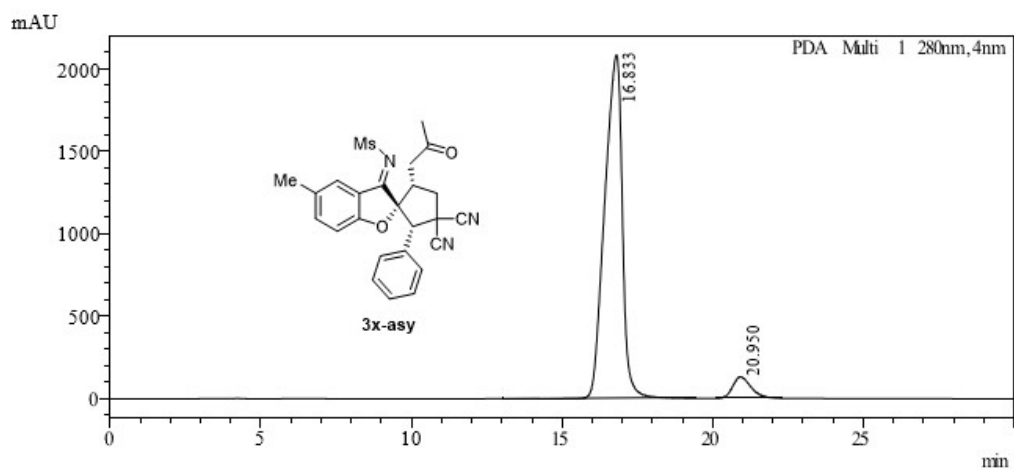

<PeakTable>

PDA Ch1 280nm

| Peak# | Ret.Time | Area     | Height  | Area%   |
|-------|----------|----------|---------|---------|
| 1     | 16.833   | 84499410 | 2081740 | 93.853  |
| 2     | 20.950   | 5534457  | 129788  | 6.147   |
| Total |          | 90033867 | 2211527 | 100.000 |

## HPLC spectra of 3y

Conditions: Chiralpak IA, *n*-hexane/*i*-propanol = 90/10, flow rate = 1.0 mL/min, I = 280 nm, temp. = 25 °C.

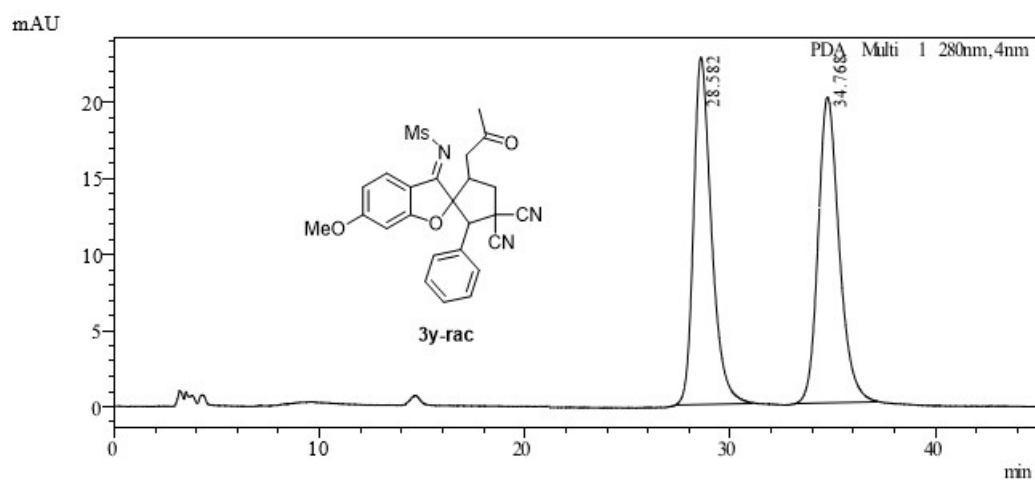

<PeakTable>

PDA Ch1 280nm

| Peak# | Ret. Time | Area    | Height | Area%   |
|-------|-----------|---------|--------|---------|
| 1     | 28.582    | 1395937 | 22787  | 49.798  |
| 2     | 34.768    | 1407257 | 20076  | 50.202  |
| Total |           | 2803194 | 42863  | 100.000 |

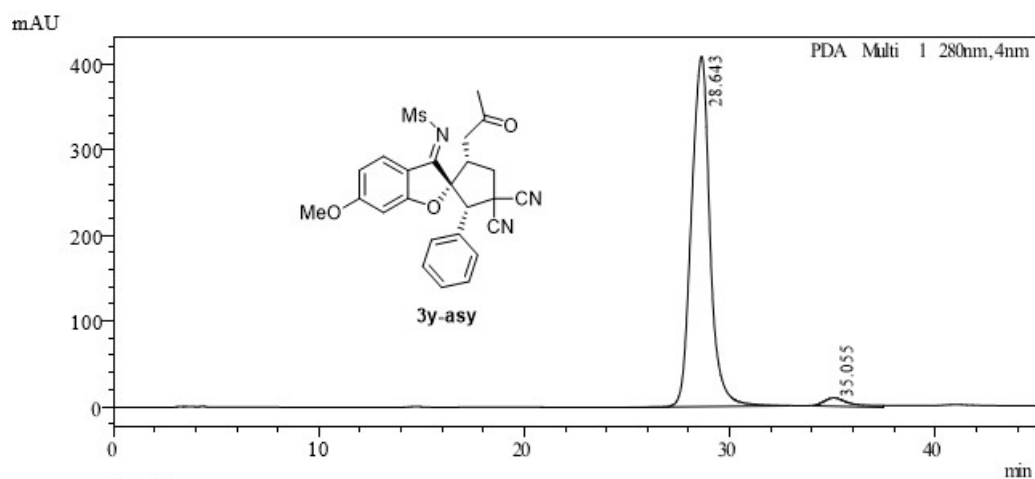

<PeakTable>

PDA Ch1 280nm

| Peak# | Ret. Time | Area     | Height | Area%   |
|-------|-----------|----------|--------|---------|
| 1     | 28.643    | 25166682 | 407997 | 97.581  |
| 2     | 35.055    | 623795   | 9349   | 2.419   |
| Total |           | 25790477 | 417346 | 100.000 |

### HPLC spectra of **3z**

Conditions: Chiralpak IA, *n*-hexane/*i*-propanol = 93/7, flow rate = 1.0 mL/min, I = 280 nm, temp. = 25 °C.

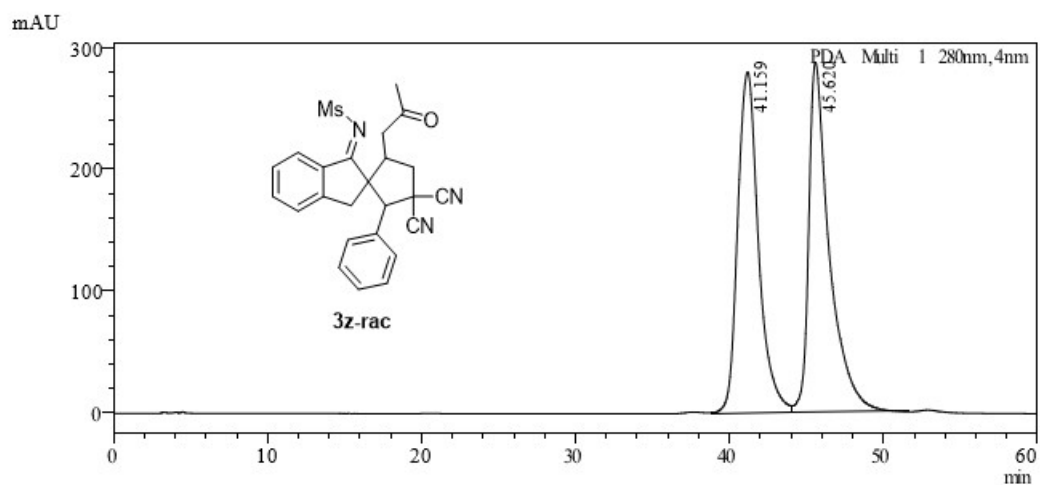

<PeakTable>

PDA Ch1 280nm

| Peak# | Ret.Time | Area     | Height | Area%   |
|-------|----------|----------|--------|---------|
| 1     | 41.159   | 26249435 | 279581 | 49.819  |
| 2     | 45.620   | 26440011 | 286157 | 50.181  |
| Total |          | 52689446 | 565739 | 100.000 |

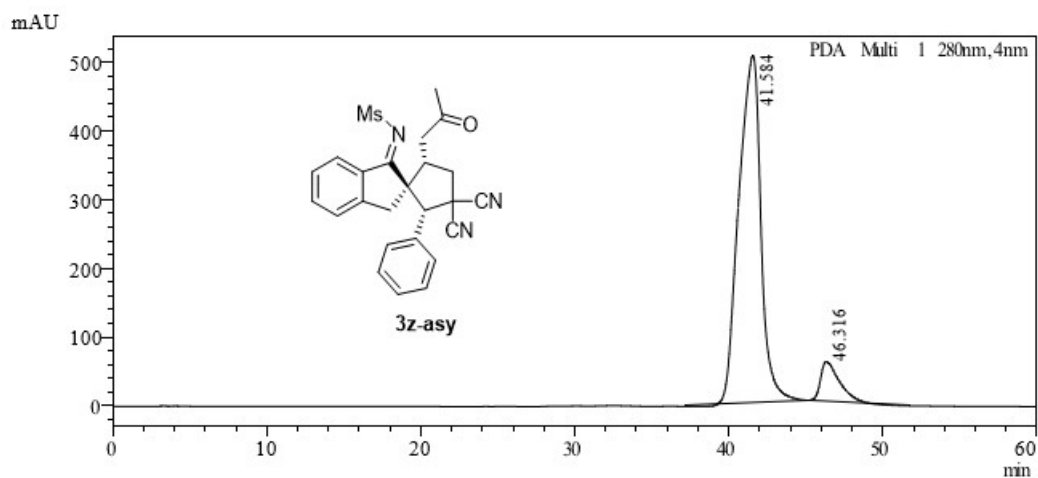

<PeakTable>

PDA Ch1 280nm

| Peak# | Ret.Time | Area     | Height | Area%   |
|-------|----------|----------|--------|---------|
| 1     | 41.584   | 50454514 | 504619 | 91.235  |
| 2     | 46.316   | 4847109  | 57565  | 8.765   |
| Total |          | 55301623 | 562184 | 100.000 |

## HPLC spectra of 3aa

Conditions: Chiralpak IA, *n*-hexane/*i*-propanol = 90/10, flow rate = 1.0 mL/min, I = 280 nm, temp. = 25 °C.

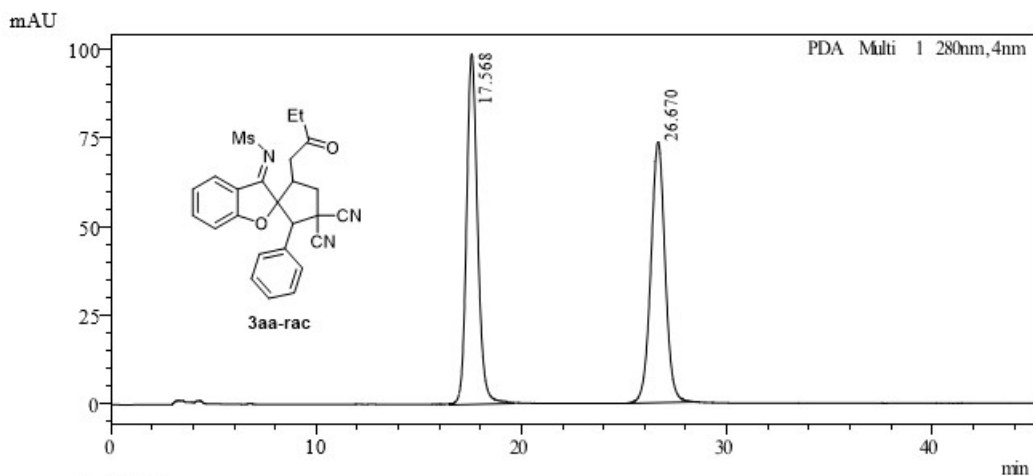

<PeakTable>

PDA Ch1 280nm

| Peak# | Ret.Time | Area    | Height | Area%   |
|-------|----------|---------|--------|---------|
| 1     | 17.568   | 3600678 | 98289  | 50.292  |
| 2     | 26.670   | 3558860 | 73346  | 49.708  |
| Total |          | 7159538 | 171635 | 100.000 |

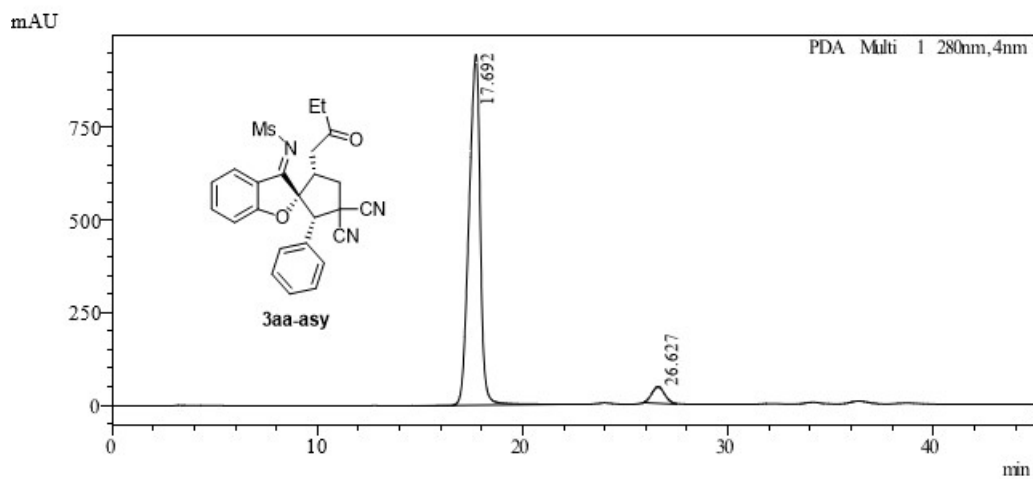

<PeakTable>

PDA Ch1 280nm

| Peak# | Ret.Time | Area     | Height | Area%   |
|-------|----------|----------|--------|---------|
| 1     | 17.692   | 35877676 | 945729 | 94.976  |
| 2     | 26.627   | 1897862  | 44624  | 5.024   |
| Total |          | 37775537 | 990354 | 100.000 |



## HPLC spectra of 3ab

Conditions: Chiralpak IA *n*-hexane/*i*-propanol = 90/10, flow rate = 1.0 mL/min, I = 280 nm, temp. = 25 °C.

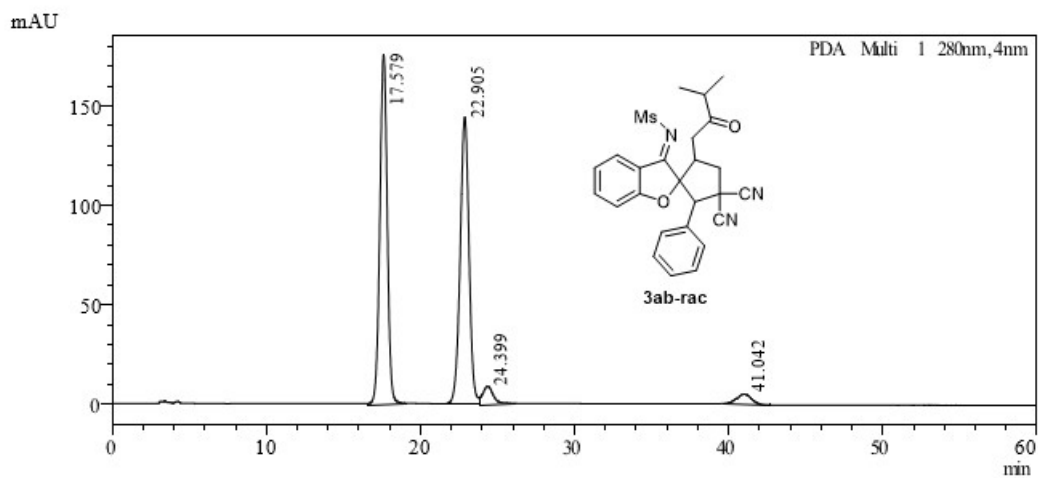

<PeakTable>

PDA Ch1 280nm

| Peak# | Ret.Time | Area     | Height | Area%   |
|-------|----------|----------|--------|---------|
| 1     | 17.579   | 5823921  | 175351 | 46.877  |
| 2     | 22.905   | 5820873  | 144055 | 46.853  |
| 3     | 24.399   | 413318   | 8829   | 3.327   |
| 4     | 41.042   | 365629   | 5481   | 2.943   |
| Total |          | 12423742 | 333717 | 100.000 |

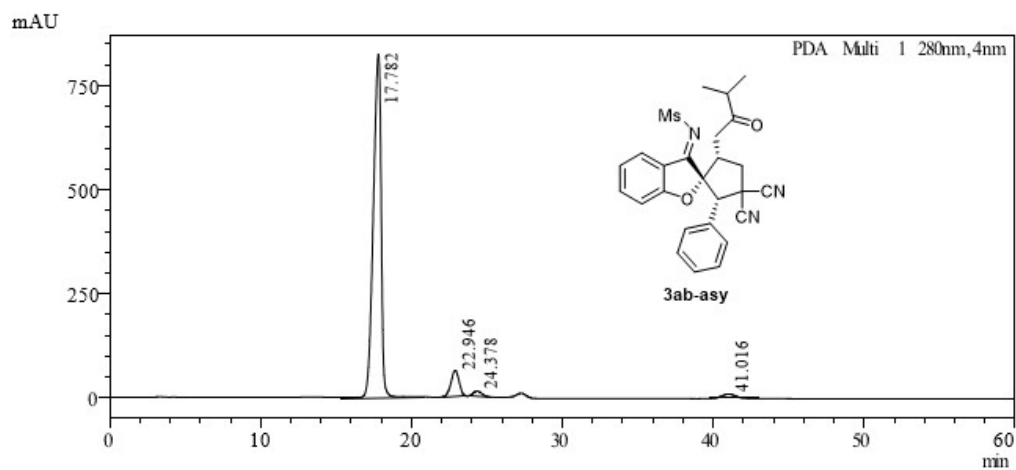

<PeakTable>

PDA Ch1 280nm

| Peak# | Ret.Time | Area     | Height | Area%   |
|-------|----------|----------|--------|---------|
| 1     | 17.782   | 29432353 | 824166 | 88.726  |
| 2     | 22.946   | 2406055  | 63814  | 7.253   |
| 3     | 24.378   | 595309   | 15525  | 1.795   |
| 4     | 41.016   | 738547   | 11161  | 2.226   |
| Total |          | 33172263 | 914665 | 100.000 |

## HPLC spectra of 3ac

Conditions: Chiralpak IC *n*-hexane/*i*-propanol = 90/10, flow rate = 1.0 mL/min, I = 280 nm, temp. = 25 °C.

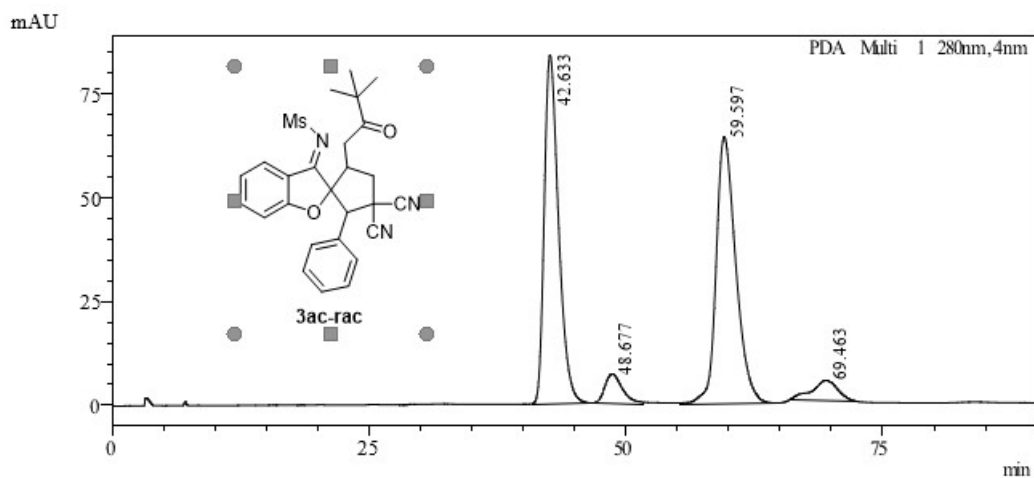

<PeakTable>

| PDA Ch1 280nm |          |          |        |         |
|---------------|----------|----------|--------|---------|
| Peak#         | Ret.Time | Area     | Height | Area%   |
| 1             | 42.633   | 8111785  | 83587  | 44.631  |
| 2             | 48.677   | 752229   | 6752   | 4.139   |
| 3             | 59.597   | 8442625  | 63849  | 46.452  |
| 4             | 69.463   | 868475   | 4998   | 4.778   |
| Total         |          | 18175114 | 159187 | 100.000 |

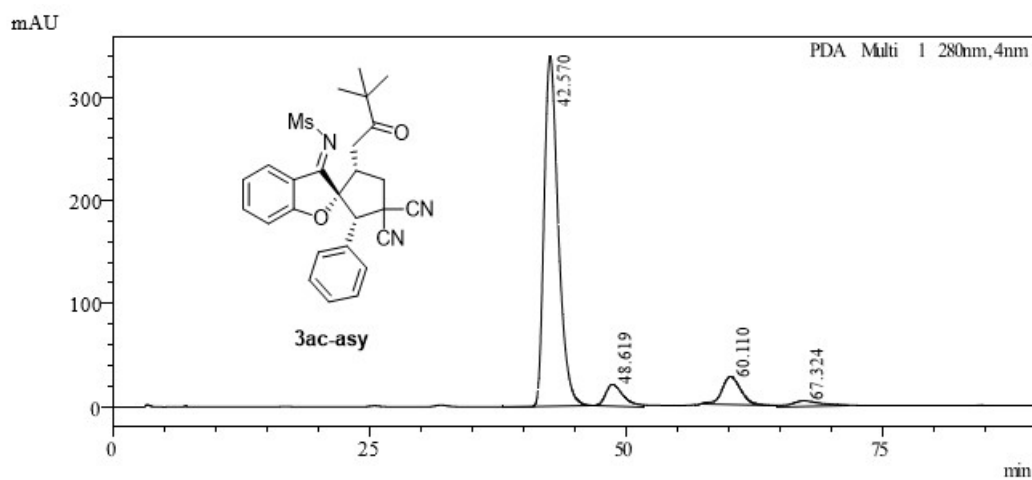

<PeakTable>

| PDA Ch1 280nm |          |          |        |         |
|---------------|----------|----------|--------|---------|
| Peak#         | Ret.Time | Area     | Height | Area%   |
| 1             | 42.570   | 32317121 | 339014 | 83.381  |
| 2             | 48.619   | 2214578  | 20043  | 5.714   |
| 3             | 60.110   | 3475624  | 26889  | 8.967   |
| 4             | 67.324   | 751059   | 4601   | 1.938   |
| Total         |          | 38758382 | 390546 | 100.000 |

## HPLC spectra of 3ad

Conditions: Chiralpak IA *n*-hexane/*i*-propanol = 90/10, flow rate = 1.0 mL/min, I = 280 nm, temp. = 25 °C.

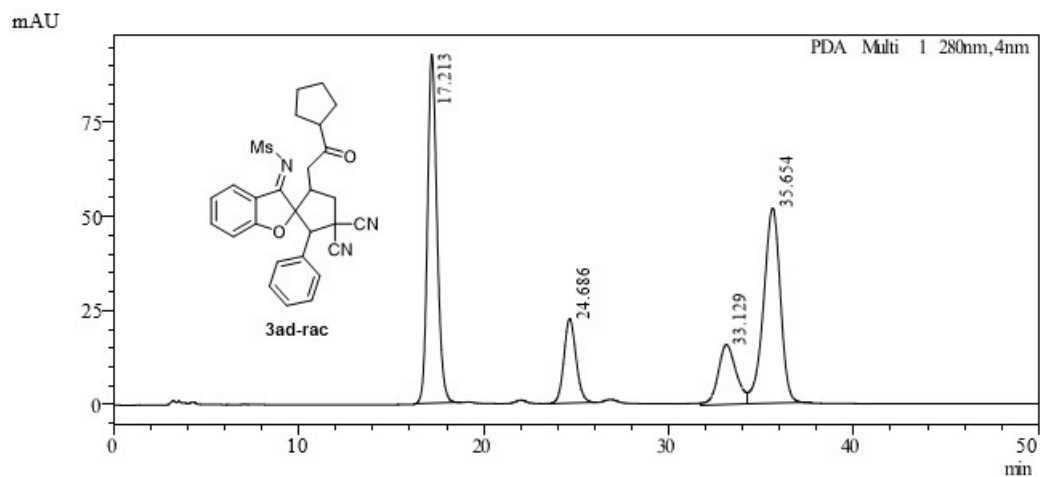

<PeakTable>

PDA Ch1 280nm

| Peak# | Ret. Time | Area    | Height | Area%   |
|-------|-----------|---------|--------|---------|
| 1     | 17.213    | 3286237 | 92717  | 37.981  |
| 2     | 24.686    | 1034717 | 22393  | 11.959  |
| 3     | 33.129    | 1032372 | 15620  | 11.932  |
| 4     | 35.654    | 3298987 | 51903  | 38.128  |
| Total |           | 8652312 | 182633 | 100.000 |

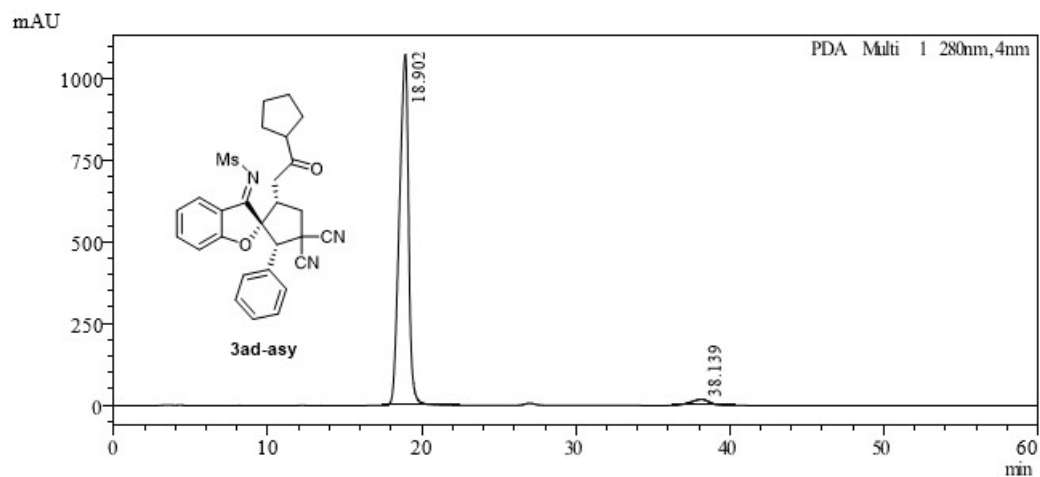

<PeakTable>

PDA Ch1 280nm

| Peak# | Ret. Time | Area     | Height  | Area%   |
|-------|-----------|----------|---------|---------|
| 1     | 18.902    | 44472031 | 1072801 | 96.604  |
| 2     | 38.139    | 1563215  | 18395   | 3.396   |
| Total |           | 46035247 | 1091196 | 100.000 |

## HPLC spectra of 3ae

Conditions: Chiralpak IE *n*-hexane/*i*-propanol = 90/10, flow rate = 1.0 mL/min, I = 210 nm, temp. = 25 °C.

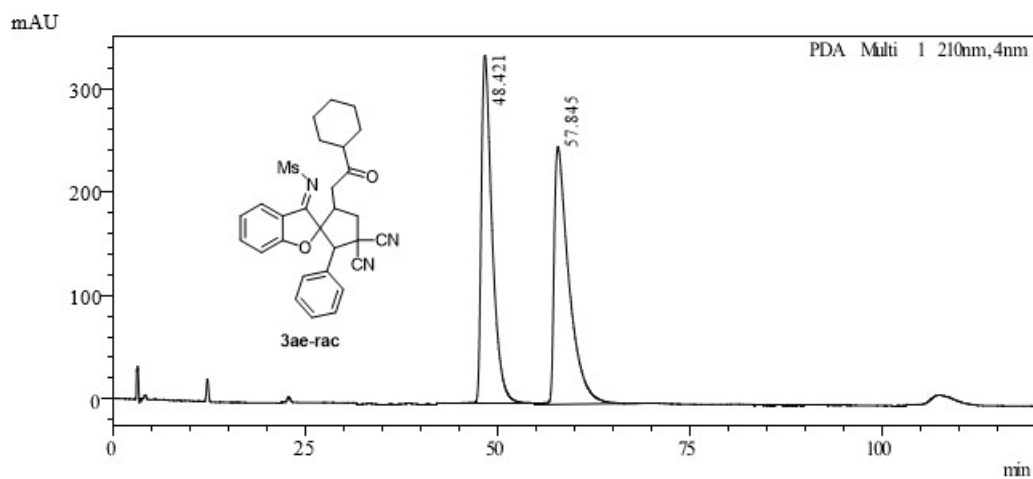

<PeakTable>

| PDA Ch1 210nm |           |          |        |         |
|---------------|-----------|----------|--------|---------|
| Peak#         | Ret. Time | Area     | Height | Area%   |
| 1             | 48.421    | 33034728 | 336598 | 50.002  |
| 2             | 57.845    | 33032494 | 247855 | 49.998  |
| Total         |           | 66067222 | 584453 | 100.000 |

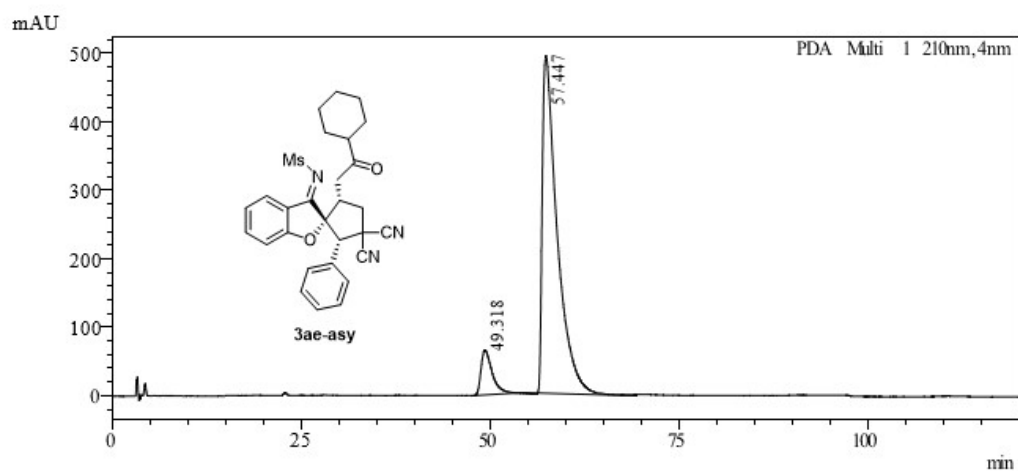

<PeakTable>

| PDA Ch1 210nm |           |          |        |         |
|---------------|-----------|----------|--------|---------|
| Peak#         | Ret. Time | Area     | Height | Area%   |
| 1             | 49.318    | 6897665  | 64451  | 9.511   |
| 2             | 57.447    | 65628483 | 492735 | 90.489  |
| Total         |           | 72526148 | 557186 | 100.000 |

## HPLC spectra of 3af

Conditions: Chiralpak IA *n*-hexane/*i*-propanol = 90/10, flow rate = 1.0 mL/min, I = 280 nm, temp. = 25 °C.

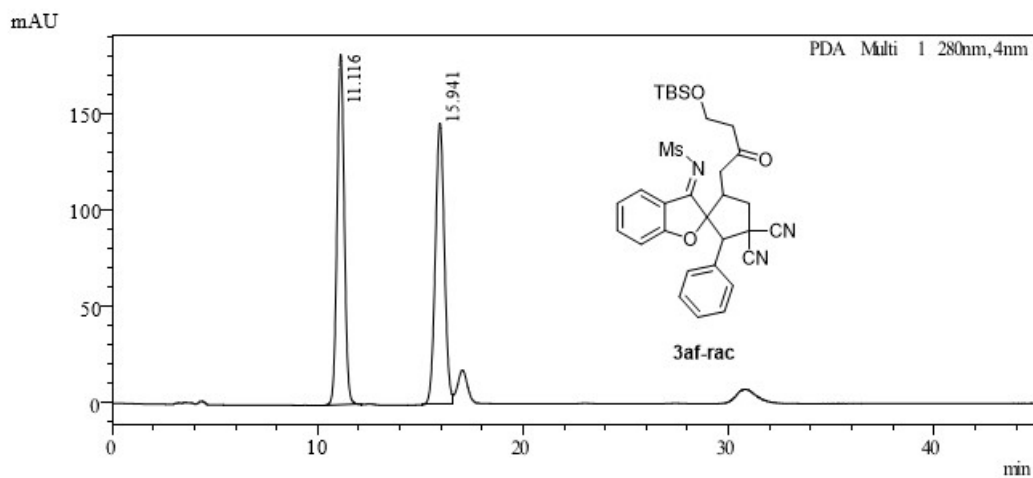

<PeakTable>

PDA Ch1 280nm

| Peak# | Ret. Time | Area    | Height | Area%   |
|-------|-----------|---------|--------|---------|
| 1     | 11.116    | 4441619 | 181686 | 49.597  |
| 2     | 15.941    | 4513784 | 146274 | 50.403  |
| Total |           | 8955403 | 327960 | 100.000 |

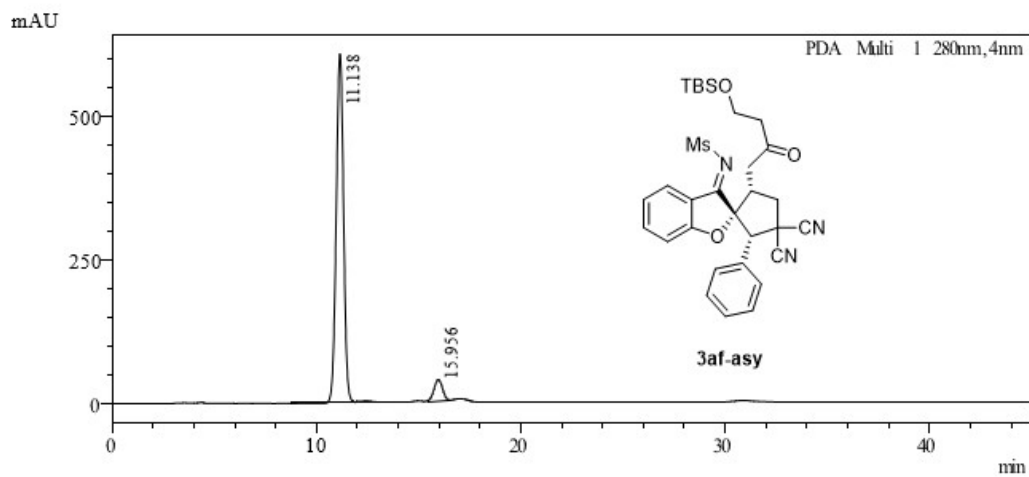

<PeakTable>

PDA Ch1 280nm

| Peak# | Ret. Time | Area     | Height | Area%   |
|-------|-----------|----------|--------|---------|
| 1     | 11.138    | 15250091 | 606867 | 93.364  |
| 2     | 15.956    | 1083950  | 37846  | 6.636   |
| Total |           | 16334041 | 644713 | 100.000 |

## HPLC spectra of **3ag**

Conditions: Chiralpak IC, *n*-hexane/*i*-propanol = 80/20, flow rate = 1.0 mL/min, I = 280 nm, temp. = 25 °C.

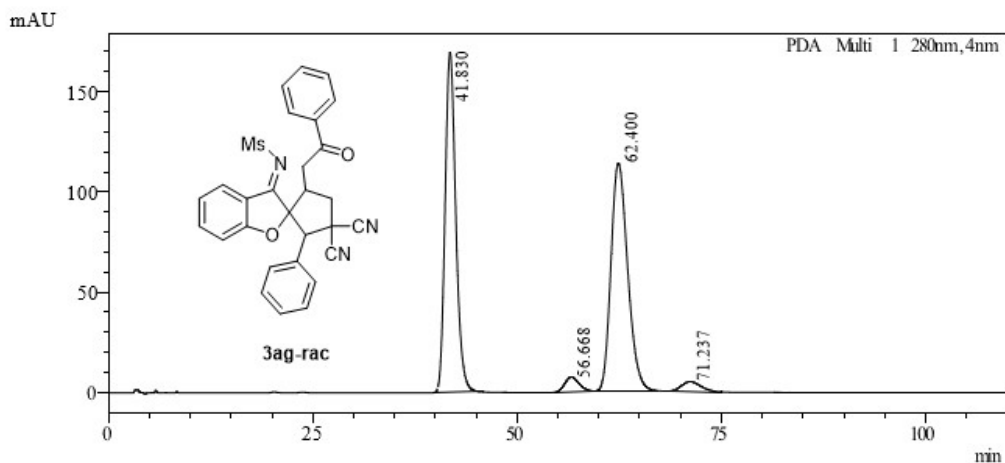

<PeakTable>

PDA Ch1 280nm

| Peak# | Ret.Time | Area     | Height | Area%   |
|-------|----------|----------|--------|---------|
| 1     | 41.830   | 16032943 | 169168 | 47.629  |
| 2     | 56.668   | 869880   | 7113   | 2.584   |
| 3     | 62.400   | 15916765 | 114001 | 47.284  |
| 4     | 71.237   | 842224   | 5210   | 2.502   |
| Total |          | 33661812 | 295492 | 100.000 |

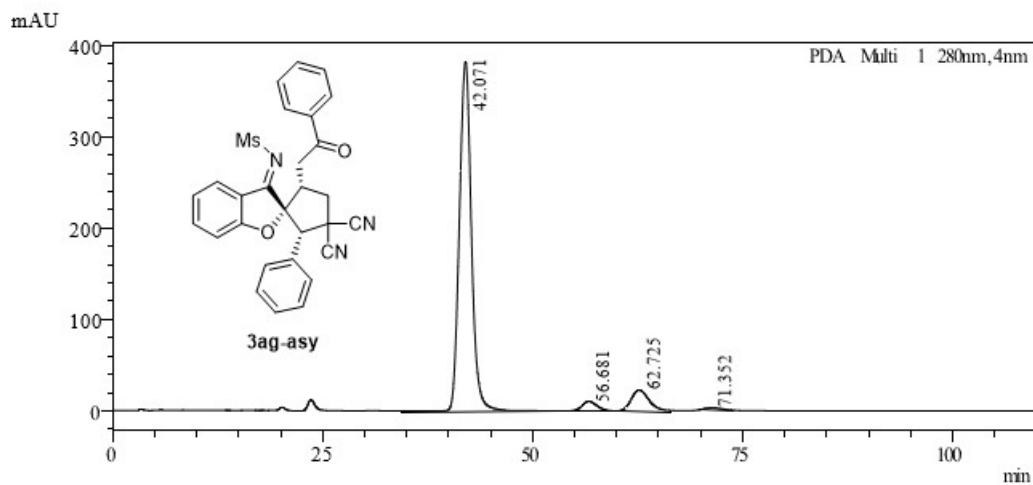

<PeakTable>

PDA Ch1 280nm

| Peak# | Ret.Time | Area     | Height | Area%   |
|-------|----------|----------|--------|---------|
| 1     | 42.071   | 37438006 | 381716 | 89.120  |
| 2     | 56.681   | 1157488  | 9589   | 2.755   |
| 3     | 62.725   | 3054739  | 21913  | 7.272   |
| 4     | 71.352   | 358470   | 2671   | 0.853   |
| Total |          | 42008703 | 415888 | 100.000 |

## HPLC spectra of 3ah

Conditions: Chiralpak IB *n*-hexane/*i*-propanol = 90/10, flow rate = 1.0 mL/min, I = 254 nm, temp. = 25 °C.

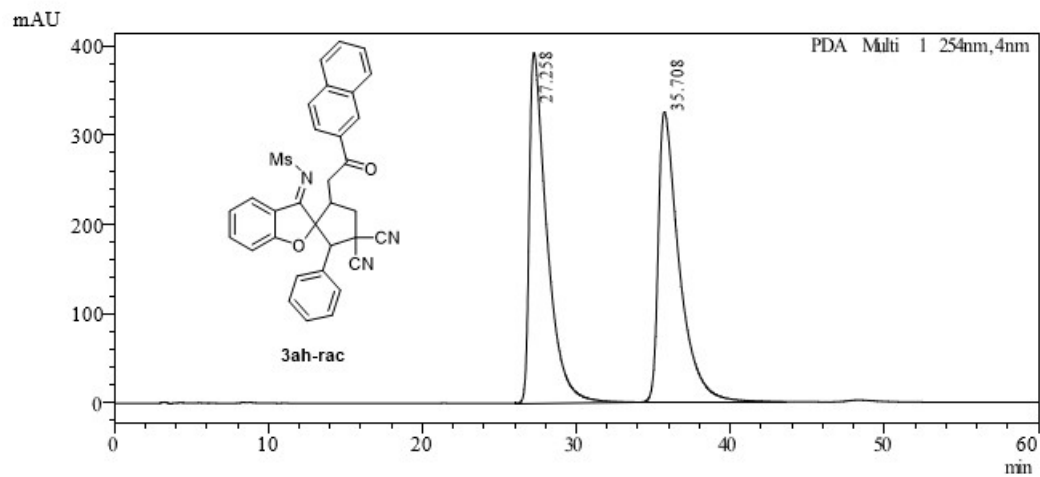

<PeakTable>

PDA Ch1 254nm

| Peak# | Ret. Time | Area     | Height | Area%   |
|-------|-----------|----------|--------|---------|
| 1     | 27.258    | 30678452 | 391509 | 49.653  |
| 2     | 35.708    | 31106674 | 324864 | 50.347  |
| Total |           | 61785125 | 716374 | 100.000 |

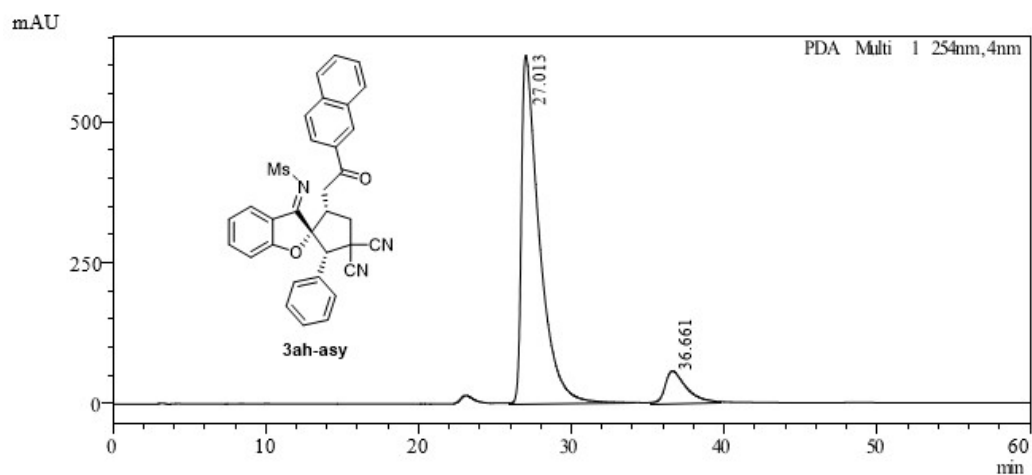

<PeakTable>

PDA Ch1 254nm

| Peak# | Ret. Time | Area     | Height | Area%   |
|-------|-----------|----------|--------|---------|
| 1     | 27.013    | 49736425 | 616455 | 90.840  |
| 2     | 36.661    | 5015274  | 54846  | 9.160   |
| Total |           | 54751699 | 671301 | 100.000 |

## HPLC spectra of 5

Conditions: Chiralpak IA *n*-hexane/*i*-propanol = 90/10, flow rate = 1.0 mL/min, I = 280 nm, temp. = 25 °C.

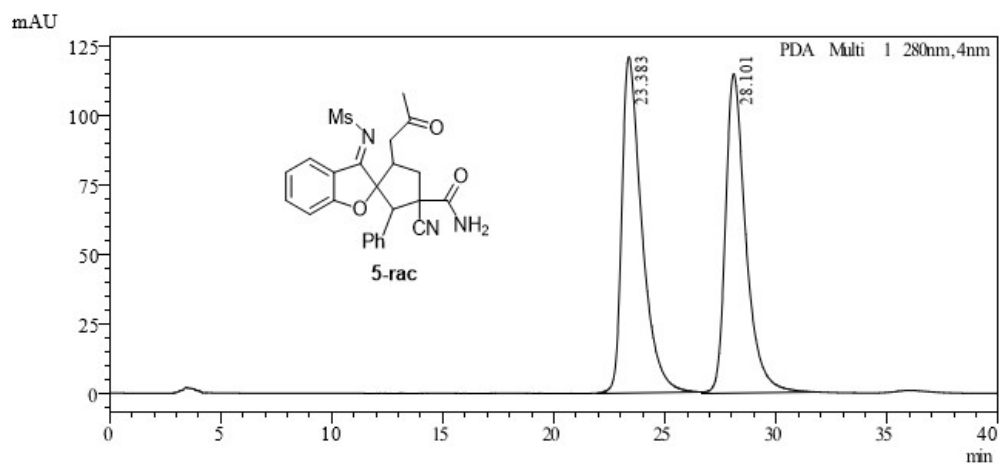

<PeakTable>

PDA Ch1 280nm

| Peak# | Ret.Time | Area     | Height | Area%   |
|-------|----------|----------|--------|---------|
| 1     | 23.383   | 7471152  | 121032 | 50.383  |
| 2     | 28.101   | 7357488  | 114571 | 49.617  |
| Total |          | 14828640 | 235603 | 100.000 |

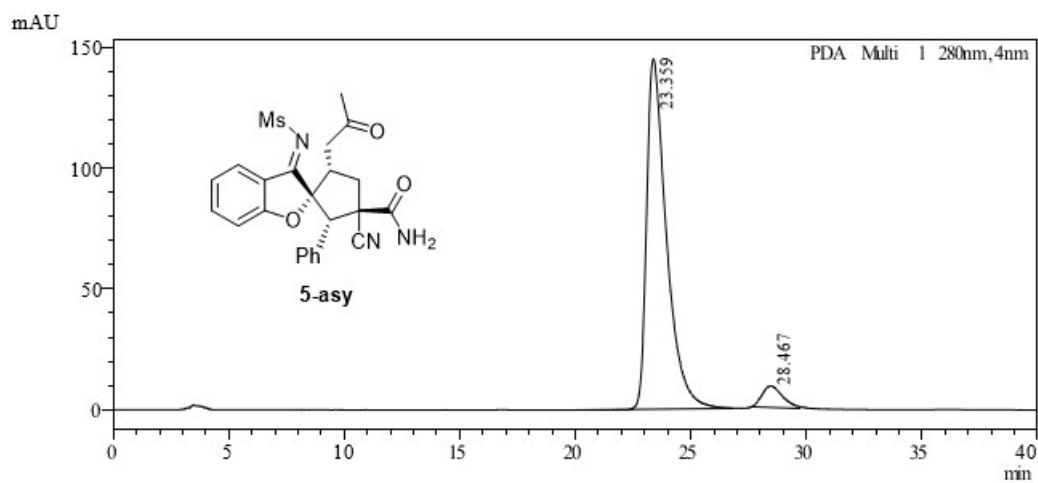

<PeakTable>

PDA Ch1 280nm

| Peak# | Ret.Time | Area    | Height | Area%   |
|-------|----------|---------|--------|---------|
| 1     | 23.359   | 8701913 | 144503 | 94.662  |
| 2     | 28.467   | 490694  | 8446   | 5.338   |
| Total |          | 9192608 | 152949 | 100.000 |



## HPLC spectra of 6

Conditions: Chiralpak IA *n*-hexane/*i*-propanol = 90/10, flow rate = 1.0 mL/min, I = 254 nm, temp. = 25 °C.

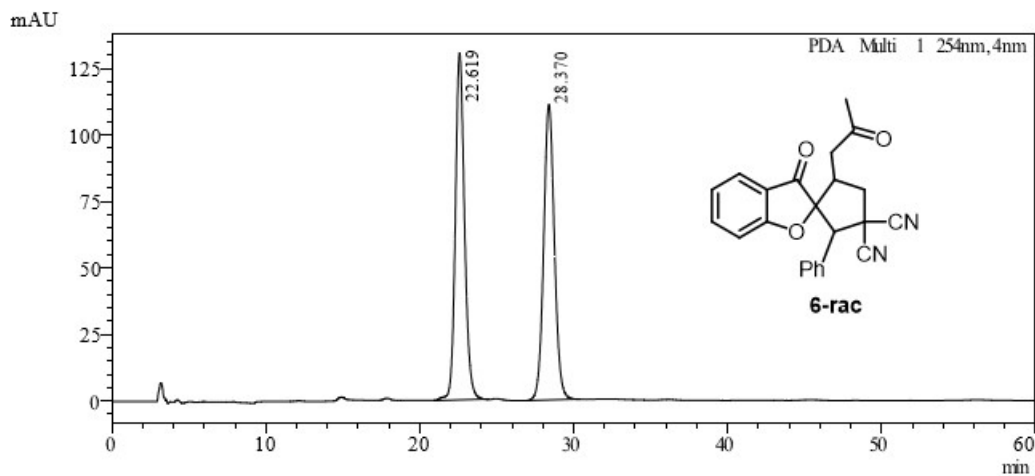

<PeakTable>

PDA Ch1 254nm

| Peak# | Ret. Time | Area     | Height | Area%   |
|-------|-----------|----------|--------|---------|
| 1     | 22.619    | 5391866  | 130312 | 50.160  |
| 2     | 28.370    | 5357382  | 111111 | 49.840  |
| Total |           | 10749248 | 241424 | 100.000 |

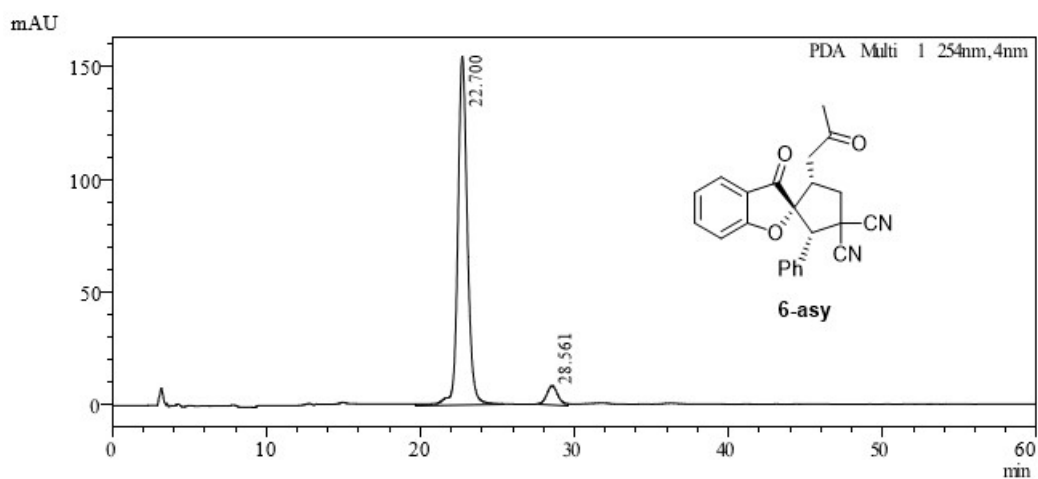

<PeakTable>

PDA Ch1 254nm

| Peak# | Ret. Time | Area    | Height | Area%   |
|-------|-----------|---------|--------|---------|
| 1     | 22.700    | 6475751 | 153998 | 94.522  |
| 2     | 28.561    | 375308  | 8128   | 5.478   |
| Total |           | 6851059 | 162126 | 100.000 |

## 12. X-ray crystallographic data of **3q**

The single crystal of **3q**, which was used for the determination of its configuration via X-ray crystallography (see below), was recrystallized from a mixed solution of **3q** in CH<sub>2</sub>Cl<sub>2</sub> and hexane.

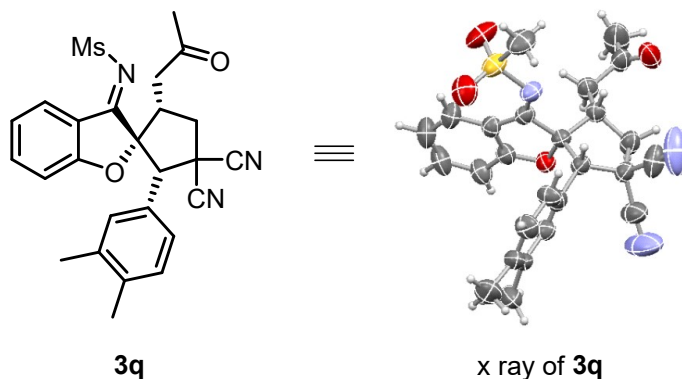

ORTEP drawing (50% probability ellipsoids) of **3q** (CCDC 2322514)

Crystal data and structure refinement for **3q**

|                                    |                                                                    |
|------------------------------------|--------------------------------------------------------------------|
| Identification code                | <b>3q</b>                                                          |
| CCDC Deposit number                | 2322514                                                            |
| Empirical formula                  | 3(C <sub>26</sub> H <sub>25</sub> N <sub>3</sub> O <sub>4</sub> S) |
| Formula weight                     | 475.55                                                             |
| Temperature (K)                    | 298.34                                                             |
| Wavelength (Å)                     | 1.5418                                                             |
| Crystal system                     | orthorhombic                                                       |
| space group                        | P2 <sub>1</sub> 2 <sub>1</sub> 2 <sub>1</sub>                      |
| a/Å                                | 10.46620(10)                                                       |
| b/Å                                | 13.1332(2)                                                         |
| c/Å                                | 18.2388(2)                                                         |
| α/°                                | 90                                                                 |
| β/°                                | 90                                                                 |
| γ/°                                | 90                                                                 |
| Volume/ Å <sup>3</sup>             | 2507.01(5)                                                         |
| Z                                  | 4                                                                  |
| ρ <sub>calc</sub> /cm <sup>3</sup> | 1.260                                                              |
| μ /mm <sup>-1</sup>                | 1.445                                                              |
| F (000)                            | 1000                                                               |

|                                             |                                                               |
|---------------------------------------------|---------------------------------------------------------------|
| Crystal size/mm <sup>3</sup>                | 0.2 × 0.18 × 0.16                                             |
| Radiation                                   | CuKα(λ = 1.54184)                                             |
| 2θ range for data collection/°              | 8.296 to 153.618                                              |
| Index ranges                                | -13 ≤ h ≤ 12, -16 ≤ k ≤ 9, -20 ≤ l ≤ 22                       |
| Reflections collected                       | 14876                                                         |
| Goodness-of-fit on F <sup>2</sup>           | 1.066                                                         |
| Independent reflections                     | 5022 [R <sub>int</sub> = 0.0239, R <sub>sigma</sub> = 0.0237] |
| Data/restraints/parameters                  | 5022/54/378                                                   |
| Final R indexes [I ≥ 2σ (I)]                | R <sub>1</sub> = 0.0431, wR <sub>2</sub> = 0.1252             |
| Final R indexes [all data]                  | R <sub>1</sub> = 0.0453, wR <sub>2</sub> = 0.1276             |
| Largest diff. peak/hole / e Å <sup>-3</sup> | 0.39/-0.25                                                    |
| Flack parameter                             | -0.006(7)                                                     |
